# Supplementary material for: Population Genetics Analysis of SLC3A1 and SLC7A9 Revealed the Etiology of Cystine Stone May Be More Than What Our Current Genetic Knowledge Can Explain
Source: bioRxiv or medRxiv preprint supplement (doi:10.1101/2023.05.09.23289733), 2023-05-10
Supplement: Supplementary file [file media-1.pdf]

Supplementary Table 1. Variants of SLC3A1 in the 1KG database

| Chr  | Start Position | End Position | Variant type | Ref Genotype   Ref Proteotype | Variant Genotype 1   Variant Proteotype 1 | Count | Variant Genotype 2   Variant Proteotype 2 | Count |  |  |  |  |  |  |
|------|----------------|--------------|--------------|-------------------------------|-------------------------------------------|-------|-------------------------------------------|-------|--|--|--|--|--|--|
| chr2 | 44502708       | 44502708     | SNV          | G E                           | A:G K:E                                   | 2     |                                           | 0     |  |  |  |  |  |  |
| chr2 | 44502788       | 44502788     | SNV          | A G                           | C:C G:G                                   | 1325  | A:C G:G                                   | 873   |  |  |  |  |  |  |
| chr2 | 44502872       | 44502872     | SNV          | G A                           | A:G A:A                                   | 2     |                                           | 0     |  |  |  |  |  |  |
| chr2 | 44503179       | 44503179     | SNV          | A                             | A:G                                       | 2     |                                           | 0     |  |  |  |  |  |  |
| chr2 | 44503430       | 44503430     | SNV          | C                             | A:C                                       | 17    |                                           | 0     |  |  |  |  |  |  |
| chr2 | 44503642       | 44503642     | SNV          | A                             | A:G                                       | 422   | G:G                                       | 35    |  |  |  |  |  |  |
| chr2 | 44503751       | 44503762     | deletion     | GCTACTTGGGAG                  | --                                        | 111   | --GCTACTTGGGAG                            | 668   |  |  |  |  |  |  |
| chr2 | 44503775       | 44503775     | SNV          | G                             | C:G                                       | 6     |                                           | 0     |  |  |  |  |  |  |
| chr2 | 44503832       | 44503832     | SNV          | C                             | C:T                                       | 37    | T:T                                       | 1     |  |  |  |  |  |  |
| chr2 | 44504129       | 44504129     | SNV          | G                             | T:T                                       | 4     | G:T                                       | 128   |  |  |  |  |  |  |
| chr2 | 44504134       | 44504134     | SNV          | G                             | C:G                                       | 81    | C:C                                       | 3     |  |  |  |  |  |  |
| chr2 | 44504169       | 44504169     | SNV          | C                             | A:C                                       | 21    |                                           | 0     |  |  |  |  |  |  |
| chr2 | 44504176       | 44504176     | SNV          | C                             | A:C                                       | 73    | A:A                                       | 3     |  |  |  |  |  |  |
| chr2 | 44504240       | 44504240     | insertion    | -                             | -:C                                       | 1106  | C:C                                       | 877   |  |  |  |  |  |  |
| chr2 | 44504280       | 44504280     | deletion     | C                             | -:C                                       | 3     |                                           | 0     |  |  |  |  |  |  |
| chr2 | 44504372       | 44504372     | SNV          | G                             | A:G                                       | 9     |                                           | 0     |  |  |  |  |  |  |
| chr2 | 44504438       | 44504438     | SNV          | G                             | A:G                                       | 1     |                                           | 0     |  |  |  |  |  |  |
| chr2 | 44504465       | 44504465     | SNV          | C                             | T:T                                       | 4     | C:T                                       | 129   |  |  |  |  |  |  |
| chr2 | 44504495       | 44504495     | SNV          | C                             | A:C                                       | 165   | A:A                                       | 12    |  |  |  |  |  |  |
| chr2 | 44504536       | 44504536     | SNV          | C                             | C:T                                       | 1     |                                           | 0     |  |  |  |  |  |  |
| chr2 | 44504558       | 44504558     | SNV          | G                             | A:A                                       | 4     | A:G                                       | 130   |  |  |  |  |  |  |
| chr2 | 44504587       | 44504587     | SNV          | A                             | A:G                                       | 19    |                                           | 0     |  |  |  |  |  |  |
| chr2 | 44504748       | 44504748     | insertion    | -                             | -:C                                       | 7     |                                           | 0     |  |  |  |  |  |  |
| chr2 | 44504857       | 44504857     | SNV          | C                             | C:T                                       | 307   | T:T                                       | 13    |  |  |  |  |  |  |
| chr2 | 44504877       | 44504877     | SNV          | T                             | C:T                                       | 960   | C:C                                       | 1197  |  |  |  |  |  |  |
| chr2 | 44505149       | 44505149     | SNV          | C                             | A:C                                       | 17    |                                           | 0     |  |  |  |  |  |  |
| chr2 | 44505185       | 44505185     | SNV          | T                             | G:T                                       | 805   | G:G                                       | 1410  |  |  |  |  |  |  |
| chr2 | 44505321       | 44505321     | SNV          | C                             | T:T                                       | 2     | C:T                                       | 82    |  |  |  |  |  |  |
| chr2 | 44505329       | 44505329     | SNV          | A                             | A:G                                       | 26    |                                           | 0     |  |  |  |  |  |  |
| chr2 | 44505429       | 44505429     | insertion    | -                             | -:A                                       | 11    |                                           | 0     |  |  |  |  |  |  |
| chr2 | 44505457       | 44505457     | SNV          | G                             | C:G                                       | 18    |                                           | 0     |  |  |  |  |  |  |
| chr2 | 44505574       | 44505574     | SNV          | G                             | A:G                                       | 9     |                                           | 0     |  |  |  |  |  |  |
| chr2 | 44505588       | 44505588     | insertion    | -                             | --AAAT                                    | 22    |                                           | 0     |  |  |  |  |  |  |
| chr2 | 44505608       | 44505608     | insertion    | -                             | --AAATA                                   | 17    |                                           | 0     |  |  |  |  |  |  |
| chr2 | 44505879       | 44505879     | SNV          | G                             | A:A                                       | 1     | A:G                                       | 79    |  |  |  |  |  |  |
| chr2 | 44505890       | 44505890     | SNV          | A                             | A:G                                       | 15    |                                           | 0     |  |  |  |  |  |  |
| chr2 | 44506089       | 44506089     | SNV          | T                             | C:T                                       | 31    | C:C                                       | 2     |  |  |  |  |  |  |
| chr2 | 44506145       | 44506145     | SNV          | T                             | A:T                                       | 589   | A:A                                       | 49    |  |  |  |  |  |  |
| chr2 | 44506256       | 44506256     | SNV          | G                             | A:G                                       | 219   | A:A                                       | 20    |  |  |  |  |  |  |
| chr2 | 44506345       | 44506345     | SNV          | G                             | A:G                                       | 1193  | A:A                                       | 643   |  |  |  |  |  |  |
| chr2 | 44506368       | 44506368     | SNV          | A                             | A:T                                       | 163   | T:T                                       | 11    |  |  |  |  |  |  |
| chr2 | 44506740       | 44506740     | SNV          | T                             | C:T                                       | 238   | C:C                                       | 21    |  |  |  |  |  |  |
| chr2 | 44506856       | 44506856     | SNV          | T                             | C:T                                       | 1     |                                           | 0     |  |  |  |  |  |  |
| chr2 | 44506921       | 44506921     | SNV          | C                             | C:T                                       | 1201  | T:T                                       | 652   |  |  |  |  |  |  |
| chr2 | 44506971       | 44506971     | SNV          | G                             | C:C                                       | 641   | C:G                                       | 1200  |  |  |  |  |  |  |
| chr2 | 44507074       | 44507074     | SNV          | G                             | A:G                                       | 19    |                                           | 0     |  |  |  |  |  |  |
| chr2 | 44507213       | 44507213     | SNV          | C                             | T:T                                       | 572   | C:T                                       | 1148  |  |  |  |  |  |  |
| chr2 | 44507239       | 44507239     | SNV          | G                             | C:G                                       | 45    |                                           | 0     |  |  |  |  |  |  |
| chr2 | 44507598       | 44507598     | SNV          | G                             | A:G                                       | 32    | A:A                                       | 1     |  |  |  |  |  |  |
| chr2 | 44507657       | 44507657     | SNV          | G                             | A:G                                       | 1     |                                           | 0     |  |  |  |  |  |  |
| chr2 | 44507672       | 44507672     | SNV          | C                             | C:T                                       | 2     |                                           | 0     |  |  |  |  |  |  |
| chr2 | 44507673       | 44507673     | SNV          | G                             | A:G                                       | 1153  | A:A                                       | 568   |  |  |  |  |  |  |
| chr2 | 44507820       | 44507820     | SNV          | T                             | C:T                                       | 4     |                                           | 0     |  |  |  |  |  |  |
| chr2 | 44507990       | 44507990     | SNV          | C T                           | C:T T:M                                   | 6     |                                           | 0     |  |  |  |  |  |  |
| chr2 | 44508095       | 44508095     | SNV          | T                             | C:C                                       | 4     | C:T                                       | 80    |  |  |  |  |  |  |
| chr2 | 44508142       | 44508142     | insertion    | -                             | --TCCC                                    | 372   | TCCC:TCCC                                 | 91    |  |  |  |  |  |  |
| chr2 | 44508180       | 44508180     | SNV          | G                             | A:G                                       | 3     |                                           | 0     |  |  |  |  |  |  |
| chr2 | 44508181       | 44508181     | SNV          | C                             | C:T                                       | 70    | T:T                                       | 3     |  |  |  |  |  |  |
| chr2 | 44508193       | 44508193     | SNV          | T                             | G:T                                       | 207   | G:G                                       | 18    |  |  |  |  |  |  |
| chr2 | 44508203       | 44508203     | SNV          | C                             | G:G                                       | 2     | C:G                                       | 70    |  |  |  |  |  |  |
| chr2 | 44508251       | 44508251     | SNV          | C                             | C:G                                       | 11    |                                           | 0     |  |  |  |  |  |  |
| chr2 | 44508298       | 44508298     | insertion    | -                             | T:T                                       | 365   | -:T                                       | 1602  |  |  |  |  |  |  |
| chr2 | 44508695       | 44508695     | SNV          | G                             | A:G                                       | 12    |                                           | 0     |  |  |  |  |  |  |
| chr2 | 44508835       | 44508835     | SNV          | G                             | A:G                                       | 1180  | A:A                                       | 806   |  |  |  |  |  |  |
| chr2 | 44508932       | 44508935     | deletion     | CCTT                          | --CCTT                                    | 12    |                                           | 0     |  |  |  |  |  |  |
| chr2 | 44508951       | 44508951     | SNV          | C                             | C:T                                       | 8     |                                           | 0     |  |  |  |  |  |  |
| chr2 | 44509044       | 44509044     | SNV          | G                             | G:T                                       | 3     |                                           | 0     |  |  |  |  |  |  |
| chr2 | 44509155       | 44509155     | SNV          | C                             | C:T                                       | 67    | T:T                                       | 0     |  |  |  |  |  |  |
| chr2 | 44509160       | 44509160     | SNV          | G                             | A:G                                       | 54    |                                           | 0     |  |  |  |  |  |  |
| chr2 | 44509276       | 44509276     | SNV          | G                             | A:G                                       | 7     |                                           | 0     |  |  |  |  |  |  |
| chr2 | 44509362       | 44509362     | SNV          | T                             | C:T                                       | 31    |                                           | 0     |  |  |  |  |  |  |
| chr2 | 44509564       | 44509564     | SNV          | C                             | A:C                                       | 144   | A:A                                       | 6     |  |  |  |  |  |  |
| chr2 | 44509653       | 44509653     | SNV          | C                             | C:G                                       | 1     |                                           | 0     |  |  |  |  |  |  |
| chr2 | 44509760       | 44509760     | SNV          | A                             | A:C                                       | 1     |                                           | 0     |  |  |  |  |  |  |
| chr2 | 44509762       | 44509762     | SNV          | C                             | C:T                                       | 8     |                                           | 0     |  |  |  |  |  |  |
| chr2 | 44509924       | 44509924     | SNV          | G                             | C:G                                       | 1     |                                           | 0     |  |  |  |  |  |  |
| chr2 | 44510104       | 44510104     | SNV          | T                             | C:T                                       | 1     |                                           | 0     |  |  |  |  |  |  |
| chr2 | 44510146       | 44510146     | SNV          | A                             | T:T                                       | 891   | A:T                                       | 1154  |  |  |  |  |  |  |
| chr2 | 44510179       | 44510179     | SNV          | T                             | C:T                                       | 922   | C:C                                       | 1242  |  |  |  |  |  |  |
| chr2 | 44510196       | 44510196     | SNV          | G                             | T:T                                       | 35    | G:T                                       | 269   |  |  |  |  |  |  |
| chr2 | 44510214       | 44510214     | SNV          | C                             | C:T                                       | 5     |                                           | 0     |  |  |  |  |  |  |
| chr2 | 44510270       | 44510270     | SNV          | C                             | C:T                                       | 2     |                                           | 0     |  |  |  |  |  |  |
| chr2 | 44510557       | 44510557     | SNV          | C                             | C:G                                       | 2     |                                           | 0     |  |  |  |  |  |  |
| chr2 | 44510578       | 44510578     | SNV          | C                             | T:T                                       | 3     | C:T                                       | 70    |  |  |  |  |  |  |
| chr2 | 44510758       | 44510758     | deletion     | T                             | -:T                                       | 11    |                                           | 0     |  |  |  |  |  |  |
| chr2 | 44510861       | 44510861     | SNV          | C                             | A:C                                       | 24    |                                           | 0     |  |  |  |  |  |  |
| chr2 | 44510936       | 44510936     | SNV          | C                             | C:T                                       | 159   | T:T                                       | 9     |  |  |  |  |  |  |
| chr2 | 44511152       | 44511152     | deletion     | T                             | -:T                                       | 22    |                                           | 0     |  |  |  |  |  |  |
| chr2 | 44511155       | 44511155     | SNV          | T                             | A:T                                       | 4     |                                           | 0     |  |  |  |  |  |  |
| chr2 | 44511198       | 44511198     | SNV          | A                             | A:G                                       | 6     |                                           | 0     |  |  |  |  |  |  |
| chr2 | 44511391       | 44511391     | SNV          | G                             | C:G                                       | 5     |                                           | 0     |  |  |  |  |  |  |
| chr2 | 44511667       | 44511667     | SNV          | A                             | T:T                                       | 3     | A:T                                       | 70    |  |  |  |  |  |  |
| chr2 | 44511787       | 44511787     | SNV          | G                             | G:T                                       | 33    |                                           | 0     |  |  |  |  |  |  |
| chr2 | 44511806       | 44511806     | SNV          | A                             | G:G                                       | 12    | A:G                                       | 149   |  |  |  |  |  |  |
| chr2 | 44511861       | 44511861     | SNV          | T                             | C:C                                       | 1118  | C:T                                       | 1005  |  |  |  |  |  |  |

Supplementary Table 1. Variants of SLC3A1 in the 1KG database

| Chr  | Start Position | End Position | Variant type | Ref Genotype   Ref Proteotype | Variant Genotype 1   Variant Proteotype 1 | Count | Variant Genotype 2   Variant Proteotype 2 | Count |  |  |  |  |  |  |  |
|------|----------------|--------------|--------------|-------------------------------|-------------------------------------------|-------|-------------------------------------------|-------|--|--|--|--|--|--|--|
| chr2 | 44511929       | 44511929     | SNV          | T                             | C:T                                       | 1177  | C:C                                       | 797   |  |  |  |  |  |  |  |
| chr2 | 44512162       | 44512162     | SNV          | C                             | C:T                                       | 4     |                                           | 0     |  |  |  |  |  |  |  |
| chr2 | 44512524       | 44512526     | deletion     | ATT                           | --ATT                                     | 19    |                                           | 0     |  |  |  |  |  |  |  |
| chr2 | 44512579       | 44512579     | SNV          | C                             | C:T                                       | 33    |                                           | 0     |  |  |  |  |  |  |  |
| chr2 | 44512797       | 44512797     | SNV          | T                             | C:T                                       | 26    |                                           | 0     |  |  |  |  |  |  |  |
| chr2 | 44512952       | 44512952     | SNV          | G                             | A:G                                       | 72    | A:A                                       | 3     |  |  |  |  |  |  |  |
| chr2 | 44512970       | 44512970     | SNV          | C                             | C:T                                       | 5     |                                           | 0     |  |  |  |  |  |  |  |
| chr2 | 44513087       | 44513087     | SNV          | G                             | A:G                                       | 36    |                                           | 0     |  |  |  |  |  |  |  |
| chr2 | 44513135       | 44513135     | SNV          | A                             | A:G                                       | 48    |                                           | 0     |  |  |  |  |  |  |  |
| chr2 | 44513202       | 44513202     | SNV          | T F                           | C:T S:F                                   | 7     |                                           | 0     |  |  |  |  |  |  |  |
| chr2 | 44513704       | 44513704     | SNV          | C                             | C:T                                       | 12    |                                           | 0     |  |  |  |  |  |  |  |
| chr2 | 44513721       | 44513721     | SNV          | C                             | C:T                                       | 3     |                                           | 0     |  |  |  |  |  |  |  |
| chr2 | 44513872       | 44513872     | SNV          | A                             | G:G                                       | 9     | A:G                                       | 177   |  |  |  |  |  |  |  |
| chr2 | 44513890       | 44513890     | SNV          | G                             | A:G                                       | 146   |                                           | 0     |  |  |  |  |  |  |  |
| chr2 | 44514271       | 44514271     | SNV          | C                             | C:G                                       | 47    |                                           | 0     |  |  |  |  |  |  |  |
| chr2 | 44514438       | 44514438     | SNV          | T                             | C:C                                       | 11    | C:T                                       | 144   |  |  |  |  |  |  |  |
| chr2 | 44514481       | 44514481     | SNV          | C                             | C:T                                       | 1     |                                           | 0     |  |  |  |  |  |  |  |
| chr2 | 44514547       | 44514547     | SNV          | G                             | A:G                                       | 1     |                                           | 0     |  |  |  |  |  |  |  |
| chr2 | 44514844       | 44514844     | SNV          | C                             | C:G                                       | 10    |                                           | 0     |  |  |  |  |  |  |  |
| chr2 | 44514862       | 44514862     | SNV          | A                             | A:G                                       | 1     |                                           | 0     |  |  |  |  |  |  |  |
| chr2 | 44514897       | 44514897     | SNV          | G                             | A:G                                       | 146   | A:A                                       | 6     |  |  |  |  |  |  |  |
| chr2 | 44515068       | 44515068     | SNV          | A                             | A:G                                       | 97    | G:G                                       | 3     |  |  |  |  |  |  |  |
| chr2 | 44515084       | 44515084     | SNV          | C                             | T:T                                       | 20    | C:T                                       | 228   |  |  |  |  |  |  |  |
| chr2 | 44515085       | 44515085     | SNV          | A                             | G:G                                       | 1     | A:G                                       | 49    |  |  |  |  |  |  |  |
| chr2 | 44515257       | 44515257     | SNV          | C                             | T:T                                       | 385   | C:T                                       | 847   |  |  |  |  |  |  |  |
| chr2 | 44515538       | 44515538     | SNV          | C                             | C:T                                       | 32    |                                           | 0     |  |  |  |  |  |  |  |
| chr2 | 44515579       | 44515579     | SNV          | C                             | C:T                                       | 118   | T:T                                       | 11    |  |  |  |  |  |  |  |
| chr2 | 44515611       | 44515611     | SNV          | T                             | C:T                                       | 4     |                                           | 0     |  |  |  |  |  |  |  |
| chr2 | 44515656       | 44515656     | SNV          | T                             | A:T                                       | 33    |                                           | 0     |  |  |  |  |  |  |  |
| chr2 | 44515668       | 44515668     | SNV          | C                             | T:T                                       | 20    | C:T                                       | 228   |  |  |  |  |  |  |  |
| chr2 | 44515764       | 44515764     | SNV          | C                             | C:T                                       | 3     |                                           | 0     |  |  |  |  |  |  |  |
| chr2 | 44515851       | 44515851     | SNV          | C                             | T:T                                       | 3     | C:T                                       | 115   |  |  |  |  |  |  |  |
| chr2 | 44515859       | 44515859     | SNV          | G                             | A:G                                       | 15    |                                           | 0     |  |  |  |  |  |  |  |
| chr2 | 44516087       | 44516087     | SNV          | C                             | A:A                                       | 24    | A:C                                       | 220   |  |  |  |  |  |  |  |
| chr2 | 44516088       | 44516088     | SNV          | C                             | A:C                                       | 220   | A:A                                       | 24    |  |  |  |  |  |  |  |
| chr2 | 44516120       | 44516120     | SNV          | C                             | C:T                                       | 10    |                                           | 0     |  |  |  |  |  |  |  |
| chr2 | 44516161       | 44516162     | deletion     | AT                            | --                                        | 1     | --AT                                      | 45    |  |  |  |  |  |  |  |
| chr2 | 44516282       | 44516282     | SNV          | A                             | G:G                                       | 1276  | A:G                                       | 875   |  |  |  |  |  |  |  |
| chr2 | 44516351       | 44516351     | SNV          | T                             | G:T                                       | 1     |                                           | 0     |  |  |  |  |  |  |  |
| chr2 | 44516399       | 44516399     | SNV          | G                             | C:G                                       | 1     |                                           | 0     |  |  |  |  |  |  |  |
| chr2 | 44516411       | 44516411     | SNV          | G                             | A:G                                       | 3     |                                           | 0     |  |  |  |  |  |  |  |
| chr2 | 44516631       | 44516631     | SNV          | T                             | C:T                                       | 210   | C:C                                       | 17    |  |  |  |  |  |  |  |
| chr2 | 44516767       | 44516770     | deletion     | TATT                          | --                                        | 3     | --TATT                                    | 90    |  |  |  |  |  |  |  |
| chr2 | 44516892       | 44516892     | SNV          | C                             | A:A                                       | 10    | A:C                                       | 147   |  |  |  |  |  |  |  |
| chr2 | 44516916       | 44516916     | SNV          | C                             | T:T                                       | 2     | C:T                                       | 65    |  |  |  |  |  |  |  |
| chr2 | 44516961       | 44516961     | SNV          | C                             | C:T                                       | 2     |                                           | 0     |  |  |  |  |  |  |  |
| chr2 | 44517017       | 44517017     | SNV          | G                             | A:G                                       | 2     |                                           | 0     |  |  |  |  |  |  |  |
| chr2 | 44517034       | 44517034     | SNV          | T                             | A:A                                       | 1     | A:T                                       | 29    |  |  |  |  |  |  |  |
| chr2 | 44517036       | 44517036     | SNV          | C                             | G:G                                       | 1     | C:G                                       | 29    |  |  |  |  |  |  |  |
| chr2 | 44517072       | 44517072     | SNV          | A                             | C:C                                       | 759   | A:C                                       | 1183  |  |  |  |  |  |  |  |
| chr2 | 44517080       | 44517080     | insertion    | -                             | --T                                       | 288   | T:T                                       | 16    |  |  |  |  |  |  |  |
| chr2 | 44517148       | 44517148     | SNV          | A                             | A:G                                       | 238   | G:G                                       | 22    |  |  |  |  |  |  |  |
| chr2 | 44517190       | 44517190     | SNV          | T                             | A:T                                       | 215   | A:A                                       | 21    |  |  |  |  |  |  |  |
| chr2 | 44517204       | 44517204     | SNV          | T                             | G:T                                       | 1     |                                           | 0     |  |  |  |  |  |  |  |
| chr2 | 44517262       | 44517262     | insertion    | -                             | --T                                       | 1404  | T:T                                       | 316   |  |  |  |  |  |  |  |
| chr2 | 44517304       | 44517304     | SNV          | A                             | A:G                                       | 2     |                                           | 0     |  |  |  |  |  |  |  |
| chr2 | 44517476       | 44517476     | SNV          | T                             | G:G                                       | 4     | G:T                                       | 97    |  |  |  |  |  |  |  |
| chr2 | 44517559       | 44517559     | SNV          | G                             | A:G                                       | 20    |                                           | 0     |  |  |  |  |  |  |  |
| chr2 | 44517576       | 44517576     | SNV          | C                             | C:T                                       | 4     |                                           | 0     |  |  |  |  |  |  |  |
| chr2 | 44517662       | 44517662     | SNV          | T                             | C:T                                       | 1180  | C:C                                       | 757   |  |  |  |  |  |  |  |
| chr2 | 44517704       | 44517704     | SNV          | G                             | A:G                                       | 1     |                                           | 0     |  |  |  |  |  |  |  |
| chr2 | 44517722       | 44517722     | SNV          | G                             | A:G                                       | 40    | A:A                                       | 1     |  |  |  |  |  |  |  |
| chr2 | 44517752       | 44517752     | SNV          | G                             | A:G                                       | 1185  | A:A                                       | 679   |  |  |  |  |  |  |  |
| chr2 | 44517759       | 44517759     | SNV          | T                             | C:T                                       | 73    | C:C                                       | 3     |  |  |  |  |  |  |  |
| chr2 | 44517822       | 44517822     | insertion    | -                             | --T                                       | 931   | T:T                                       | 1203  |  |  |  |  |  |  |  |
| chr2 | 44517839       | 44517839     | SNV          | G                             | A:A                                       | 1204  | A:G                                       | 929   |  |  |  |  |  |  |  |
| chr2 | 44517933       | 44517933     | SNV          | T                             | C:T                                       | 2     |                                           | 0     |  |  |  |  |  |  |  |
| chr2 | 44518338       | 44518338     | SNV          | G                             | C:G                                       | 144   | C:C                                       | 6     |  |  |  |  |  |  |  |
| chr2 | 44518559       | 44518559     | SNV          | G                             | A:A                                       | 10    | A:G                                       | 156   |  |  |  |  |  |  |  |
| chr2 | 44518752       | 44518752     | SNV          | G                             | T:T                                       | 5     | G:T                                       | 139   |  |  |  |  |  |  |  |
| chr2 | 44518786       | 44518786     | SNV          | C                             | C:T                                       | 20    |                                           | 0     |  |  |  |  |  |  |  |
| chr2 | 44518866       | 44518866     | SNV          | G                             | A:G                                       | 3     |                                           | 0     |  |  |  |  |  |  |  |
| chr2 | 44519073       | 44519073     | SNV          | T                             | C:T                                       | 13    |                                           | 0     |  |  |  |  |  |  |  |
| chr2 | 44519142       | 44519142     | SNV          | A                             | G:G                                       | 980   | A:G                                       | 1077  |  |  |  |  |  |  |  |
| chr2 | 44519290       | 44519290     | SNV          | C                             | C:T                                       | 89    | T:T                                       | 6     |  |  |  |  |  |  |  |
| chr2 | 44519544       | 44519544     | SNV          | C                             | C:G                                       | 153   | G:G                                       | 12    |  |  |  |  |  |  |  |
| chr2 | 44519619       | 44519619     | SNV          | G                             | C:G                                       | 1     |                                           | 0     |  |  |  |  |  |  |  |
| chr2 | 44519713       | 44519713     | SNV          | C                             | T:T                                       | 1     | C:T                                       | 69    |  |  |  |  |  |  |  |
| chr2 | 44519751       | 44519751     | SNV          | C                             | C:T                                       | 31    |                                           | 0     |  |  |  |  |  |  |  |
| chr2 | 44519769       | 44519769     | SNV          | T                             | C:C                                       | 11    | C:T                                       | 122   |  |  |  |  |  |  |  |
| chr2 | 44519906       | 44519909     | deletion     | ATAT                          | --                                        | 3     | --ATAT                                    | 78    |  |  |  |  |  |  |  |
| chr2 | 44519981       | 44519981     | SNV          | C                             | C:T                                       | 1     |                                           | 0     |  |  |  |  |  |  |  |
| chr2 | 44520053       | 44520053     | SNV          | C                             | C:T                                       | 21    |                                           | 0     |  |  |  |  |  |  |  |
| chr2 | 44520285       | 44520285     | SNV          | G                             | C:G                                       | 10    |                                           | 0     |  |  |  |  |  |  |  |
| chr2 | 44520657       | 44520657     | deletion     | G                             | --G                                       | 1106  | --                                        | 859   |  |  |  |  |  |  |  |
| chr2 | 44520662       | 44520662     | SNV          | G                             | A:A                                       | 105   | A:G                                       | 573   |  |  |  |  |  |  |  |
| chr2 | 44520716       | 44520716     | SNV          | A                             | A:G                                       | 932   | G:G                                       | 1177  |  |  |  |  |  |  |  |
| chr2 | 44520774       | 44520775     | deletion     | GA                            | --GA                                      | 4     |                                           | 0     |  |  |  |  |  |  |  |
| chr2 | 44521098       | 44521098     | insertion    | -                             | G:G                                       | 1468  | --G                                       | 746   |  |  |  |  |  |  |  |
| chr2 | 44521107       | 44521107     | SNV          | C                             | C:G                                       | 2     |                                           | 0     |  |  |  |  |  |  |  |
| chr2 | 44521146       | 44521146     | SNV          | G                             | A:G                                       | 5     |                                           | 0     |  |  |  |  |  |  |  |
| chr2 | 44521176       | 44521176     | SNV          | C                             | C:T                                       | 6     |                                           | 0     |  |  |  |  |  |  |  |
| chr2 | 44521246       | 44521246     | SNV          | A                             | G:G                                       | 1473  | A:G                                       | 741   |  |  |  |  |  |  |  |
| chr2 | 44521544       | 44521544     | SNV          | T                             | C:C                                       | 1407  | C:T                                       | 785   |  |  |  |  |  |  |  |

Supplementary Table 1. Variants of SLC3A1 in the 1KG database

| Chr  | Start Position | End Position | Variant type | Ref Genotype   Ref Proteotype | Variant Genotype 1   Variant Proteotype 1 | Count | Variant Genotype 2   Variant Proteotype 2 | Count |  |  |  |  |  |  |  |
|------|----------------|--------------|--------------|-------------------------------|-------------------------------------------|-------|-------------------------------------------|-------|--|--|--|--|--|--|--|
| chr2 | 44521608       | 44521608     | SNV          | C                             | C:T                                       | 19    |                                           | 0     |  |  |  |  |  |  |  |
| chr2 | 44521642       | 44521646     | deletion     | AAAAA                         | --AAAAA                                   | 5     |                                           | 0     |  |  |  |  |  |  |  |
| chr2 | 44521764       | 44521764     | SNV          | A                             | G:G                                       | 1     | A:G                                       | 19    |  |  |  |  |  |  |  |
| chr2 | 44521978       | 44521978     | SNV          | C                             | A:C                                       | 1     |                                           | 0     |  |  |  |  |  |  |  |
| chr2 | 44522280       | 44522280     | SNV          | G                             | A:G                                       | 28    |                                           | 0     |  |  |  |  |  |  |  |
| chr2 | 44522449       | 44522449     | SNV          | G                             | A:G                                       | 1     |                                           | 0     |  |  |  |  |  |  |  |
| chr2 | 44522522       | 44522522     | SNV          | C                             | C:G                                       | 1     |                                           | 0     |  |  |  |  |  |  |  |
| chr2 | 44522560       | 44522560     | SNV          | G                             | C:G                                       | 15    | C:C                                       | 2     |  |  |  |  |  |  |  |
| chr2 | 44522624       | 44522624     | SNV          | T                             | G:T                                       | 1     |                                           | 0     |  |  |  |  |  |  |  |
| chr2 | 44522777       | 44522777     | SNV          | A                             | A:T                                       | 1     |                                           | 0     |  |  |  |  |  |  |  |
| chr2 | 44522805       | 44522805     | SNV          | C                             | C:T                                       | 19    | T:T                                       | 1     |  |  |  |  |  |  |  |
| chr2 | 44522822       | 44522822     | SNV          | G                             | A:G                                       | 32    |                                           | 0     |  |  |  |  |  |  |  |
| chr2 | 44522965       | 44522965     | SNV          | G                             | G:T                                       | 2     |                                           | 0     |  |  |  |  |  |  |  |
| chr2 | 44523059       | 44523059     | SNV          | G                             | A:G                                       | 2     |                                           | 0     |  |  |  |  |  |  |  |
| chr2 | 44523787       | 44523787     | SNV          | T                             | C:T                                       | 3     |                                           | 0     |  |  |  |  |  |  |  |
| chr2 | 44523908       | 44523908     | SNV          | A                             | A:T                                       | 29    | T:T                                       | 2     |  |  |  |  |  |  |  |
| chr2 | 44523966       | 44523966     | SNV          | C                             | C:G                                       | 3     |                                           | 0     |  |  |  |  |  |  |  |
| chr2 | 44523968       | 44523968     | SNV          | T                             | G:T                                       | 21    |                                           | 0     |  |  |  |  |  |  |  |
| chr2 | 44524064       | 44524064     | SNV          | G                             | A:G                                       | 1045  | A:A                                       | 581   |  |  |  |  |  |  |  |
| chr2 | 44524575       | 44524575     | SNV          | T                             | C:C                                       | 757   | C:T                                       | 1179  |  |  |  |  |  |  |  |
| chr2 | 44524603       | 44524603     | SNV          | A                             | A:G                                       | 5     |                                           | 0     |  |  |  |  |  |  |  |
| chr2 | 44524630       | 44524630     | SNV          | T                             | A:T                                       | 85    | A:A                                       | 6     |  |  |  |  |  |  |  |
| chr2 | 44524735       | 44524735     | SNV          | G                             | A:G                                       | 1     |                                           | 0     |  |  |  |  |  |  |  |
| chr2 | 44524765       | 44524765     | SNV          | C                             | C:T                                       | 34    |                                           | 0     |  |  |  |  |  |  |  |
| chr2 | 44524899       | 44524899     | SNV          | C                             | A:C                                       | 27    |                                           | 0     |  |  |  |  |  |  |  |
| chr2 | 44524936       | 44524936     | SNV          | T                             | A:A                                       | 1     | A:T                                       | 73    |  |  |  |  |  |  |  |
| chr2 | 44524945       | 44524945     | SNV          | C                             | T:T                                       | 16    | C:T                                       | 205   |  |  |  |  |  |  |  |
| chr2 | 44525023       | 44525023     | SNV          | C                             | C:T                                       | 4     |                                           | 0     |  |  |  |  |  |  |  |
| chr2 | 44525239       | 44525239     | SNV          | G                             | C:G                                       | 59    |                                           | 0     |  |  |  |  |  |  |  |
| chr2 | 44525299       | 44525299     | deletion     | C                             | --                                        | 1     | --C                                       | 72    |  |  |  |  |  |  |  |
| chr2 | 44525327       | 44525327     | deletion     | A                             | --                                        | 1169  | --A                                       | 946   |  |  |  |  |  |  |  |
| chr2 | 44525353       | 44525353     | SNV          | C                             | C:G                                       | 4     |                                           | 0     |  |  |  |  |  |  |  |
| chr2 | 44525355       | 44525355     | SNV          | T                             | C:C                                       | 1     | C:T                                       | 20    |  |  |  |  |  |  |  |
| chr2 | 44525475       | 44525475     | SNV          | C                             | C:T                                       | 1     |                                           | 0     |  |  |  |  |  |  |  |
| chr2 | 44525484       | 44525484     | SNV          | C                             | C:T                                       | 128   | T:T                                       | 5     |  |  |  |  |  |  |  |
| chr2 | 44525509       | 44525509     | SNV          | A                             | A:G                                       | 120   | G:G                                       | 11    |  |  |  |  |  |  |  |
| chr2 | 44525523       | 44525523     | insertion    | -                             | T:T                                       | 91    | --T                                       | 387   |  |  |  |  |  |  |  |
| chr2 | 44525640       | 44525640     | SNV          | C                             | C:T                                       | 10    |                                           | 0     |  |  |  |  |  |  |  |
| chr2 | 44525665       | 44525665     | SNV          | T                             | C:C                                       | 25    | C:T                                       | 305   |  |  |  |  |  |  |  |
| chr2 | 44525804       | 44525804     | SNV          | G                             | A:A                                       | 67    | A:G                                       | 363   |  |  |  |  |  |  |  |
| chr2 | 44525992       | 44525994     | deletion     | GAG                           | --GAG                                     | 31    |                                           | 0     |  |  |  |  |  |  |  |
| chr2 | 44526010       | 44526010     | SNV          | G                             | A:G                                       | 1184  | A:A                                       | 762   |  |  |  |  |  |  |  |
| chr2 | 44526073       | 44526073     | SNV          | A                             | A:G                                       | 11    |                                           | 0     |  |  |  |  |  |  |  |
| chr2 | 44526302       | 44526302     | SNV          | C                             | C:T                                       | 5     |                                           | 0     |  |  |  |  |  |  |  |
| chr2 | 44526336       | 44526336     | SNV          | C                             | C:T                                       | 288   | T:T                                       | 22    |  |  |  |  |  |  |  |
| chr2 | 44526405       | 44526405     | SNV          | T                             | C:T                                       | 9     |                                           | 0     |  |  |  |  |  |  |  |
| chr2 | 44526429       | 44526429     | SNV          | C                             | C:T                                       | 1     |                                           | 0     |  |  |  |  |  |  |  |
| chr2 | 44526531       | 44526531     | SNV          | T                             | C:C                                       | 70    | C:T                                       | 356   |  |  |  |  |  |  |  |
| chr2 | 44527069       | 44527069     | SNV          | C                             | C:T                                       | 1     |                                           | 0     |  |  |  |  |  |  |  |
| chr2 | 44527104       | 44527104     | SNV          | C                             | C:G                                       | 21    |                                           | 0     |  |  |  |  |  |  |  |
| chr2 | 44527274       | 44527274     | SNV          | T                             | C:T                                       | 1     |                                           | 0     |  |  |  |  |  |  |  |
| chr2 | 44527421       | 44527421     | SNV          | T                             | A:T                                       | 87    | A:A                                       | 6     |  |  |  |  |  |  |  |
| chr2 | 44527432       | 44527432     | SNV          | C                             | T:T                                       | 18    | C:T                                       | 254   |  |  |  |  |  |  |  |
| chr2 | 44527664       | 44527664     | SNV          | C                             | A:A                                       | 5     | A:C                                       | 144   |  |  |  |  |  |  |  |
| chr2 | 44528033       | 44528033     | SNV          | G                             | A:G                                       | 2     |                                           | 0     |  |  |  |  |  |  |  |
| chr2 | 44528078       | 44528078     | SNV          | T                             | G:T                                       | 11    |                                           | 0     |  |  |  |  |  |  |  |
| chr2 | 44528083       | 44528083     | SNV          | C                             | T:T                                       | 1     | C:T                                       | 11    |  |  |  |  |  |  |  |
| chr2 | 44528111       | 44528111     | SNV          | G                             | A:A                                       | 1     | A:G                                       | 57    |  |  |  |  |  |  |  |
| chr2 | 44528165       | 44528165     | SNV          | G E                           | A:G E:E                                   | 9     |                                           | 0     |  |  |  |  |  |  |  |
| chr2 | 44528256       | 44528256     | SNV          | G G                           | A:G S:G                                   | 7     |                                           | 0     |  |  |  |  |  |  |  |
| chr2 | 44528268       | 44528268     | deletion     | T                             | --                                        | 66    | --T                                       | 428   |  |  |  |  |  |  |  |
| chr2 | 44528492       | 44528492     | SNV          | C                             | C:T                                       | 11    | T:T                                       | 1     |  |  |  |  |  |  |  |
| chr2 | 44528571       | 44528571     | SNV          | T                             | A:T                                       | 181   | A:A                                       | 16    |  |  |  |  |  |  |  |
| chr2 | 44528602       | 44528602     | SNV          | G                             | A:A                                       | 5     | A:G                                       | 93    |  |  |  |  |  |  |  |
| chr2 | 44528662       | 44528662     | SNV          | G                             | A:G                                       | 2     |                                           | 0     |  |  |  |  |  |  |  |
| chr2 | 44528663       | 44528663     | SNV          | A                             | A:G                                       | 10    |                                           | 0     |  |  |  |  |  |  |  |
| chr2 | 44528681       | 44528681     | SNV          | C                             | G:G                                       | 17    | C:G                                       | 278   |  |  |  |  |  |  |  |
| chr2 | 44528697       | 44528697     | SNV          | G                             | A:A                                       | 16    | A:G                                       | 204   |  |  |  |  |  |  |  |
| chr2 | 44528877       | 44528877     | insertion    | -                             | A:A                                       | 544   | --A                                       | 1198  |  |  |  |  |  |  |  |
| chr2 | 44528922       | 44528922     | SNV          | C                             | C:G                                       | 506   | G:G                                       | 1937  |  |  |  |  |  |  |  |
| chr2 | 44529034       | 44529034     | insertion    | -                             | --CT                                      | 34    |                                           | 0     |  |  |  |  |  |  |  |
| chr2 | 44529117       | 44529117     | SNV          | C                             | T:T                                       | 1     | C:T                                       | 18    |  |  |  |  |  |  |  |
| chr2 | 44529152       | 44529152     | SNV          | C                             | G:G                                       | 1     | C:G                                       | 46    |  |  |  |  |  |  |  |
| chr2 | 44529244       | 44529245     | deletion     | TT                            | --                                        | 17    | --TT                                      | 277   |  |  |  |  |  |  |  |
| chr2 | 44529254       | 44529254     | SNV          | A                             | A:G                                       | 16    |                                           | 0     |  |  |  |  |  |  |  |
| chr2 | 44529428       | 44529428     | SNV          | C                             | C:T                                       | 46    | T:T                                       | 1     |  |  |  |  |  |  |  |
| chr2 | 44529449       | 44529453     | deletion     | ATTAA                         | --                                        | 5     | --ATTAA                                   | 145   |  |  |  |  |  |  |  |
| chr2 | 44529549       | 44529549     | SNV          | T                             | C:T                                       | 1     |                                           | 0     |  |  |  |  |  |  |  |
| chr2 | 44529589       | 44529589     | SNV          | A                             | A:C                                       | 6     |                                           | 0     |  |  |  |  |  |  |  |
| chr2 | 44529594       | 44529594     | SNV          | G                             | A:G                                       | 1     |                                           | 0     |  |  |  |  |  |  |  |
| chr2 | 44529628       | 44529628     | SNV          | T                             | G:T                                       | 3     |                                           | 0     |  |  |  |  |  |  |  |
| chr2 | 44529705       | 44529705     | SNV          | A                             | G:G                                       | 6     | A:G                                       | 92    |  |  |  |  |  |  |  |
| chr2 | 44529715       | 44529715     | SNV          | C                             | C:T                                       | 72    | T:T                                       | 1     |  |  |  |  |  |  |  |
| chr2 | 44529722       | 44529722     | SNV          | C                             | T:T                                       | 2     | C:T                                       | 62    |  |  |  |  |  |  |  |
| chr2 | 44529743       | 44529743     | SNV          | T                             | G:T                                       | 1     |                                           | 0     |  |  |  |  |  |  |  |
| chr2 | 44529789       | 44529789     | SNV          | T                             | C:C                                       | 5     | C:T                                       | 144   |  |  |  |  |  |  |  |
| chr2 | 44529855       | 44529855     | SNV          | C                             | C:G                                       | 1     |                                           | 0     |  |  |  |  |  |  |  |
| chr2 | 44529870       | 44529870     | SNV          | G                             | A:G                                       | 11    |                                           | 0     |  |  |  |  |  |  |  |
| chr2 | 44529914       | 44529914     | SNV          | A                             | A:C                                       | 18    | C:C                                       | 1     |  |  |  |  |  |  |  |
| chr2 | 44529973       | 44529973     | SNV          | G                             | A:A                                       | 15    | A:G                                       | 276   |  |  |  |  |  |  |  |
| chr2 | 44530084       | 44530084     | SNV          | T                             | A:A                                       | 22    | A:T                                       | 287   |  |  |  |  |  |  |  |
| chr2 | 44530156       | 44530156     | SNV          | G                             | A:G                                       | 1     |                                           | 0     |  |  |  |  |  |  |  |
| chr2 | 44530224       | 44530224     | SNV          | T                             | C:T                                       | 8     |                                           | 0     |  |  |  |  |  |  |  |
| chr2 | 44530321       | 44530326     | deletion     | TAAGAG                        | --TAAGAG                                  | 288   | --                                        | 22    |  |  |  |  |  |  |  |

Supplementary Table 1. Variants of SLC3A1 in the 1KG database

| Chr  | Start Position | End Position | Variant type | Ref Genotype   Ref Proteotype | Variant Genotype 1   Variant Proteotype 1 | Count | Variant Genotype 2   Variant Proteotype 2 | Count |  |  |  |  |  |  |
|------|----------------|--------------|--------------|-------------------------------|-------------------------------------------|-------|-------------------------------------------|-------|--|--|--|--|--|--|
| chr2 | 44530384       | 44530384     | insertion    | -                             | -:TT                                      | 1149  | TT:TT                                     | 855   |  |  |  |  |  |  |
| chr2 | 44530408       | 44530408     | SNV          | A                             | A:C                                       | 4     |                                           | 0     |  |  |  |  |  |  |
| chr2 | 44530423       | 44530423     | SNV          | C                             | T:T                                       | 993   | C:T                                       | 1071  |  |  |  |  |  |  |
| chr2 | 44530605       | 44530605     | SNV          | A                             | A:T                                       | 356   | T:T                                       | 39    |  |  |  |  |  |  |
| chr2 | 44530623       | 44530623     | SNV          | G                             | A:A                                       | 17    | A:G                                       | 277   |  |  |  |  |  |  |
| chr2 | 44530682       | 44530683     | deletion     | TG                            | -:-                                       | 5     | -:TG                                      | 92    |  |  |  |  |  |  |
| chr2 | 44530761       | 44530761     | SNV          | G                             | A:G                                       | 3     |                                           | 0     |  |  |  |  |  |  |
| chr2 | 44530827       | 44530827     | SNV          | G                             | A:A                                       | 1     | A:G                                       | 56    |  |  |  |  |  |  |
| chr2 | 44530894       | 44530894     | SNV          | G                             | A:G                                       | 70    | A:A                                       | 1     |  |  |  |  |  |  |
| chr2 | 44530929       | 44530929     | SNV          | C                             | C:G                                       | 51    | G:G                                       | 1     |  |  |  |  |  |  |
| chr2 | 44530931       | 44530931     | SNV          | C                             | C:T                                       | 3     |                                           | 0     |  |  |  |  |  |  |
| chr2 | 44530940       | 44530940     | SNV          | A                             | T:T                                       | 15    | A:T                                       | 168   |  |  |  |  |  |  |
| chr2 | 44530945       | 44530945     | SNV          | C                             | C:T                                       | 1     |                                           | 0     |  |  |  |  |  |  |
| chr2 | 44530948       | 44530948     | SNV          | C                             | T:T                                       | 5     | C:T                                       | 144   |  |  |  |  |  |  |
| chr2 | 44530965       | 44530965     | SNV          | C                             | C:T                                       | 280   | T:T                                       | 20    |  |  |  |  |  |  |
| chr2 | 44530985       | 44530985     | SNV          | T                             | C:T                                       | 6     |                                           | 0     |  |  |  |  |  |  |
| chr2 | 44531071       | 44531071     | SNV          | A                             | A:G                                       | 5     | G:G                                       | 1     |  |  |  |  |  |  |
| chr2 | 44531081       | 44531081     | SNV          | G                             | T:T                                       | 578   | G:T                                       | 1028  |  |  |  |  |  |  |
| chr2 | 44531484       | 44531484     | SNV          | C                             | T:T                                       | 764   | C:T                                       | 1186  |  |  |  |  |  |  |
| chr2 | 44531499       | 44531499     | SNV          | G                             | T:T                                       | 5     | G:T                                       | 145   |  |  |  |  |  |  |
| chr2 | 44531633       | 44531633     | SNV          | G                             | C:G                                       | 28    |                                           | 0     |  |  |  |  |  |  |
| chr2 | 44531635       | 44531635     | SNV          | T                             | C:C                                       | 74    | C:T                                       | 383   |  |  |  |  |  |  |
| chr2 | 44531703       | 44531703     | SNV          | C                             | C:T                                       | 35    |                                           | 0     |  |  |  |  |  |  |
| chr2 | 44531842       | 44531843     | deletion     | TG                            | -:TG                                      | 22    |                                           | 0     |  |  |  |  |  |  |
| chr2 | 44531849       | 44531849     | SNV          | A                             | A:T                                       | 1     |                                           | 0     |  |  |  |  |  |  |
| chr2 | 44531852       | 44531852     | SNV          | C                             | C:T                                       | 6     |                                           | 0     |  |  |  |  |  |  |
| chr2 | 44531859       | 44531859     | SNV          | T                             | G:T                                       | 12    | G:G                                       | 2     |  |  |  |  |  |  |
| chr2 | 44531952       | 44531952     | insertion    | -                             | -:T                                       | 108   | T:T                                       | 1     |  |  |  |  |  |  |
| chr2 | 44532326       | 44532326     | SNV          | C                             | T:T                                       | 31    | C:T                                       | 271   |  |  |  |  |  |  |
| chr2 | 44532550       | 44532550     | SNV          | A                             | A:C                                       | 10    |                                           | 0     |  |  |  |  |  |  |
| chr2 | 44532553       | 44532556     | deletion     | CTTT                          | -:-                                       | 5     | -:CTTT                                    | 145   |  |  |  |  |  |  |
| chr2 | 44532567       | 44532568     | deletion     | TT                            | -:-                                       | 1214  | -:TT                                      | 924   |  |  |  |  |  |  |
| chr2 | 44532627       | 44532627     | SNV          | C                             | T:T                                       | 2     | C:T                                       | 79    |  |  |  |  |  |  |
| chr2 | 44532641       | 44532641     | SNV          | A                             | A:C                                       | 3     |                                           | 0     |  |  |  |  |  |  |
| chr2 | 44532838       | 44532838     | SNV          | G                             | A:G                                       | 178   | A:A                                       | 16    |  |  |  |  |  |  |
| chr2 | 44532850       | 44532850     | SNV          | G                             | C:G                                       | 17    |                                           | 0     |  |  |  |  |  |  |
| chr2 | 44532858       | 44532858     | SNV          | A                             | A:C                                       | 12    |                                           | 0     |  |  |  |  |  |  |
| chr2 | 44532947       | 44532947     | SNV          | C                             | C:G                                       | 10    |                                           | 0     |  |  |  |  |  |  |
| chr2 | 44532996       | 44532996     | SNV          | G                             | A:G                                       | 5     |                                           | 0     |  |  |  |  |  |  |
| chr2 | 44533055       | 44533055     | SNV          | T                             | C:T                                       | 1     |                                           | 0     |  |  |  |  |  |  |
| chr2 | 44533067       | 44533067     | SNV          | C                             | C:T                                       | 2     |                                           | 0     |  |  |  |  |  |  |
| chr2 | 44533104       | 44533104     | SNV          | G                             | G:T                                       | 9     |                                           | 0     |  |  |  |  |  |  |
| chr2 | 44533124       | 44533124     | SNV          | G                             | C:G                                       | 50    | C:C                                       | 1     |  |  |  |  |  |  |
| chr2 | 44533210       | 44533210     | SNV          | T                             | G:T                                       | 10    |                                           | 0     |  |  |  |  |  |  |
| chr2 | 44533279       | 44533279     | SNV          | G                             | T:T                                       | 4     | G:T                                       | 129   |  |  |  |  |  |  |
| chr2 | 44533397       | 44533397     | SNV          | G                             | A:G                                       | 144   | A:A                                       | 5     |  |  |  |  |  |  |
| chr2 | 44533663       | 44533663     | SNV          | C                             | C:T                                       | 95    | T:T                                       | 4     |  |  |  |  |  |  |
| chr2 | 44533690       | 44533690     | deletion     | T                             | -:-                                       | 526   | -:T                                       | 1234  |  |  |  |  |  |  |
| chr2 | 44533725       | 44533725     | SNV          | G                             | C:G                                       | 72    | C:C                                       | 1     |  |  |  |  |  |  |
| chr2 | 44533733       | 44533733     | SNV          | C                             | C:T                                       | 93    | T:T                                       | 4     |  |  |  |  |  |  |
| chr2 | 44533754       | 44533754     | SNV          | G                             | A:G                                       | 3     |                                           | 0     |  |  |  |  |  |  |
| chr2 | 44533800       | 44533802     | deletion     | CTC                           | -:CTC                                     | 3     |                                           | 0     |  |  |  |  |  |  |
| chr2 | 44533946       | 44533946     | SNV          | T                             | C:C                                       | 18    | C:T                                       | 245   |  |  |  |  |  |  |
| chr2 | 44533965       | 44533965     | SNV          | G                             | A:G                                       | 1     |                                           | 0     |  |  |  |  |  |  |
| chr2 | 44534012       | 44534012     | SNV          | A                             | A:C                                       | 1059  | C:C                                       | 601   |  |  |  |  |  |  |
| chr2 | 44534042       | 44534042     | SNV          | A                             | A:T                                       | 2     |                                           | 0     |  |  |  |  |  |  |
| chr2 | 44534132       | 44534132     | SNV          | G                             | A:G                                       | 1     |                                           | 0     |  |  |  |  |  |  |
| chr2 | 44534160       | 44534160     | SNV          | G                             | C:G                                       | 5     |                                           | 0     |  |  |  |  |  |  |
| chr2 | 44534186       | 44534186     | SNV          | C                             | A:C                                       | 1     |                                           | 0     |  |  |  |  |  |  |
| chr2 | 44534187       | 44534187     | SNV          | C                             | T:T                                       | 1     | C:T                                       | 72    |  |  |  |  |  |  |
| chr2 | 44534321       | 44534321     | SNV          | C                             | A:C                                       | 882   | A:A                                       | 390   |  |  |  |  |  |  |
| chr2 | 44534359       | 44534359     | SNV          | C                             | A:C                                       | 275   | A:A                                       | 32    |  |  |  |  |  |  |
| chr2 | 44534377       | 44534377     | SNV          | C                             | C:T                                       | 1     |                                           | 0     |  |  |  |  |  |  |
| chr2 | 44534391       | 44534391     | SNV          | G                             | C:G                                       | 1     |                                           | 0     |  |  |  |  |  |  |
| chr2 | 44534414       | 44534414     | SNV          | T                             | C:T                                       | 108   | C:C                                       | 2     |  |  |  |  |  |  |
| chr2 | 44534417       | 44534417     | SNV          | C                             | C:T                                       | 697   | T:T                                       | 1516  |  |  |  |  |  |  |
| chr2 | 44534502       | 44534502     | SNV          | T                             | C:T                                       | 38    |                                           | 0     |  |  |  |  |  |  |
| chr2 | 44534704       | 44534704     | deletion     | T                             | -:-                                       | 66    | -:T                                       | 1664  |  |  |  |  |  |  |
| chr2 | 44534852       | 44534852     | SNV          | G                             | T:T                                       | 1     | G:T                                       | 47    |  |  |  |  |  |  |
| chr2 | 44535034       | 44535034     | SNV          | T                             | C:T                                       | 128   | C:C                                       | 4     |  |  |  |  |  |  |
| chr2 | 44535069       | 44535069     | SNV          | A                             | A:G                                       | 1     |                                           | 0     |  |  |  |  |  |  |
| chr2 | 44535288       | 44535288     | SNV          | C                             | C:G                                       | 26    |                                           | 0     |  |  |  |  |  |  |
| chr2 | 44535347       | 44535347     | SNV          | A                             | G:G                                       | 2     | A:G                                       | 49    |  |  |  |  |  |  |
| chr2 | 44535365       | 44535365     | SNV          | C                             | C:G                                       | 7     |                                           | 0     |  |  |  |  |  |  |
| chr2 | 44535413       | 44535413     | SNV          | G                             | A:G                                       | 4     |                                           | 0     |  |  |  |  |  |  |
| chr2 | 44535454       | 44535454     | SNV          | T                             | A:T                                       | 13    |                                           | 0     |  |  |  |  |  |  |
| chr2 | 44535467       | 44535467     | SNV          | G                             | C:G                                       | 21    |                                           | 0     |  |  |  |  |  |  |
| chr2 | 44535519       | 44535519     | SNV          | G                             | C:C                                       | 392   | C:G                                       | 840   |  |  |  |  |  |  |
| chr2 | 44535643       | 44535645     | deletion     | TGT                           | -:TGT                                     | 7     |                                           | 0     |  |  |  |  |  |  |
| chr2 | 44535686       | 44535686     | SNV          | G                             | A:A                                       | 1268  | A:G                                       | 877   |  |  |  |  |  |  |
| chr2 | 44535694       | 44535694     | SNV          | C                             | C:T                                       | 210   | T:T                                       | 16    |  |  |  |  |  |  |
| chr2 | 44535715       | 44535715     | SNV          | T                             | C:T                                       | 1     |                                           | 0     |  |  |  |  |  |  |
| chr2 | 44535738       | 44535738     | SNV          | G                             | G:T                                       | 270   | T:T                                       | 27    |  |  |  |  |  |  |
| chr2 | 44535866       | 44535866     | SNV          | G                             | A:G                                       | 10    |                                           | 0     |  |  |  |  |  |  |
| chr2 | 44535896       | 44535896     | SNV          | G                             | C:G                                       | 10    |                                           | 0     |  |  |  |  |  |  |
| chr2 | 44535938       | 44535942     | deletion     | CTCAG                         | -:-                                       | 5     | -:CTCAG                                   | 144   |  |  |  |  |  |  |
| chr2 | 44535957       | 44535957     | SNV          | C                             | C:T                                       | 5     |                                           | 0     |  |  |  |  |  |  |
| chr2 | 44535958       | 44535958     | SNV          | G                             | A:G                                       | 265   | A:A                                       | 25    |  |  |  |  |  |  |
| chr2 | 44535964       | 44535964     | SNV          | C                             | C:T                                       | 5     |                                           | 0     |  |  |  |  |  |  |
| chr2 | 44535975       | 44535975     | SNV          | C                             | T:T                                       | 1     | C:T                                       | 31    |  |  |  |  |  |  |
| chr2 | 44535984       | 44535984     | SNV          | G                             | C:G                                       | 22    |                                           | 0     |  |  |  |  |  |  |
| chr2 | 44536223       | 44536223     | SNV          | T                             | G:T                                       | 1     |                                           | 0     |  |  |  |  |  |  |
| chr2 | 44536249       | 44536249     | SNV          | A                             | G:G                                       | 627   | A:G                                       | 1104  |  |  |  |  |  |  |
| chr2 | 44536362       | 44536362     | SNV          | C                             | A:A                                       | 13    | A:C                                       | 217   |  |  |  |  |  |  |

Supplementary Table 1. Variants of SLC3A1 in the 1KG database

| Chr  | Start Position | End Position | Variant type | Ref Genotype   Ref Proteotype | Variant Genotype 1   Variant Proteotype 1 | Count | Variant Genotype 2   Variant Proteotype 2 | Count |  |  |  |  |  |  |
|------|----------------|--------------|--------------|-------------------------------|-------------------------------------------|-------|-------------------------------------------|-------|--|--|--|--|--|--|
| chr2 | 44536372       | 44536372     | SNV          | C                             | C:G                                       | 35    |                                           | 0     |  |  |  |  |  |  |
| chr2 | 44536546       | 44536546     | SNV          | T                             | C:C                                       | 845   |                                           | 1169  |  |  |  |  |  |  |
| chr2 | 44536634       | 44536634     | deletion     | G                             | --                                        | 17    | -:G                                       | 235   |  |  |  |  |  |  |
| chr2 | 44536677       | 44536677     | SNV          | C                             | T:T                                       | 1     | C:T                                       | 51    |  |  |  |  |  |  |
| chr2 | 44536704       | 44536704     | SNV          | T                             | C:T                                       | 6     |                                           | 0     |  |  |  |  |  |  |
| chr2 | 44536706       | 44536706     | SNV          | C                             | C:T                                       | 45    |                                           | 0     |  |  |  |  |  |  |
| chr2 | 44536716       | 44536716     | SNV          | G                             | G:T                                       | 63    | T:T                                       | 1     |  |  |  |  |  |  |
| chr2 | 44536757       | 44536757     | SNV          | G                             | A:G                                       | 1     |                                           | 0     |  |  |  |  |  |  |
| chr2 | 44536807       | 44536807     | SNV          | C                             | T:T                                       | 1     | C:T                                       | 20    |  |  |  |  |  |  |
| chr2 | 44536821       | 44536821     | SNV          | C                             | G:G                                       | 1     | C:G                                       | 61    |  |  |  |  |  |  |
| chr2 | 44536893       | 44536893     | insertion    | -                             | --TGAC                                    | 16    |                                           | 0     |  |  |  |  |  |  |
| chr2 | 44536928       | 44536928     | SNV          | G                             | G:T                                       | 263   | T:T                                       | 15    |  |  |  |  |  |  |
| chr2 | 44537028       | 44537028     | SNV          | T                             | G:T                                       | 7     |                                           | 0     |  |  |  |  |  |  |
| chr2 | 44537036       | 44537036     | insertion    | -                             | T:T                                       | 14    | -:T                                       | 204   |  |  |  |  |  |  |
| chr2 | 44537145       | 44537145     | SNV          | A                             | A:C                                       | 10    |                                           | 0     |  |  |  |  |  |  |
| chr2 | 44537157       | 44537157     | SNV          | A                             | A:C                                       | 9     |                                           | 0     |  |  |  |  |  |  |
| chr2 | 44537222       | 44537222     | deletion     | G                             | -:G                                       | 3     |                                           | 0     |  |  |  |  |  |  |
| chr2 | 44537288       | 44537288     | SNV          | C                             | C:T                                       | 1     |                                           | 0     |  |  |  |  |  |  |
| chr2 | 44537296       | 44537296     | SNV          | T                             | A:T                                       | 9     |                                           | 0     |  |  |  |  |  |  |
| chr2 | 44537397       | 44537397     | SNV          | G                             | A:G                                       | 30    | A:A                                       | 2     |  |  |  |  |  |  |
| chr2 | 44537422       | 44537422     | SNV          | C                             | C:T                                       | 10    |                                           | 0     |  |  |  |  |  |  |
| chr2 | 44537568       | 44537571     | deletion     | TTCT                          | --                                        | 5     | --TTCT                                    | 144   |  |  |  |  |  |  |
| chr2 | 44537586       | 44537586     | SNV          | T                             | C:T                                       | 9     |                                           | 0     |  |  |  |  |  |  |
| chr2 | 44537702       | 44537702     | SNV          | T                             | C:T                                       | 1     |                                           | 0     |  |  |  |  |  |  |
| chr2 | 44537742       | 44537742     | SNV          | G                             | A:A                                       | 1     | A:G                                       | 63    |  |  |  |  |  |  |
| chr2 | 44537821       | 44537821     | SNV          | G                             | A:G                                       | 27    |                                           | 0     |  |  |  |  |  |  |
| chr2 | 44537828       | 44537828     | SNV          | G                             | G:T                                       | 2     |                                           | 0     |  |  |  |  |  |  |
| chr2 | 44537829       | 44537829     | SNV          | C                             | A:A                                       | 1     | A:C                                       | 13    |  |  |  |  |  |  |
| chr2 | 44537831       | 44537831     | insertion    | -                             | T:T                                       | 4     | -:T                                       | 175   |  |  |  |  |  |  |
| chr2 | 44537916       | 44537916     | SNV          | T                             | C:T                                       | 1     |                                           | 0     |  |  |  |  |  |  |
| chr2 | 44537978       | 44537978     | SNV          | C                             | C:T                                       | 24    | T:T                                       | 2     |  |  |  |  |  |  |
| chr2 | 44538080       | 44538080     | SNV          | C                             | C:T                                       | 285   | T:T                                       | 20    |  |  |  |  |  |  |
| chr2 | 44538237       | 44538239     | deletion     | TTC                           | --TTC                                     | 44    |                                           | 0     |  |  |  |  |  |  |
| chr2 | 44538326       | 44538326     | SNV          | T                             | A:T                                       | 1     |                                           | 0     |  |  |  |  |  |  |
| chr2 | 44538484       | 44538484     | SNV          | A                             | A:G                                       | 864   | G:G                                       | 1291  |  |  |  |  |  |  |
| chr2 | 44538534       | 44538534     | SNV          | T                             | C:T                                       | 5     |                                           | 0     |  |  |  |  |  |  |
| chr2 | 44538634       | 44538634     | SNV          | G                             | A:G                                       | 2     |                                           | 0     |  |  |  |  |  |  |
| chr2 | 44538733       | 44538733     | SNV          | G                             | A:G                                       | 53    | A:A                                       | 1     |  |  |  |  |  |  |
| chr2 | 44538862       | 44538862     | insertion    | -                             | A:A                                       | 810   | -:A                                       | 1229  |  |  |  |  |  |  |
| chr2 | 44538876       | 44538876     | SNV          | C                             | A:C                                       | 413   | A:A                                       | 19    |  |  |  |  |  |  |
| chr2 | 44538929       | 44538929     | SNV          | G                             | G:T                                       | 16    | T:T                                       | 1     |  |  |  |  |  |  |
| chr2 | 44538932       | 44538932     | SNV          | C                             | C:T                                       | 84    | T:T                                       | 4     |  |  |  |  |  |  |
| chr2 | 44538936       | 44538936     | SNV          | C                             | T:T                                       | 1     | C:T                                       | 73    |  |  |  |  |  |  |
| chr2 | 44538963       | 44538963     | SNV          | G                             | A:A                                       | 18    | A:G                                       | 262   |  |  |  |  |  |  |
| chr2 | 44539009       | 44539009     | SNV          | C                             | T:T                                       | 1270  | C:T                                       | 875   |  |  |  |  |  |  |
| chr2 | 44539041       | 44539041     | SNV          | A                             | G:G                                       | 939   | A:G                                       | 1098  |  |  |  |  |  |  |
| chr2 | 44539207       | 44539207     | SNV          | C                             | C:T                                       | 9     |                                           | 0     |  |  |  |  |  |  |
| chr2 | 44539287       | 44539287     | SNV          | T                             | G:T                                       | 150   | G:G                                       | 5     |  |  |  |  |  |  |
| chr2 | 44539306       | 44539306     | SNV          | T                             | C:T                                       | 270   | C:C                                       | 52    |  |  |  |  |  |  |
| chr2 | 44539418       | 44539418     | SNV          | T                             | G:T                                       | 16    |                                           | 0     |  |  |  |  |  |  |
| chr2 | 44539423       | 44539423     | SNV          | C                             | A:C                                       | 1     |                                           | 0     |  |  |  |  |  |  |
| chr2 | 44539514       | 44539514     | SNV          | C                             | C:T                                       | 15    |                                           | 0     |  |  |  |  |  |  |
| chr2 | 44539758       | 44539758     | SNV          | C R                           | C:T R:C                                   | 1     |                                           | 0     |  |  |  |  |  |  |
| chr2 | 44539865       | 44539865     | SNV          | C A                           | C:T A:A                                   | 1     |                                           | 0     |  |  |  |  |  |  |
| chr2 | 44539913       | 44539913     | insertion    | -                             | --AGCTATAAATCAAG                          | 147   | AGCTATAAATCAAG:AGCTATAAATCAAG             | 5     |  |  |  |  |  |  |
| chr2 | 44540028       | 44540028     | SNV          | A                             | A:T                                       | 1     |                                           | 0     |  |  |  |  |  |  |
| chr2 | 44540072       | 44540072     | SNV          | A                             | A:G                                       | 1     |                                           | 0     |  |  |  |  |  |  |
| chr2 | 44540112       | 44540112     | SNV          | T                             | A:T                                       | 4     |                                           | 0     |  |  |  |  |  |  |
| chr2 | 44540180       | 44540180     | SNV          | G                             | C:C                                       | 1     | C:G                                       | 77    |  |  |  |  |  |  |
| chr2 | 44540219       | 44540219     | SNV          | G                             | A:A                                       | 2     | A:G                                       | 87    |  |  |  |  |  |  |
| chr2 | 44540241       | 44540241     | SNV          | C                             | T:T                                       | 1196  | C:T                                       | 930   |  |  |  |  |  |  |
| chr2 | 44540341       | 44540341     | SNV          | T                             | A:T                                       | 1     |                                           | 0     |  |  |  |  |  |  |
| chr2 | 44540361       | 44540361     | SNV          | A                             | A:C                                       | 1     |                                           | 0     |  |  |  |  |  |  |
| chr2 | 44540405       | 44540405     | SNV          | G                             | C:G                                       | 201   | C:C                                       | 15    |  |  |  |  |  |  |
| chr2 | 44540455       | 44540455     | SNV          | C                             | A:C                                       | 6     |                                           | 0     |  |  |  |  |  |  |
| chr2 | 44540519       | 44540519     | insertion    | -                             | -:C                                       | 10    |                                           | 0     |  |  |  |  |  |  |
| chr2 | 44540548       | 44540548     | SNV          | G                             | A:G                                       | 76    | A:A                                       | 4     |  |  |  |  |  |  |
| chr2 | 44540581       | 44540581     | SNV          | C                             | C:T                                       | 49    | T:T                                       | 1     |  |  |  |  |  |  |
| chr2 | 44540677       | 44540677     | SNV          | C                             | C:T                                       | 1     |                                           | 0     |  |  |  |  |  |  |
| chr2 | 44540766       | 44540766     | SNV          | A                             | A:C                                       | 1     |                                           | 0     |  |  |  |  |  |  |
| chr2 | 44540807       | 44540807     | SNV          | A                             | A:G                                       | 1     |                                           | 0     |  |  |  |  |  |  |
| chr2 | 44540874       | 44540874     | SNV          | G                             | C:G                                       | 3     |                                           | 0     |  |  |  |  |  |  |
| chr2 | 44541045       | 44541045     | SNV          | C N                           | C:T N:N                                   | 9     |                                           | 0     |  |  |  |  |  |  |
| chr2 | 44541170       | 44541170     | SNV          | T                             | A:T                                       | 1     |                                           | 0     |  |  |  |  |  |  |
| chr2 | 44541257       | 44541257     | SNV          | T                             | C:T                                       | 18    |                                           | 0     |  |  |  |  |  |  |
| chr2 | 44541302       | 44541302     | SNV          | A                             | A:G                                       | 9     |                                           | 0     |  |  |  |  |  |  |
| chr2 | 44541342       | 44541342     | SNV          | C                             | C:G                                       | 144   | G:G                                       | 5     |  |  |  |  |  |  |
| chr2 | 44541512       | 44541512     | SNV          | C                             | C:T                                       | 86    | T:T                                       | 2     |  |  |  |  |  |  |
| chr2 | 44541688       | 44541688     | SNV          | A                             | A:G                                       | 56    | G:G                                       | 1     |  |  |  |  |  |  |
| chr2 | 44541706       | 44541706     | SNV          | G                             | C:G                                       | 873   | C:C                                       | 1276  |  |  |  |  |  |  |
| chr2 | 44541725       | 44541725     | SNV          | C                             | C:T                                       | 1191  | T:T                                       | 778   |  |  |  |  |  |  |
| chr2 | 44541804       | 44541804     | SNV          | A                             | A:G                                       | 27    |                                           | 0     |  |  |  |  |  |  |
| chr2 | 44541844       | 44541844     | SNV          | G                             | G:T                                       | 4     |                                           | 0     |  |  |  |  |  |  |
| chr2 | 44541857       | 44541857     | SNV          | C                             | G:G                                       | 16    | C:G                                       | 282   |  |  |  |  |  |  |
| chr2 | 44541896       | 44541896     | SNV          | T                             | C:T                                       | 74    | C:C                                       | 1     |  |  |  |  |  |  |
| chr2 | 44541918       | 44541919     | deletion     | AT                            | --                                        | 783   | --AT                                      | 1188  |  |  |  |  |  |  |
| chr2 | 44541997       | 44541997     | SNV          | T                             | G:G                                       | 1     | G:T                                       | 75    |  |  |  |  |  |  |
| chr2 | 44542039       | 44542039     | SNV          | G                             | A:A                                       | 1     | A:G                                       | 35    |  |  |  |  |  |  |
| chr2 | 44542062       | 44542073     | deletion     | TTTTTTTTTTT                   | --TTTTTTTTTTT                             | 1112  | --                                        | 840   |  |  |  |  |  |  |
| chr2 | 44542147       | 44542147     | SNV          | C                             | C:T                                       | 172   | T:T                                       | 13    |  |  |  |  |  |  |
| chr2 | 44542161       | 44542161     | SNV          | C                             | C:G                                       | 104   | G:G                                       | 1     |  |  |  |  |  |  |
| chr2 | 44542219       | 44542219     | SNV          | C                             | T:T                                       | 2     | C:T                                       | 109   |  |  |  |  |  |  |
| chr2 | 44542284       | 44542284     | SNV          | G                             | A:G                                       | 29    |                                           | 0     |  |  |  |  |  |  |
| chr2 | 44542640       | 44542640     | SNV          | G                             | A:A                                       | 5     | A:G                                       | 144   |  |  |  |  |  |  |

Supplementary Table 1. Variants of SLC3A1 in the 1KG database

| Chr  | Start Position | End Position | Variant type | Ref Genotype   Ref Proteotype | Variant Genotype 1   Variant Proteotype 1 | Count | Variant Genotype 2   Variant Proteotype 2 | Count |  |  |  |  |  |  |  |
|------|----------------|--------------|--------------|-------------------------------|-------------------------------------------|-------|-------------------------------------------|-------|--|--|--|--|--|--|--|
| chr2 | 44542643       | 44542643     | deletion     | A                             | -A                                        | 961   | :-                                        | 1212  |  |  |  |  |  |  |  |
| chr2 | 44542712       | 44542712     | SNV          | C                             | C:T                                       | 1     |                                           | 0     |  |  |  |  |  |  |  |
| chr2 | 44542734       | 44542734     | SNV          | G                             | C:G                                       | 9     |                                           | 0     |  |  |  |  |  |  |  |
| chr2 | 44542737       | 44542737     | SNV          | G                             | C:G                                       | 19    |                                           | 0     |  |  |  |  |  |  |  |
| chr2 | 44542817       | 44542817     | SNV          | A                             | A:G                                       | 1     |                                           | 0     |  |  |  |  |  |  |  |
| chr2 | 44542863       | 44542863     | SNV          | T                             | G:T                                       | 35    |                                           | 0     |  |  |  |  |  |  |  |
| chr2 | 44542951       | 44542953     | deletion     | TGG                           | -:-                                       | 1     | :-TGG                                     | 63    |  |  |  |  |  |  |  |
| chr2 | 44543023       | 44543023     | SNV          | G                             | C:G                                       | 221   | C:C                                       | 16    |  |  |  |  |  |  |  |
| chr2 | 44543097       | 44543097     | SNV          | C                             | A:C                                       | 34    |                                           | 0     |  |  |  |  |  |  |  |
| chr2 | 44543125       | 44543125     | SNV          | C                             | C:G                                       | 859   | G:G                                       | 1290  |  |  |  |  |  |  |  |
| chr2 | 44543243       | 44543243     | SNV          | G                             | A:G                                       | 70    | A:A                                       | 1     |  |  |  |  |  |  |  |
| chr2 | 44543303       | 44543303     | SNV          | C                             | C:G                                       | 93    | G:G                                       | 5     |  |  |  |  |  |  |  |
| chr2 | 44543317       | 44543317     | SNV          | C                             | C:T                                       | 886   | T:T                                       | 1256  |  |  |  |  |  |  |  |
| chr2 | 44543389       | 44543389     | SNV          | T                             | A:T                                       | 1090  | A:A                                       | 593   |  |  |  |  |  |  |  |
| chr2 | 44543434       | 44543434     | SNV          | G                             | C:G                                       | 22    |                                           | 0     |  |  |  |  |  |  |  |
| chr2 | 44543595       | 44543598     | deletion     | AAAG                          | -:-                                       | 5     | :-AAAG                                    | 144   |  |  |  |  |  |  |  |
| chr2 | 44543671       | 44543671     | SNV          | T                             | C:T                                       | 5     |                                           | 0     |  |  |  |  |  |  |  |
| chr2 | 44544024       | 44544024     | SNV          | A                             | A:G                                       | 27    |                                           | 0     |  |  |  |  |  |  |  |
| chr2 | 44544115       | 44544115     | SNV          | T                             | A:A                                       | 15    | A:T                                       | 225   |  |  |  |  |  |  |  |
| chr2 | 44544174       | 44544174     | SNV          | G                             | A:A                                       | 5     | A:G                                       | 145   |  |  |  |  |  |  |  |
| chr2 | 44544230       | 44544230     | SNV          | A                             | A:G                                       | 34    |                                           | 0     |  |  |  |  |  |  |  |
| chr2 | 44544264       | 44544264     | SNV          | C                             | C:G                                       | 145   | G:G                                       | 5     |  |  |  |  |  |  |  |
| chr2 | 44544340       | 44544340     | SNV          | G                             | A:A                                       | 1     | A:G                                       | 70    |  |  |  |  |  |  |  |
| chr2 | 44544478       | 44544478     | SNV          | G                             | T:T                                       | 1     | G:T                                       | 106   |  |  |  |  |  |  |  |
| chr2 | 44544511       | 44544511     | SNV          | G                             | A:G                                       | 1     |                                           | 0     |  |  |  |  |  |  |  |
| chr2 | 44544592       | 44544592     | SNV          | T                             | C:T                                       | 9     |                                           | 0     |  |  |  |  |  |  |  |
| chr2 | 44544598       | 44544598     | insertion    | -                             | -:AA                                      | 1212  | AA:AA                                     | 818   |  |  |  |  |  |  |  |
| chr2 | 44544785       | 44544785     | SNV          | T                             | A:T                                       | 38    | A:A                                       | 1     |  |  |  |  |  |  |  |
| chr2 | 44544857       | 44544857     | SNV          | G                             | C:G                                       | 6     |                                           | 0     |  |  |  |  |  |  |  |
| chr2 | 44544901       | 44544901     | SNV          | T                             | G:T                                       | 2     |                                           | 0     |  |  |  |  |  |  |  |
| chr2 | 44544914       | 44544914     | SNV          | A                             | A:C                                       | 276   | C:C                                       | 13    |  |  |  |  |  |  |  |
| chr2 | 44544936       | 44544936     | SNV          | C                             | C:T                                       | 17    |                                           | 0     |  |  |  |  |  |  |  |
| chr2 | 44544949       | 44544949     | SNV          | G                             | A:A                                       | 1     | A:G                                       | 51    |  |  |  |  |  |  |  |
| chr2 | 44544955       | 44544955     | SNV          | G                             | A:G                                       | 1190  | A:A                                       | 800   |  |  |  |  |  |  |  |
| chr2 | 44545036       | 44545036     | SNV          | A                             | A:G                                       | 6     |                                           | 0     |  |  |  |  |  |  |  |
| chr2 | 44545076       | 44545076     | SNV          | T                             | C:C                                       | 1     | C:T                                       | 26    |  |  |  |  |  |  |  |
| chr2 | 44545099       | 44545101     | deletion     | AAT                           | -:AAT                                     | 105   | -:-                                       | 1     |  |  |  |  |  |  |  |
| chr2 | 44545112       | 44545112     | SNV          | T                             | G:G                                       | 1     | G:T                                       | 68    |  |  |  |  |  |  |  |
| chr2 | 44545220       | 44545220     | SNV          | A                             | A:C                                       | 1     |                                           | 0     |  |  |  |  |  |  |  |
| chr2 | 44545234       | 44545234     | SNV          | G                             | T:T                                       | 24    | G:T                                       | 216   |  |  |  |  |  |  |  |
| chr2 | 44545235       | 44545235     | deletion     | T                             | -:-                                       | 56    | -:T                                       | 1624  |  |  |  |  |  |  |  |
| chr2 | 44545298       | 44545298     | SNV          | C                             | T:T                                       | 16    | C:T                                       | 217   |  |  |  |  |  |  |  |
| chr2 | 44545379       | 44545379     | SNV          | G                             | A:G                                       | 4     |                                           | 0     |  |  |  |  |  |  |  |
| chr2 | 44545391       | 44545391     | SNV          | G                             | A:G                                       | 47    |                                           | 0     |  |  |  |  |  |  |  |
| chr2 | 44545451       | 44545451     | SNV          | G                             | C:G                                       | 33    |                                           | 0     |  |  |  |  |  |  |  |
| chr2 | 44545483       | 44545483     | deletion     | G                             | -:G                                       | 21    |                                           | 0     |  |  |  |  |  |  |  |
| chr2 | 44545484       | 44545484     | SNV          | C                             | A:C                                       | 21    |                                           | 0     |  |  |  |  |  |  |  |
| chr2 | 44545506       | 44545506     | SNV          | G                             | C:G                                       | 1     |                                           | 0     |  |  |  |  |  |  |  |
| chr2 | 44545545       | 44545545     | SNV          | T                             | G:T                                       | 87    | G:G                                       | 6     |  |  |  |  |  |  |  |
| chr2 | 44545576       | 44545576     | SNV          | T                             | C:C                                       | 899   | C:T                                       | 1150  |  |  |  |  |  |  |  |
| chr2 | 44545705       | 44545705     | SNV          | C                             | C:G                                       | 63    | G:G                                       | 1     |  |  |  |  |  |  |  |
| chr2 | 44545712       | 44545712     | SNV          | T                             | G:T                                       | 23    | G:G                                       | 1     |  |  |  |  |  |  |  |
| chr2 | 44545737       | 44545737     | insertion    | -                             | TGTT:TGTT                                 | 1233  | -:TGTT                                    | 908   |  |  |  |  |  |  |  |
| chr2 | 44545740       | 44545740     | SNV          | A                             | C:C                                       | 1233  | A:C                                       | 908   |  |  |  |  |  |  |  |
| chr2 | 44545741       | 44545741     | SNV          | A                             | T:T                                       | 1159  | A:T                                       | 824   |  |  |  |  |  |  |  |
| chr2 | 44545743       | 44545743     | insertion    | -                             | A:A                                       | 1233  | -:A                                       | 908   |  |  |  |  |  |  |  |
| chr2 | 44545745       | 44545745     | SNV          | A                             | G:G                                       | 1233  | A:G                                       | 908   |  |  |  |  |  |  |  |
| chr2 | 44545746       | 44545746     | SNV          | T                             | C:C                                       | 1233  | C:T                                       | 908   |  |  |  |  |  |  |  |
| chr2 | 44545750       | 44545750     | SNV          | T                             | G:T                                       | 908   | G:G                                       | 1233  |  |  |  |  |  |  |  |
| chr2 | 44545752       | 44545752     | SNV          | C                             | A:C                                       | 908   | A:A                                       | 1233  |  |  |  |  |  |  |  |
| chr2 | 44545753       | 44545753     | SNV          | T                             | A:A                                       | 1151  | A:T                                       | 831   |  |  |  |  |  |  |  |
| chr2 | 44545755       | 44545758     | deletion     | TGCC                          | -:-                                       | 1233  | -:TGCC                                    | 908   |  |  |  |  |  |  |  |
| chr2 | 44545762       | 44545762     | SNV          | G                             | C:G                                       | 910   | C:C                                       | 1231  |  |  |  |  |  |  |  |
| chr2 | 44545763       | 44545763     | SNV          | C                             | A:C                                       | 910   | A:A                                       | 1231  |  |  |  |  |  |  |  |
| chr2 | 44545764       | 44545764     | SNV          | A                             | T:T                                       | 1230  | A:T                                       | 909   |  |  |  |  |  |  |  |
| chr2 | 44545765       | 44545765     | SNV          | A                             | T:T                                       | 1230  | A:T                                       | 909   |  |  |  |  |  |  |  |
| chr2 | 44545766       | 44545766     | SNV          | A                             | T:T                                       | 1230  | A:T                                       | 909   |  |  |  |  |  |  |  |
| chr2 | 44545776       | 44545776     | SNV          | C                             | A:A                                       | 1     | A:C                                       | 67    |  |  |  |  |  |  |  |
| chr2 | 44545936       | 44545936     | SNV          | T                             | C:T                                       | 1     |                                           | 0     |  |  |  |  |  |  |  |
| chr2 | 44546016       | 44546016     | SNV          | C                             | T:T                                       | 1243  | C:T                                       | 892   |  |  |  |  |  |  |  |
| chr2 | 44546176       | 44546177     | deletion     | AT                            | -:AT                                      | 34    |                                           | 0     |  |  |  |  |  |  |  |
| chr2 | 44546177       | 44546177     | SNV          | T                             | C:T                                       | 2     |                                           | 0     |  |  |  |  |  |  |  |
| chr2 | 44546369       | 44546369     | SNV          | C                             | C:G                                       | 14    |                                           | 0     |  |  |  |  |  |  |  |
| chr2 | 44546403       | 44546403     | SNV          | T                             | A:T                                       | 32    |                                           | 0     |  |  |  |  |  |  |  |
| chr2 | 44546567       | 44546567     | SNV          | T                             | C:T                                       | 3     |                                           | 0     |  |  |  |  |  |  |  |
| chr2 | 44546601       | 44546601     | SNV          | C                             | A:A                                       | 1     | A:C                                       | 45    |  |  |  |  |  |  |  |
| chr2 | 44546633       | 44546636     | deletion     | ATTT                          | -:-                                       | 8     | -:ATTT                                    | 233   |  |  |  |  |  |  |  |
| chr2 | 44546661       | 44546661     | SNV          | T                             | C:T                                       | 7     |                                           | 0     |  |  |  |  |  |  |  |
| chr2 | 44546741       | 44546741     | SNV          | T                             | C:C                                       | 640   | C:T                                       | 1056  |  |  |  |  |  |  |  |
| chr2 | 44547009       | 44547009     | SNV          | T                             | C:T                                       | 5     |                                           | 0     |  |  |  |  |  |  |  |
| chr2 | 44547131       | 44547131     | SNV          | A                             | G:G                                       | 920   | A:G                                       | 1138  |  |  |  |  |  |  |  |
| chr2 | 44547142       | 44547142     | SNV          | A                             | G:G                                       | 17    | A:G                                       | 218   |  |  |  |  |  |  |  |
| chr2 | 44547236       | 44547236     | SNV          | G                             | C:C                                       | 22    | C:G                                       | 209   |  |  |  |  |  |  |  |
| chr2 | 44547353       | 44547353     | SNV          | C P                           | C:T P:S                                   | 1     |                                           | 0     |  |  |  |  |  |  |  |
| chr2 | 44547574       | 44547574     | SNV          | G M                           | A:G I:M                                   | 1048  | A:A I:I                                   | 630   |  |  |  |  |  |  |  |
| chr2 | 44547821       | 44547821     | SNV          | T                             | A:T                                       | 3     |                                           | 0     |  |  |  |  |  |  |  |
| chr2 | 44547822       | 44547822     | SNV          | T                             | C:T                                       | 3     |                                           | 0     |  |  |  |  |  |  |  |
| chr2 | 44547899       | 44547899     | SNV          | T                             | C:T                                       | 3     |                                           | 0     |  |  |  |  |  |  |  |
| chr2 | 44547909       | 44547909     | SNV          | T                             | C:T                                       | 1166  | C:C                                       | 858   |  |  |  |  |  |  |  |
| chr2 | 44526955       | 44526955     | SNV          | T                             | C:T                                       | 9     |                                           | 0     |  |  |  |  |  |  |  |
| chr2 | 44508472       | 44508472     | SNV          | A                             | A:G                                       | 1     |                                           | 0     |  |  |  |  |  |  |  |
| chr2 | 44511654       | 44511654     | SNV          | C                             | C:T                                       | 2     |                                           | 0     |  |  |  |  |  |  |  |
| chr2 | 44546206       | 44546206     | SNV          | G                             | A:G                                       | 2     |                                           | 0     |  |  |  |  |  |  |  |
| chr2 | 44509571       | 44509571     | SNV          | G                             | A:G                                       | 27    |                                           | 0     |  |  |  |  |  |  |  |

Supplementary Table 1. Variants of SLC3A1 in the 1KG database

| Chr  | Start Position | End Position | Variant type | Ref Genotype   Ref Proteotype | Variant Genotype 1   Variant Proteotype 1 | Count | Variant Genotype 2   Variant Proteotype 2 | Count |  |  |  |  |  |  |  |
|------|----------------|--------------|--------------|-------------------------------|-------------------------------------------|-------|-------------------------------------------|-------|--|--|--|--|--|--|--|
| chr2 | 44527402       | 44527402     | SNV          | G                             | C:G                                       | 6     |                                           | 0     |  |  |  |  |  |  |  |
| chr2 | 44517721       | 44517721     | SNV          | C                             | C:T                                       | 8     |                                           | 0     |  |  |  |  |  |  |  |
| chr2 | 44503323       | 44503323     | deletion     | G                             | -:G                                       | 4     |                                           | 0     |  |  |  |  |  |  |  |
| chr2 | 44536288       | 44536288     | SNV          | A                             | A:G                                       | 1     |                                           | 0     |  |  |  |  |  |  |  |
| chr2 | 44533738       | 44533738     | SNV          | G                             | A:G                                       | 1     |                                           | 0     |  |  |  |  |  |  |  |
| chr2 | 44515372       | 44515372     | SNV          | C                             | C:T                                       | 2     |                                           | 0     |  |  |  |  |  |  |  |
| chr2 | 44508707       | 44508707     | SNV          | A                             | A:G                                       | 2     |                                           | 0     |  |  |  |  |  |  |  |
| chr2 | 44513953       | 44513953     | SNV          | C                             | C:T                                       | 3     |                                           | 0     |  |  |  |  |  |  |  |
| chr2 | 44533181       | 44533181     | SNV          | C                             | C:T                                       | 1     |                                           | 0     |  |  |  |  |  |  |  |
| chr2 | 44530924       | 44530924     | SNV          | G                             | A:G                                       | 3     |                                           | 0     |  |  |  |  |  |  |  |
| chr2 | 44527452       | 44527452     | SNV          | C                             | C:T                                       | 4     |                                           | 0     |  |  |  |  |  |  |  |
| chr2 | 44530190       | 44530190     | SNV          | A                             | A:T                                       | 1     |                                           | 0     |  |  |  |  |  |  |  |
| chr2 | 44547095       | 44547095     | SNV          | A                             | A:G                                       | 1     |                                           | 0     |  |  |  |  |  |  |  |
| chr2 | 44504817       | 44504817     | SNV          | C                             | C:T                                       | 1     |                                           | 0     |  |  |  |  |  |  |  |
| chr2 | 44539829       | 44539829     | SNV          | C Y                           | C:T Y:Y                                   | 1     |                                           | 0     |  |  |  |  |  |  |  |
| chr2 | 44515978       | 44515978     | SNV          | T                             | A:T                                       | 1     |                                           | 0     |  |  |  |  |  |  |  |
| chr2 | 44540832       | 44540832     | SNV          | G                             | G:T                                       | 1     |                                           | 0     |  |  |  |  |  |  |  |
| chr2 | 44524203       | 44524203     | SNV          | C                             | C:G                                       | 1     |                                           | 0     |  |  |  |  |  |  |  |
| chr2 | 44540737       | 44540737     | SNV          | T                             | C:T                                       | 4     |                                           | 0     |  |  |  |  |  |  |  |
| chr2 | 44532243       | 44532243     | SNV          | G                             | A:G                                       | 2     |                                           | 0     |  |  |  |  |  |  |  |
| chr2 | 44536150       | 44536150     | SNV          | C                             | C:T                                       | 12    |                                           | 0     |  |  |  |  |  |  |  |
| chr2 | 44520679       | 44520679     | SNV          | A                             | A:T                                       | 1     |                                           | 0     |  |  |  |  |  |  |  |
| chr2 | 44512100       | 44512100     | SNV          | C                             | C:G                                       | 1     |                                           | 0     |  |  |  |  |  |  |  |
| chr2 | 44508265       | 44508274     | deletion     | TCCCCTCCCC                    | -:TCCCCTCCCC                              | 7     |                                           | 0     |  |  |  |  |  |  |  |
| chr2 | 44508966       | 44508971     | deletion     | TCCATG                        | -:                                        | 1     | -:TCCATG                                  | 62    |  |  |  |  |  |  |  |
| chr2 | 44544316       | 44544316     | SNV          | T                             | C:T                                       | 2     |                                           | 0     |  |  |  |  |  |  |  |
| chr2 | 44505869       | 44505869     | SNV          | T                             | C:T                                       | 1     |                                           | 0     |  |  |  |  |  |  |  |
| chr2 | 44523495       | 44523495     | SNV          | G                             | A:G                                       | 3     |                                           | 0     |  |  |  |  |  |  |  |
| chr2 | 44545266       | 44545266     | SNV          | G                             | A:G                                       | 1     |                                           | 0     |  |  |  |  |  |  |  |
| chr2 | 44520876       | 44520876     | SNV          | A                             | A:G                                       | 1     |                                           | 0     |  |  |  |  |  |  |  |
| chr2 | 44527392       | 44527392     | SNV          | A                             | A:G                                       | 1     |                                           | 0     |  |  |  |  |  |  |  |
| chr2 | 44524090       | 44524090     | SNV          | G                             | A:G                                       | 12    |                                           | 0     |  |  |  |  |  |  |  |
| chr2 | 44513722       | 44513722     | SNV          | G                             | A:G                                       | 3     |                                           | 0     |  |  |  |  |  |  |  |
| chr2 | 44530956       | 44530956     | SNV          | G                             | A:G                                       | 2     |                                           | 0     |  |  |  |  |  |  |  |
| chr2 | 44524409       | 44524409     | SNV          | C                             | C:G                                       | 6     |                                           | 0     |  |  |  |  |  |  |  |
| chr2 | 44545528       | 44545528     | SNV          | C                             | A:C                                       | 1     |                                           | 0     |  |  |  |  |  |  |  |
| chr2 | 44504008       | 44504008     | SNV          | G                             | A:G                                       | 2     |                                           | 0     |  |  |  |  |  |  |  |
| chr2 | 44526381       | 44526381     | SNV          | T                             | C:T                                       | 1     |                                           | 0     |  |  |  |  |  |  |  |
| chr2 | 44515564       | 44515564     | SNV          | C                             | A:C                                       | 6     |                                           | 0     |  |  |  |  |  |  |  |
| chr2 | 44529858       | 44529858     | SNV          | C                             | C:G                                       | 1     |                                           | 0     |  |  |  |  |  |  |  |
| chr2 | 44538644       | 44538644     | insertion    | -                             | -:A                                       | 8     |                                           | 0     |  |  |  |  |  |  |  |
| chr2 | 44505903       | 44505903     | SNV          | G                             | A:G                                       | 13    |                                           | 0     |  |  |  |  |  |  |  |
| chr2 | 44512995       | 44512995     | SNV          | T                             | C:T                                       | 6     |                                           | 0     |  |  |  |  |  |  |  |
| chr2 | 44538007       | 44538007     | SNV          | G                             | A:G                                       | 2     |                                           | 0     |  |  |  |  |  |  |  |
| chr2 | 44511129       | 44511129     | SNV          | G                             | A:G                                       | 1     |                                           | 0     |  |  |  |  |  |  |  |
| chr2 | 44542714       | 44542714     | SNV          | G                             | A:A                                       | 1     | A:G                                       | 1     |  |  |  |  |  |  |  |
| chr2 | 44524308       | 44524308     | SNV          | C                             | C:T                                       | 7     |                                           | 0     |  |  |  |  |  |  |  |
| chr2 | 44509489       | 44509489     | SNV          | A                             | A:T                                       | 1     |                                           | 0     |  |  |  |  |  |  |  |
| chr2 | 44512288       | 44512288     | SNV          | C                             | C:T                                       | 1     |                                           | 0     |  |  |  |  |  |  |  |
| chr2 | 44502905       | 44502905     | SNV          | T S                           | A:T S:S                                   | 3     |                                           | 0     |  |  |  |  |  |  |  |
| chr2 | 44536689       | 44536689     | SNV          | A                             | A:T                                       | 1     |                                           | 0     |  |  |  |  |  |  |  |
| chr2 | 44535110       | 44535110     | SNV          | G                             | C:G                                       | 1     |                                           | 0     |  |  |  |  |  |  |  |
| chr2 | 44524981       | 44524981     | SNV          | C                             | C:G                                       | 8     |                                           | 0     |  |  |  |  |  |  |  |
| chr2 | 44508463       | 44508463     | SNV          | G                             | A:G                                       | 4     |                                           | 0     |  |  |  |  |  |  |  |
| chr2 | 44542939       | 44542939     | SNV          | T                             | C:T                                       | 1     |                                           | 0     |  |  |  |  |  |  |  |
| chr2 | 44544041       | 44544041     | SNV          | T                             | C:T                                       | 2     |                                           | 0     |  |  |  |  |  |  |  |
| chr2 | 44525315       | 44525315     | SNV          | C                             | C:T                                       | 2     |                                           | 0     |  |  |  |  |  |  |  |
| chr2 | 44522753       | 44522753     | SNV          | C                             | C:T                                       | 6     |                                           | 0     |  |  |  |  |  |  |  |
| chr2 | 44506946       | 44506946     | SNV          | C                             | A:C                                       | 1     |                                           | 0     |  |  |  |  |  |  |  |
| chr2 | 44533595       | 44533595     | SNV          | C                             | C:G                                       | 7     |                                           | 0     |  |  |  |  |  |  |  |
| chr2 | 44544067       | 44544067     | SNV          | A                             | A:C                                       | 2     |                                           | 0     |  |  |  |  |  |  |  |
| chr2 | 44530201       | 44530201     | SNV          | G                             | A:G                                       | 2     |                                           | 0     |  |  |  |  |  |  |  |
| chr2 | 44503721       | 44503721     | SNV          | C                             | C:G                                       | 1     |                                           | 0     |  |  |  |  |  |  |  |
| chr2 | 44519313       | 44519313     | SNV          | C                             | C:G                                       | 13    |                                           | 0     |  |  |  |  |  |  |  |
| chr2 | 44542995       | 44542995     | SNV          | C                             | C:T                                       | 1     |                                           | 0     |  |  |  |  |  |  |  |
| chr2 | 44519944       | 44519944     | SNV          | G                             | A:G                                       | 5     |                                           | 0     |  |  |  |  |  |  |  |
| chr2 | 44544273       | 44544273     | SNV          | T                             | C:T                                       | 1     |                                           | 0     |  |  |  |  |  |  |  |
| chr2 | 44534104       | 44534104     | SNV          | A                             | A:G                                       | 14    |                                           | 0     |  |  |  |  |  |  |  |
| chr2 | 44521437       | 44521437     | SNV          | A                             | A:T                                       | 1     |                                           | 0     |  |  |  |  |  |  |  |
| chr2 | 44525022       | 44525022     | SNV          | C                             | A:C                                       | 2     |                                           | 0     |  |  |  |  |  |  |  |
| chr2 | 44526328       | 44526328     | SNV          | C                             | C:G                                       | 2     |                                           | 0     |  |  |  |  |  |  |  |
| chr2 | 44513328       | 44513328     | SNV          | T                             | C:T                                       | 1     |                                           | 0     |  |  |  |  |  |  |  |
| chr2 | 44507705       | 44507705     | SNV          | C                             | C:T                                       | 1     |                                           | 0     |  |  |  |  |  |  |  |
| chr2 | 44541205       | 44541205     | SNV          | T                             | C:T                                       | 1     |                                           | 0     |  |  |  |  |  |  |  |
| chr2 | 44529568       | 44529568     | SNV          | T                             | C:T                                       | 2     |                                           | 0     |  |  |  |  |  |  |  |
| chr2 | 44513366       | 44513366     | SNV          | T                             | C:T                                       | 1     |                                           | 0     |  |  |  |  |  |  |  |
| chr2 | 44534606       | 44534606     | SNV          | C                             | C:G                                       | 1     |                                           | 0     |  |  |  |  |  |  |  |
| chr2 | 44537458       | 44537458     | SNV          | T                             | C:T                                       | 1     |                                           | 0     |  |  |  |  |  |  |  |
| chr2 | 44514746       | 44514746     | SNV          | T                             | C:T                                       | 2     |                                           | 0     |  |  |  |  |  |  |  |
| chr2 | 44537363       | 44537363     | SNV          | G                             | G:T                                       | 2     |                                           | 0     |  |  |  |  |  |  |  |
| chr2 | 44527090       | 44527090     | deletion     | T                             | -:T                                       | 3     |                                           | 0     |  |  |  |  |  |  |  |
| chr2 | 44545114       | 44545114     | SNV          | G                             | A:G                                       | 1     |                                           | 0     |  |  |  |  |  |  |  |
| chr2 | 44542648       | 44542648     | SNV          | A                             | A:G                                       | 9     | G:G                                       | 1     |  |  |  |  |  |  |  |
| chr2 | 44516960       | 44516960     | SNV          | G                             | A:G                                       | 1     |                                           | 0     |  |  |  |  |  |  |  |
| chr2 | 44506014       | 44506014     | SNV          | C                             | A:C                                       | 1     |                                           | 0     |  |  |  |  |  |  |  |
| chr2 | 44523270       | 44523270     | SNV          | C                             | A:C                                       | 1     |                                           | 0     |  |  |  |  |  |  |  |
| chr2 | 44502974       | 44502974     | SNV          | C L                           | C:T L:L                                   | 8     |                                           | 0     |  |  |  |  |  |  |  |
| chr2 | 44538824       | 44538824     | SNV          | C                             | C:T                                       | 5     |                                           | 0     |  |  |  |  |  |  |  |
| chr2 | 44546476       | 44546476     | SNV          | T                             | C:T                                       | 4     |                                           | 0     |  |  |  |  |  |  |  |
| chr2 | 44531926       | 44531926     | SNV          | C                             | C:T                                       | 1     |                                           | 0     |  |  |  |  |  |  |  |
| chr2 | 44546123       | 44546123     | SNV          | G                             | C:G                                       | 1     |                                           | 0     |  |  |  |  |  |  |  |
| chr2 | 44535712       | 44535712     | SNV          | T                             | C:T                                       | 2     |                                           | 0     |  |  |  |  |  |  |  |
| chr2 | 44538973       | 44538973     | SNV          | T                             | C:T                                       | 2     |                                           | 0     |  |  |  |  |  |  |  |
| chr2 | 44524323       | 44524323     | SNV          | T                             | C:T                                       | 3     |                                           | 0     |  |  |  |  |  |  |  |

Supplementary Table 1. Variants of SLC3A1 in the 1KG database

| Chr  | Start Position | End Position | Variant type | Ref Genotype   Ref Proteotype | Variant Genotype 1   Variant Proteotype 1 | Count | Variant Genotype 2   Variant Proteotype 2 | Count |  |  |  |  |  |  |  |
|------|----------------|--------------|--------------|-------------------------------|-------------------------------------------|-------|-------------------------------------------|-------|--|--|--|--|--|--|--|
| chr2 | 44545626       | 44545626     | SNV          | T                             | C:T                                       | 10    |                                           | 0     |  |  |  |  |  |  |  |
| chr2 | 44539726       | 44539726     | SNV          | T I                           | C:T I                                     | 2     |                                           | 0     |  |  |  |  |  |  |  |
| chr2 | 44505535       | 44505535     | SNV          | T                             | G:T                                       | 8     |                                           | 0     |  |  |  |  |  |  |  |
| chr2 | 44518869       | 44518869     | SNV          | G                             | A:G                                       | 3     |                                           | 0     |  |  |  |  |  |  |  |
| chr2 | 44507044       | 44507044     | SNV          | G                             | C:G                                       | 2     |                                           | 0     |  |  |  |  |  |  |  |
| chr2 | 44541576       | 44541576     | SNV          | C                             | C:T                                       | 1     |                                           | 0     |  |  |  |  |  |  |  |
| chr2 | 44518670       | 44518670     | SNV          | T                             | G:T                                       | 1     |                                           | 0     |  |  |  |  |  |  |  |
| chr2 | 44522011       | 44522011     | insertion    | -                             | -:T                                       | 3     |                                           | 0     |  |  |  |  |  |  |  |
| chr2 | 44511436       | 44511436     | SNV          | C                             | A:C                                       | 1     |                                           | 0     |  |  |  |  |  |  |  |
| chr2 | 44527072       | 44527072     | SNV          | A                             | A:G                                       | 2     |                                           | 0     |  |  |  |  |  |  |  |
| chr2 | 44504400       | 44504400     | SNV          | T                             | C:T                                       | 1     |                                           | 0     |  |  |  |  |  |  |  |
| chr2 | 44537295       | 44537295     | SNV          | G                             | A:G                                       | 9     |                                           | 0     |  |  |  |  |  |  |  |
| chr2 | 44547261       | 44547261     | deletion     | C                             | -:C                                       | 5     |                                           | 0     |  |  |  |  |  |  |  |
| chr2 | 44522426       | 44522426     | SNV          | C                             | C:T                                       | 1     |                                           | 0     |  |  |  |  |  |  |  |
| chr2 | 44508595       | 44508595     | SNV          | G R                           | A:G Q:R                                   | 1     |                                           | 0     |  |  |  |  |  |  |  |
| chr2 | 44532734       | 44532734     | deletion     | T                             | -:T                                       | 3     |                                           | 0     |  |  |  |  |  |  |  |
| chr2 | 44510808       | 44510808     | SNV          | T                             | C:T                                       | 5     |                                           | 0     |  |  |  |  |  |  |  |
| chr2 | 44538615       | 44538615     | SNV          | C                             | A:C                                       | 1     |                                           | 0     |  |  |  |  |  |  |  |
| chr2 | 44516000       | 44516000     | SNV          | G                             | G:T                                       | 7     |                                           | 0     |  |  |  |  |  |  |  |
| chr2 | 44541430       | 44541430     | insertion    | -                             | -:AGA                                     | 33    | AGA:AGA                                   | 1     |  |  |  |  |  |  |  |
| chr2 | 44542639       | 44542639     | SNV          | C                             | C:T                                       | 14    |                                           | 0     |  |  |  |  |  |  |  |
| chr2 | 44507566       | 44507566     | SNV          | C                             | C:T                                       | 9     |                                           | 0     |  |  |  |  |  |  |  |
| chr2 | 44517254       | 44517254     | SNV          | C                             | C:T                                       | 19    |                                           | 0     |  |  |  |  |  |  |  |
| chr2 | 44526412       | 44526412     | SNV          | A                             | A:T                                       | 10    |                                           | 0     |  |  |  |  |  |  |  |
| chr2 | 44508490       | 44508490     | SNV          | C                             | A:C                                       | 1     |                                           | 0     |  |  |  |  |  |  |  |
| chr2 | 44537091       | 44537091     | SNV          | T                             | A:T                                       | 2     |                                           | 0     |  |  |  |  |  |  |  |
| chr2 | 44514210       | 44514210     | SNV          | T                             | C:T                                       | 8     |                                           | 0     |  |  |  |  |  |  |  |
| chr2 | 44546068       | 44546072     | deletion     | TCTGC                         | -:TCTGC                                   | 3     |                                           | 0     |  |  |  |  |  |  |  |
| chr2 | 44531449       | 44531449     | SNV          | T M                           | G:T R:M                                   | 1     |                                           | 0     |  |  |  |  |  |  |  |
| chr2 | 44530728       | 44530730     | deletion     | TTA                           | -:TTA                                     | 11    |                                           | 0     |  |  |  |  |  |  |  |
| chr2 | 44532870       | 44532870     | SNV          | T                             | G:T                                       | 1     |                                           | 0     |  |  |  |  |  |  |  |
| chr2 | 44503780       | 44503780     | SNV          | G                             | C:G                                       | 2     |                                           | 0     |  |  |  |  |  |  |  |
| chr2 | 44515261       | 44515261     | SNV          | G                             | C:G                                       | 5     |                                           | 0     |  |  |  |  |  |  |  |
| chr2 | 44516237       | 44516237     | SNV          | G                             | A:G                                       | 1     |                                           | 0     |  |  |  |  |  |  |  |
| chr2 | 44527226       | 44527226     | SNV          | C I                           | A:C I                                     | 1     |                                           | 0     |  |  |  |  |  |  |  |
| chr2 | 44518578       | 44518578     | SNV          | T                             | C:T                                       | 8     |                                           | 0     |  |  |  |  |  |  |  |
| chr2 | 44514520       | 44514520     | SNV          | A                             | A:G                                       | 1     |                                           | 0     |  |  |  |  |  |  |  |
| chr2 | 44525939       | 44525939     | SNV          | C                             | C:T                                       | 1     |                                           | 0     |  |  |  |  |  |  |  |
| chr2 | 44538245       | 44538245     | SNV          | T                             | C:T                                       | 1     |                                           | 0     |  |  |  |  |  |  |  |
| chr2 | 44516334       | 44516339     | deletion     | TTCTTT                        | -:TTCTTT                                  | 9     |                                           | 0     |  |  |  |  |  |  |  |
| chr2 | 44532012       | 44532012     | SNV          | G                             | C:G                                       | 1     |                                           | 0     |  |  |  |  |  |  |  |
| chr2 | 44540432       | 44540432     | SNV          | C                             | C:T                                       | 8     |                                           | 0     |  |  |  |  |  |  |  |
| chr2 | 44526905       | 44526905     | SNV          | G                             | C:G                                       | 2     |                                           | 0     |  |  |  |  |  |  |  |
| chr2 | 44504687       | 44504687     | SNV          | C                             | C:G                                       | 1     |                                           | 0     |  |  |  |  |  |  |  |
| chr2 | 44529813       | 44529813     | SNV          | A                             | A:G                                       | 6     |                                           | 0     |  |  |  |  |  |  |  |
| chr2 | 44527672       | 44527672     | SNV          | C                             | C:G                                       | 4     | G:G                                       | 1     |  |  |  |  |  |  |  |
| chr2 | 44509196       | 44509196     | SNV          | A                             | A:C                                       | 2     |                                           | 0     |  |  |  |  |  |  |  |
| chr2 | 44505408       | 44505408     | SNV          | C                             | A:C                                       | 1     |                                           | 0     |  |  |  |  |  |  |  |
| chr2 | 44506749       | 44506749     | SNV          | T                             | G:T                                       | 37    | G:G                                       | 1     |  |  |  |  |  |  |  |
| chr2 | 44511463       | 44511463     | SNV          | C                             | C:T                                       | 2     |                                           | 0     |  |  |  |  |  |  |  |
| chr2 | 44526895       | 44526895     | SNV          | A                             | A:T                                       | 9     |                                           | 0     |  |  |  |  |  |  |  |
| chr2 | 44529758       | 44529758     | SNV          | T                             | C:T                                       | 10    |                                           | 0     |  |  |  |  |  |  |  |
| chr2 | 44546343       | 44546343     | SNV          | A                             | A:G                                       | 1     |                                           | 0     |  |  |  |  |  |  |  |
| chr2 | 44537166       | 44537166     | SNV          | G                             | C:G                                       | 2     |                                           | 0     |  |  |  |  |  |  |  |
| chr2 | 44510060       | 44510060     | SNV          | G                             | C:G                                       | 1     |                                           | 0     |  |  |  |  |  |  |  |
| chr2 | 44526493       | 44526493     | SNV          | T                             | C:T                                       | 1     |                                           | 0     |  |  |  |  |  |  |  |
| chr2 | 44535316       | 44535316     | SNV          | T                             | A:T                                       | 6     |                                           | 0     |  |  |  |  |  |  |  |
| chr2 | 44512977       | 44512977     | SNV          | A                             | A:T                                       | 1     |                                           | 0     |  |  |  |  |  |  |  |
| chr2 | 44515987       | 44515987     | SNV          | T                             | A:T                                       | 1     |                                           | 0     |  |  |  |  |  |  |  |
| chr2 | 44512934       | 44512934     | SNV          | T                             | C:T                                       | 1     |                                           | 0     |  |  |  |  |  |  |  |
| chr2 | 44522619       | 44522619     | SNV          | C                             | C:T                                       | 1     |                                           | 0     |  |  |  |  |  |  |  |
| chr2 | 44508972       | 44508972     | SNV          | T                             | A:T                                       | 1     |                                           | 0     |  |  |  |  |  |  |  |
| chr2 | 44514701       | 44514701     | SNV          | G                             | G:T                                       | 6     | T:T                                       | 1     |  |  |  |  |  |  |  |
| chr2 | 44511471       | 44511471     | SNV          | C                             | C:T                                       | 1     |                                           | 0     |  |  |  |  |  |  |  |
| chr2 | 44522400       | 44522400     | SNV          | G                             | A:G                                       | 8     |                                           | 0     |  |  |  |  |  |  |  |
| chr2 | 44510176       | 44510176     | SNV          | C                             | C:T                                       | 1     |                                           | 0     |  |  |  |  |  |  |  |
| chr2 | 44546421       | 44546421     | SNV          | T                             | G:T                                       | 1     |                                           | 0     |  |  |  |  |  |  |  |
| chr2 | 44535607       | 44535607     | SNV          | A                             | A:T                                       | 1     |                                           | 0     |  |  |  |  |  |  |  |
| chr2 | 44546619       | 44546619     | SNV          | T                             | C:T                                       | 1     |                                           | 0     |  |  |  |  |  |  |  |
| chr2 | 44523707       | 44523707     | SNV          | G                             | A:G                                       | 1     |                                           | 0     |  |  |  |  |  |  |  |
| chr2 | 44538858       | 44538858     | SNV          | A                             | A:G                                       | 1     |                                           | 0     |  |  |  |  |  |  |  |
| chr2 | 44525308       | 44525308     | SNV          | C                             | C:T                                       | 2     |                                           | 0     |  |  |  |  |  |  |  |
| chr2 | 44540480       | 44540480     | SNV          | A                             | A:T                                       | 5     |                                           | 0     |  |  |  |  |  |  |  |
| chr2 | 44526437       | 44526437     | SNV          | C                             | C:T                                       | 1     |                                           | 0     |  |  |  |  |  |  |  |
| chr2 | 44509807       | 44509807     | SNV          | C                             | C:G                                       | 1     |                                           | 0     |  |  |  |  |  |  |  |
| chr2 | 44539142       | 44539142     | SNV          | A                             | A:C                                       | 1     |                                           | 0     |  |  |  |  |  |  |  |
| chr2 | 44532467       | 44532467     | SNV          | T                             | C:T                                       | 2     |                                           | 0     |  |  |  |  |  |  |  |
| chr2 | 44526987       | 44526987     | SNV          | G                             | A:G                                       | 1     |                                           | 0     |  |  |  |  |  |  |  |
| chr2 | 44508443       | 44508443     | SNV          | G                             | A:G                                       | 4     |                                           | 0     |  |  |  |  |  |  |  |
| chr2 | 44519389       | 44519389     | SNV          | C                             | C:G                                       | 4     |                                           | 0     |  |  |  |  |  |  |  |
| chr2 | 44513193       | 44513193     | SNV          | G S                           | C:G T:S                                   | 4     |                                           | 0     |  |  |  |  |  |  |  |
| chr2 | 44507891       | 44507891     | SNV          | A N                           | A:G N:S                                   | 1     |                                           | 0     |  |  |  |  |  |  |  |
| chr2 | 44504543       | 44504543     | SNV          | G                             | A:G                                       | 11    |                                           | 0     |  |  |  |  |  |  |  |
| chr2 | 44530508       | 44530508     | SNV          | G                             | A:G                                       | 2     |                                           | 0     |  |  |  |  |  |  |  |
| chr2 | 44538021       | 44538021     | SNV          | T                             | G:T                                       | 1     |                                           | 0     |  |  |  |  |  |  |  |
| chr2 | 44538616       | 44538616     | SNV          | G                             | A:G                                       | 5     |                                           | 0     |  |  |  |  |  |  |  |
| chr2 | 44514503       | 44514503     | SNV          | G                             | A:G                                       | 3     |                                           | 0     |  |  |  |  |  |  |  |
| chr2 | 44517541       | 44517541     | SNV          | A                             | A:G                                       | 1     |                                           | 0     |  |  |  |  |  |  |  |
| chr2 | 44532305       | 44532305     | SNV          | T                             | G:T                                       | 2     |                                           | 0     |  |  |  |  |  |  |  |
| chr2 | 44525516       | 44525516     | SNV          | C                             | C:T                                       | 3     |                                           | 0     |  |  |  |  |  |  |  |
| chr2 | 44505828       | 44505828     | SNV          | A                             | A:C                                       | 1     |                                           | 0     |  |  |  |  |  |  |  |
| chr2 | 44547566       | 44547566     | SNV          | G A                           | A:G T:A                                   | 3     |                                           | 0     |  |  |  |  |  |  |  |
| chr2 | 44504442       | 44504442     | SNV          | C                             | C:G                                       | 1     |                                           | 0     |  |  |  |  |  |  |  |
| chr2 | 44547233       | 44547233     | SNV          | T                             | C:T                                       | 2     |                                           | 0     |  |  |  |  |  |  |  |



Supplementary Table 1. Variants of SLC3A1 in the 1KG database

| Chr  | Start Position | End Position | Variant type | Ref Genotype   Ref Proteotype | Variant Genotype 1   Variant Proteotype 1 | Count | Variant Genotype 2   Variant Proteotype 2 | Count |  |  |  |  |  |  |
|------|----------------|--------------|--------------|-------------------------------|-------------------------------------------|-------|-------------------------------------------|-------|--|--|--|--|--|--|
| chr2 | 44542312       | 44542312     | SNV          | T                             | C:T                                       | 7     |                                           | 0     |  |  |  |  |  |  |
| chr2 | 44546773       | 44546773     | SNV          | T                             | A:T                                       | 13    |                                           | 0     |  |  |  |  |  |  |
| chr2 | 44508225       | 44508225     | SNV          | T                             | C:T                                       | 6     |                                           | 0     |  |  |  |  |  |  |
| chr2 | 44516632       | 44516632     | SNV          | G                             | A:G                                       | 2     |                                           | 0     |  |  |  |  |  |  |
| chr2 | 44529086       | 44529086     | SNV          | C                             | C:T                                       | 2     |                                           | 0     |  |  |  |  |  |  |
| chr2 | 44536522       | 44536522     | SNV          | T                             | C:T                                       | 1     |                                           | 0     |  |  |  |  |  |  |
| chr2 | 44544212       | 44544212     | SNV          | G                             | C:G                                       | 9     |                                           | 0     |  |  |  |  |  |  |
| chr2 | 44541148       | 44541148     | SNV          | G                             | C:G                                       | 9     |                                           | 0     |  |  |  |  |  |  |
| chr2 | 44533323       | 44533323     | SNV          | C                             | C:T                                       | 4     |                                           | 0     |  |  |  |  |  |  |
| chr2 | 44540146       | 44540146     | SNV          | T                             | C:T                                       | 2     |                                           | 0     |  |  |  |  |  |  |
| chr2 | 44546290       | 44546290     | SNV          | C                             | A:C                                       | 1     |                                           | 0     |  |  |  |  |  |  |
| chr2 | 44525469       | 44525470     | deletion     | CT                            | -.CT                                      | 3     |                                           | 0     |  |  |  |  |  |  |
| chr2 | 44533859       | 44533859     | insertion    | -                             | -.T                                       | 14    |                                           | 0     |  |  |  |  |  |  |
| chr2 | 44542113       | 44542113     | SNV          | C                             | C:T                                       | 6     |                                           | 0     |  |  |  |  |  |  |
| chr2 | 44519531       | 44519531     | SNV          | C                             | C:T                                       | 1     |                                           | 0     |  |  |  |  |  |  |
| chr2 | 44539643       | 44539643     | SNV          | G                             | A:G                                       | 2     |                                           | 0     |  |  |  |  |  |  |
| chr2 | 44512882       | 44512882     | SNV          | T                             | C:T                                       | 7     |                                           | 0     |  |  |  |  |  |  |
| chr2 | 44503779       | 44503779     | SNV          | C                             | C:T                                       | 1     |                                           | 0     |  |  |  |  |  |  |
| chr2 | 44541471       | 44541471     | insertion    | -                             | ATCA:ATCA                                 | 2     | --:ATCA                                   | 45    |  |  |  |  |  |  |
| chr2 | 44525237       | 44525237     | SNV          | G                             | A:G                                       | 2     |                                           | 0     |  |  |  |  |  |  |
| chr2 | 44531274       | 44531274     | SNV          | T                             | C:T                                       | 1     |                                           | 0     |  |  |  |  |  |  |
| chr2 | 44530516       | 44530516     | SNV          | G                             | A:G                                       | 5     |                                           | 0     |  |  |  |  |  |  |
| chr2 | 44544771       | 44544771     | SNV          | G                             | A:G                                       | 1     |                                           | 0     |  |  |  |  |  |  |
| chr2 | 44517114       | 44517114     | SNV          | G                             | A:G                                       | 7     |                                           | 0     |  |  |  |  |  |  |
| chr2 | 44522372       | 44522372     | SNV          | G                             | A:G                                       | 2     |                                           | 0     |  |  |  |  |  |  |
| chr2 | 44524795       | 44524795     | SNV          | A                             | A:G                                       | 1     |                                           | 0     |  |  |  |  |  |  |
| chr2 | 44522171       | 44522171     | SNV          | C                             | C:G                                       | 8     |                                           | 0     |  |  |  |  |  |  |
| chr2 | 44520686       | 44520686     | SNV          | G                             | A:G                                       | 7     |                                           | 0     |  |  |  |  |  |  |
| chr2 | 44505184       | 44505184     | SNV          | T                             | A:T                                       | 1     |                                           | 0     |  |  |  |  |  |  |
| chr2 | 44540609       | 44540609     | SNV          | T                             | C:T                                       | 10    |                                           | 0     |  |  |  |  |  |  |
| chr2 | 44546390       | 44546390     | SNV          | G                             | C:G                                       | 5     |                                           | 0     |  |  |  |  |  |  |
| chr2 | 44539500       | 44539500     | SNV          | T                             | C:T                                       | 1     |                                           | 0     |  |  |  |  |  |  |
| chr2 | 44537411       | 44537411     | SNV          | T                             | A:T                                       | 1     |                                           | 0     |  |  |  |  |  |  |
| chr2 | 44514441       | 44514441     | SNV          | T                             | C:T                                       | 1     |                                           | 0     |  |  |  |  |  |  |
| chr2 | 44537869       | 44537869     | SNV          | C                             | A:C                                       | 3     |                                           | 0     |  |  |  |  |  |  |
| chr2 | 44517203       | 44517203     | SNV          | A                             | A:G                                       | 1     |                                           | 0     |  |  |  |  |  |  |
| chr2 | 44547162       | 44547163     | deletion     | TA                            | -.TA                                      | 3     |                                           | 0     |  |  |  |  |  |  |
| chr2 | 44527138       | 44527138     | SNV          | G G                           | G:T G:V                                   | 1     |                                           | 0     |  |  |  |  |  |  |
| chr2 | 44529820       | 44529820     | SNV          | G                             | A:G                                       | 1     |                                           | 0     |  |  |  |  |  |  |
| chr2 | 44527701       | 44527701     | SNV          | C                             | C:T                                       | 3     |                                           | 0     |  |  |  |  |  |  |
| chr2 | 44546793       | 44546793     | SNV          | C                             | C:T                                       | 2     |                                           | 0     |  |  |  |  |  |  |
| chr2 | 44504591       | 44504591     | SNV          | A                             | A:G                                       | 8     |                                           | 0     |  |  |  |  |  |  |
| chr2 | 44520483       | 44520483     | SNV          | C                             | C:T                                       | 1     |                                           | 0     |  |  |  |  |  |  |
| chr2 | 44543267       | 44543267     | SNV          | C                             | A:C                                       | 1     |                                           | 0     |  |  |  |  |  |  |
| chr2 | 44519344       | 44519344     | SNV          | A                             | A:C                                       | 16    |                                           | 0     |  |  |  |  |  |  |
| chr2 | 44502927       | 44502927     | SNV          | C P                           | C:T P:S                                   | 1     |                                           | 0     |  |  |  |  |  |  |
| chr2 | 44546523       | 44546523     | SNV          | A                             | A:C                                       | 1     |                                           | 0     |  |  |  |  |  |  |
| chr2 | 44513804       | 44513804     | SNV          | G                             | A:G                                       | 2     |                                           | 0     |  |  |  |  |  |  |
| chr2 | 44541580       | 44541580     | SNV          | G                             | A:G                                       | 1     |                                           | 0     |  |  |  |  |  |  |
| chr2 | 44507463       | 44507463     | SNV          | C                             | C:T                                       | 3     |                                           | 0     |  |  |  |  |  |  |
| chr2 | 44510898       | 44510898     | SNV          | G                             | A:G                                       | 3     |                                           | 0     |  |  |  |  |  |  |
| chr2 | 44505287       | 44505287     | SNV          | A                             | A:G                                       | 2     |                                           | 0     |  |  |  |  |  |  |
| chr2 | 44520583       | 44520583     | SNV          | G                             | A:G                                       | 4     |                                           | 0     |  |  |  |  |  |  |
| chr2 | 44523636       | 44523636     | SNV          | A                             | A:G                                       | 4     |                                           | 0     |  |  |  |  |  |  |
| chr2 | 44534904       | 44534904     | SNV          | C                             | A:C                                       | 1     |                                           | 0     |  |  |  |  |  |  |
| chr2 | 44535749       | 44535749     | SNV          | T                             | C:T                                       | 1     |                                           | 0     |  |  |  |  |  |  |
| chr2 | 44529840       | 44529840     | SNV          | A                             | A:G                                       | 8     |                                           | 0     |  |  |  |  |  |  |
| chr2 | 44546833       | 44546833     | SNV          | T                             | C:T                                       | 41    | C:C                                       | 1     |  |  |  |  |  |  |
| chr2 | 44506568       | 44506568     | SNV          | G                             | G:T                                       | 1     |                                           | 0     |  |  |  |  |  |  |
| chr2 | 44512664       | 44512664     | SNV          | A                             | A:G                                       | 8     |                                           | 0     |  |  |  |  |  |  |
| chr2 | 44535142       | 44535142     | SNV          | G                             | C:G                                       | 1     |                                           | 0     |  |  |  |  |  |  |
| chr2 | 44520072       | 44520072     | SNV          | G                             | A:G                                       | 1     |                                           | 0     |  |  |  |  |  |  |
| chr2 | 44537301       | 44537301     | SNV          | G                             | A:G                                       | 1     |                                           | 0     |  |  |  |  |  |  |
| chr2 | 44546757       | 44546757     | SNV          | T                             | C:T                                       | 1     |                                           | 0     |  |  |  |  |  |  |
| chr2 | 44516546       | 44516546     | SNV          | C                             | C:T                                       | 9     |                                           | 0     |  |  |  |  |  |  |
| chr2 | 44529011       | 44529011     | SNV          | C                             | C:T                                       | 7     |                                           | 0     |  |  |  |  |  |  |
| chr2 | 44529284       | 44529284     | SNV          | C                             | C:T                                       | 5     |                                           | 0     |  |  |  |  |  |  |
| chr2 | 44544039       | 44544039     | SNV          | G                             | G:T                                       | 2     |                                           | 0     |  |  |  |  |  |  |
| chr2 | 44532861       | 44532861     | SNV          | C                             | C:T                                       | 1     |                                           | 0     |  |  |  |  |  |  |
| chr2 | 44541280       | 44541280     | SNV          | A                             | A:G                                       | 4     |                                           | 0     |  |  |  |  |  |  |
| chr2 | 44533546       | 44533546     | SNV          | C                             | A:C                                       | 2     |                                           | 0     |  |  |  |  |  |  |
| chr2 | 44542836       | 44542836     | SNV          | C                             | C:T                                       | 2     |                                           | 0     |  |  |  |  |  |  |
| chr2 | 44524383       | 44524383     | SNV          | C                             | C:T                                       | 2     |                                           | 0     |  |  |  |  |  |  |
| chr2 | 44518634       | 44518634     | SNV          | C                             | C:G                                       | 2     |                                           | 0     |  |  |  |  |  |  |
| chr2 | 44546506       | 44546506     | SNV          | T                             | C:T                                       | 30    |                                           | 0     |  |  |  |  |  |  |
| chr2 | 44513129       | 44513129     | SNV          | A                             | A:G                                       | 4     |                                           | 0     |  |  |  |  |  |  |
| chr2 | 44530028       | 44530028     | SNV          | G                             | A:G                                       | 14    |                                           | 0     |  |  |  |  |  |  |
| chr2 | 44506305       | 44506305     | SNV          | T                             | A:T                                       | 1     |                                           | 0     |  |  |  |  |  |  |
| chr2 | 44526097       | 44526097     | insertion    | -                             | -.T                                       | 3     |                                           | 0     |  |  |  |  |  |  |
| chr2 | 44536141       | 44536141     | SNV          | G                             | G:T                                       | 1     |                                           | 0     |  |  |  |  |  |  |
| chr2 | 44542475       | 44542475     | SNV          | G                             | G:T                                       | 3     |                                           | 0     |  |  |  |  |  |  |
| chr2 | 44520604       | 44520604     | SNV          | C                             | C:T                                       | 1     |                                           | 0     |  |  |  |  |  |  |
| chr2 | 44522451       | 44522451     | SNV          | A                             | A:T                                       | 7     |                                           | 0     |  |  |  |  |  |  |
| chr2 | 44538320       | 44538320     | SNV          | G                             | A:G                                       | 1     |                                           | 0     |  |  |  |  |  |  |
| chr2 | 44542838       | 44542864     | deletion     | AAAACATACAGGAGAAAAACAGTCTA    | --:AAAACATACAGGAGAAAAACAGTCTA             | 4     |                                           | 0     |  |  |  |  |  |  |
| chr2 | 44505673       | 44505673     | SNV          | G                             | A:G                                       | 2     |                                           | 0     |  |  |  |  |  |  |
| chr2 | 44539792       | 44539792     | SNV          | T M                           | C:T M                                     | 2     |                                           | 0     |  |  |  |  |  |  |
| chr2 | 44514687       | 44514687     | SNV          | G                             | G:T                                       | 1     |                                           | 0     |  |  |  |  |  |  |
| chr2 | 44528937       | 44528937     | SNV          | T                             | C:T                                       | 9     |                                           | 0     |  |  |  |  |  |  |
| chr2 | 44546652       | 44546652     | SNV          | T                             | C:T                                       | 2     |                                           | 0     |  |  |  |  |  |  |
| chr2 | 44542174       | 44542174     | SNV          | G                             | A:G                                       | 1     |                                           | 0     |  |  |  |  |  |  |
| chr2 | 44528580       | 44528580     | SNV          | T                             | G:T                                       | 1     |                                           | 0     |  |  |  |  |  |  |
| chr2 | 44512718       | 44512718     | SNV          | T                             | G:T                                       | 1     |                                           | 0     |  |  |  |  |  |  |
| chr2 | 44518143       | 44518143     | SNV          | C                             | C:T                                       | 3     |                                           | 0     |  |  |  |  |  |  |

Supplementary Table 1. Variants of SLC3A1 in the 1KG database

| Chr  | Start Position | End Position | Variant type | Ref Genotype   Ref Proteotype | Variant Genotype 1   Variant Proteotype 1 | Count | Variant Genotype 2   Variant Proteotype 2 | Count |  |  |  |  |  |  |
|------|----------------|--------------|--------------|-------------------------------|-------------------------------------------|-------|-------------------------------------------|-------|--|--|--|--|--|--|
| chr2 | 44535994       | 44535994     | SNV          | C                             | C:T                                       | 1     |                                           | 0     |  |  |  |  |  |  |
| chr2 | 44529891       | 44529891     | SNV          | C                             | C:T                                       | 4     |                                           | 0     |  |  |  |  |  |  |
| chr2 | 44530260       | 44530260     | SNV          | C                             | C:G                                       | 1     |                                           | 0     |  |  |  |  |  |  |
| chr2 | 44539713       | 44539713     | SNV          | T                             | A:T                                       | 10    |                                           | 0     |  |  |  |  |  |  |
| chr2 | 44507885       | 44507885     | SNV          | C A                           | C:G A:G                                   | 1     |                                           | 0     |  |  |  |  |  |  |
| chr2 | 44531461       | 44531461     | SNV          | A K                           | A:T K:I                                   | 2     |                                           | 0     |  |  |  |  |  |  |
| chr2 | 44516768       | 44516768     | SNV          | A                             | G:G                                       | 3     | A:G                                       | 60    |  |  |  |  |  |  |
| chr2 | 44545727       | 44545727     | SNV          | A                             | A:G                                       | 11    |                                           | 0     |  |  |  |  |  |  |
| chr2 | 44507991       | 44507991     | SNV          | G T                           | A:G T:T                                   | 1     |                                           | 0     |  |  |  |  |  |  |
| chr2 | 44529424       | 44529424     | SNV          | A                             | A:G                                       | 22    |                                           | 0     |  |  |  |  |  |  |
| chr2 | 44529576       | 44529576     | SNV          | C                             | C:T                                       | 1     |                                           | 0     |  |  |  |  |  |  |
| chr2 | 44514659       | 44514659     | SNV          | A                             | A:C                                       | 1     |                                           | 0     |  |  |  |  |  |  |
| chr2 | 44530604       | 44530604     | SNV          | G                             | G:T                                       | 1     |                                           | 0     |  |  |  |  |  |  |
| chr2 | 44540185       | 44540185     | SNV          | A                             | A:C                                       | 1     |                                           | 0     |  |  |  |  |  |  |
| chr2 | 44512267       | 44512267     | SNV          | T                             | G:T                                       | 7     |                                           | 0     |  |  |  |  |  |  |
| chr2 | 44502601       | 44502601     | SNV          | C                             | C:G                                       | 1     |                                           | 0     |  |  |  |  |  |  |
| chr2 | 44525166       | 44525166     | SNV          | T                             | A:T                                       | 1     |                                           | 0     |  |  |  |  |  |  |
| chr2 | 44539097       | 44539097     | SNV          | G                             | A:G                                       | 1     |                                           | 0     |  |  |  |  |  |  |
| chr2 | 44523017       | 44523018     | deletion     | TT                            | -:TT                                      | 4     |                                           | 0     |  |  |  |  |  |  |
| chr2 | 44525323       | 44525323     | SNV          | C                             | G:G                                       | 2     | C:G                                       | 44    |  |  |  |  |  |  |
| chr2 | 44506648       | 44506648     | SNV          | C                             | C:G                                       | 3     |                                           | 0     |  |  |  |  |  |  |
| chr2 | 44542044       | 44542044     | SNV          | T                             | C:T                                       | 14    |                                           | 0     |  |  |  |  |  |  |
| chr2 | 44518800       | 44518800     | SNV          | G                             | G:T                                       | 1     |                                           | 0     |  |  |  |  |  |  |
| chr2 | 44530628       | 44530628     | SNV          | G                             | G:T                                       | 2     |                                           | 0     |  |  |  |  |  |  |
| chr2 | 44535483       | 44535483     | SNV          | T                             | A:T                                       | 1     |                                           | 0     |  |  |  |  |  |  |
| chr2 | 44507793       | 44507793     | insertion    | -                             | -:T                                       | 39    |                                           | 0     |  |  |  |  |  |  |
| chr2 | 44533059       | 44533059     | SNV          | A                             | A:G                                       | 2     |                                           | 0     |  |  |  |  |  |  |
| chr2 | 44519614       | 44519614     | SNV          | G                             | G:T                                       | 8     |                                           | 0     |  |  |  |  |  |  |
| chr2 | 44524053       | 44524053     | SNV          | C                             | C:T                                       | 1     |                                           | 0     |  |  |  |  |  |  |
| chr2 | 44541621       | 44541621     | SNV          | A                             | A:G                                       | 2     |                                           | 0     |  |  |  |  |  |  |
| chr2 | 44532866       | 44532866     | SNV          | C                             | A:C                                       | 1     |                                           | 0     |  |  |  |  |  |  |
| chr2 | 44539321       | 44539321     | SNV          | A                             | A:G                                       | 6     |                                           | 0     |  |  |  |  |  |  |
| chr2 | 44533043       | 44533043     | SNV          | C                             | C:G                                       | 1     |                                           | 0     |  |  |  |  |  |  |
| chr2 | 44531863       | 44531863     | SNV          | G                             | C:G                                       | 1     |                                           | 0     |  |  |  |  |  |  |
| chr2 | 44546145       | 44546145     | SNV          | C                             | C:T                                       | 1     |                                           | 0     |  |  |  |  |  |  |
| chr2 | 44511257       | 44511257     | SNV          | C                             | C:T                                       | 9     |                                           | 0     |  |  |  |  |  |  |
| chr2 | 44507809       | 44507809     | SNV          | C                             | A:C                                       | 6     |                                           | 0     |  |  |  |  |  |  |
| chr2 | 44530939       | 44530939     | SNV          | A                             | A:T                                       | 1     |                                           | 0     |  |  |  |  |  |  |
| chr2 | 44506624       | 44506624     | SNV          | G                             | A:G                                       | 13    |                                           | 0     |  |  |  |  |  |  |
| chr2 | 44533583       | 44533583     | SNV          | C                             | C:T                                       | 2     |                                           | 0     |  |  |  |  |  |  |
| chr2 | 44523928       | 44523928     | SNV          | C                             | C:T                                       | 23    |                                           | 0     |  |  |  |  |  |  |
| chr2 | 44545505       | 44545505     | SNV          | C                             | C:T                                       | 4     |                                           | 0     |  |  |  |  |  |  |
| chr2 | 44522859       | 44522859     | SNV          | C                             | C:T                                       | 1     |                                           | 0     |  |  |  |  |  |  |
| chr2 | 44504769       | 44504769     | SNV          | A                             | A:T                                       | 6     |                                           | 0     |  |  |  |  |  |  |
| chr2 | 44536852       | 44536852     | SNV          | C                             | C:G                                       | 1     |                                           | 0     |  |  |  |  |  |  |
| chr2 | 44524280       | 44524280     | SNV          | G                             | C:G                                       | 1     |                                           | 0     |  |  |  |  |  |  |
| chr2 | 44544667       | 44544667     | SNV          | G                             | A:G                                       | 1     |                                           | 0     |  |  |  |  |  |  |
| chr2 | 44538635       | 44538635     | SNV          | A                             | A:G                                       | 2     |                                           | 0     |  |  |  |  |  |  |
| chr2 | 44507473       | 44507473     | SNV          | G                             | C:G                                       | 3     |                                           | 0     |  |  |  |  |  |  |
| chr2 | 44530366       | 44530366     | SNV          | A                             | A:G                                       | 1     |                                           | 0     |  |  |  |  |  |  |
| chr2 | 44542334       | 44542334     | SNV          | G                             | G:T                                       | 1     |                                           | 0     |  |  |  |  |  |  |
| chr2 | 44504743       | 44504743     | SNV          | C                             | C:T                                       | 3     |                                           | 0     |  |  |  |  |  |  |
| chr2 | 44514217       | 44514217     | SNV          | C                             | C:T                                       | 1     |                                           | 0     |  |  |  |  |  |  |
| chr2 | 44508100       | 44508100     | SNV          | A                             | A:G                                       | 1     |                                           | 0     |  |  |  |  |  |  |
| chr2 | 44517016       | 44517016     | SNV          | C                             | C:T                                       | 12    |                                           | 0     |  |  |  |  |  |  |
| chr2 | 44511802       | 44511802     | SNV          | A                             | A:G                                       | 1     |                                           | 0     |  |  |  |  |  |  |
| chr2 | 44535384       | 44535384     | SNV          | T                             | G:T                                       | 1     |                                           | 0     |  |  |  |  |  |  |
| chr2 | 44513735       | 44513735     | SNV          | G                             | C:G                                       | 9     |                                           | 0     |  |  |  |  |  |  |
| chr2 | 44533561       | 44533561     | SNV          | G                             | A:G                                       | 2     |                                           | 0     |  |  |  |  |  |  |
| chr2 | 44518185       | 44518185     | SNV          | A                             | A:C                                       | 1     |                                           | 0     |  |  |  |  |  |  |
| chr2 | 44513734       | 44513734     | SNV          | G                             | A:G                                       | 9     |                                           | 0     |  |  |  |  |  |  |
| chr2 | 44524052       | 44524052     | SNV          | G                             | G:T                                       | 1     |                                           | 0     |  |  |  |  |  |  |
| chr2 | 44524642       | 44524642     | SNV          | C                             | C:T                                       | 1     |                                           | 0     |  |  |  |  |  |  |
| chr2 | 44507417       | 44507417     | SNV          | G                             | A:G                                       | 3     |                                           | 0     |  |  |  |  |  |  |
| chr2 | 44536164       | 44536164     | SNV          | C                             | C:G                                       | 5     |                                           | 0     |  |  |  |  |  |  |
| chr2 | 44522741       | 44522741     | SNV          | A                             | A:C                                       | 8     |                                           | 0     |  |  |  |  |  |  |
| chr2 | 44545092       | 44545092     | SNV          | G                             | C:G                                       | 2     |                                           | 0     |  |  |  |  |  |  |
| chr2 | 44533197       | 44533197     | SNV          | C                             | C:T                                       | 1     |                                           | 0     |  |  |  |  |  |  |
| chr2 | 44527547       | 44527547     | SNV          | C                             | C:T                                       | 1     |                                           | 0     |  |  |  |  |  |  |
| chr2 | 44526544       | 44526544     | SNV          | G                             | A:G                                       | 33    | A:A                                       | 1     |  |  |  |  |  |  |
| chr2 | 44520540       | 44520540     | SNV          | C                             | C:T                                       | 1     |                                           | 0     |  |  |  |  |  |  |
| chr2 | 44508364       | 44508364     | SNV          | C                             | C:T                                       | 2     |                                           | 0     |  |  |  |  |  |  |
| chr2 | 44512084       | 44512084     | SNV          | C                             | A:C                                       | 7     |                                           | 0     |  |  |  |  |  |  |
| chr2 | 44536860       | 44536860     | SNV          | C                             | C:G                                       | 1     |                                           | 0     |  |  |  |  |  |  |
| chr2 | 44546476       | 44546477     | deletion     | TT                            | -:TT                                      | 6     |                                           | 0     |  |  |  |  |  |  |
| chr2 | 44515750       | 44515750     | SNV          | T                             | A:T                                       | 13    |                                           | 0     |  |  |  |  |  |  |
| chr2 | 44529906       | 44529906     | SNV          | A                             | A:G                                       | 1     |                                           | 0     |  |  |  |  |  |  |
| chr2 | 44531907       | 44531907     | SNV          | C                             | C:T                                       | 34    | T:T                                       | 1     |  |  |  |  |  |  |
| chr2 | 44545495       | 44545495     | SNV          | G                             | C:G                                       | 4     |                                           | 0     |  |  |  |  |  |  |
| chr2 | 44511942       | 44511942     | SNV          | C                             | C:G                                       | 2     |                                           | 0     |  |  |  |  |  |  |
| chr2 | 44511336       | 44511336     | SNV          | A                             | A:G                                       | 3     |                                           | 0     |  |  |  |  |  |  |
| chr2 | 44527409       | 44527409     | SNV          | T                             | C:T                                       | 1     |                                           | 0     |  |  |  |  |  |  |
| chr2 | 44508488       | 44508488     | SNV          | A                             | A:T                                       | 7     |                                           | 0     |  |  |  |  |  |  |
| chr2 | 44519665       | 44519665     | SNV          | G                             | C:G                                       | 6     |                                           | 0     |  |  |  |  |  |  |
| chr2 | 44547140       | 44547140     | SNV          | G                             | A:G                                       | 10    |                                           | 0     |  |  |  |  |  |  |
| chr2 | 44539703       | 44539703     | SNV          | C                             | C:G                                       | 3     |                                           | 0     |  |  |  |  |  |  |
| chr2 | 44524114       | 44524114     | insertion    | -                             | -:C                                       | 14    |                                           | 0     |  |  |  |  |  |  |
| chr2 | 44526515       | 44526515     | SNV          | C                             | C:T                                       | 2     |                                           | 0     |  |  |  |  |  |  |
| chr2 | 44510407       | 44510407     | SNV          | G                             | A:G                                       | 14    |                                           | 0     |  |  |  |  |  |  |
| chr2 | 44531415       | 44531415     | SNV          | G V                           | C:G L:V                                   | 1     |                                           | 0     |  |  |  |  |  |  |
| chr2 | 44524791       | 44524791     | SNV          | C                             | C:T                                       | 2     |                                           | 0     |  |  |  |  |  |  |
| chr2 | 44537800       | 44537800     | SNV          | T                             | A:T                                       | 1     |                                           | 0     |  |  |  |  |  |  |
| chr2 | 44509883       | 44509883     | SNV          | G                             | A:G                                       | 8     |                                           | 0     |  |  |  |  |  |  |
| chr2 | 44525398       | 44525398     | SNV          | C                             | C:G                                       | 1     |                                           | 0     |  |  |  |  |  |  |

Supplementary Table 1. Variants of SLC3A1 in the 1KG database

| Chr  | Start Position | End Position | Variant type | Ref Genotype   Ref Proteotype | Variant Genotype 1   Variant Proteotype 1 | Count | Variant Genotype 2   Variant Proteotype 2 | Count |  |  |  |  |  |  |
|------|----------------|--------------|--------------|-------------------------------|-------------------------------------------|-------|-------------------------------------------|-------|--|--|--|--|--|--|
| chr2 | 44509324       | 44509324     | SNV          | T                             | A:T                                       | 1     |                                           | 0     |  |  |  |  |  |  |
| chr2 | 44547386       | 44547386     | SNV          | A S                           | A:G S:G                                   | 1     |                                           | 0     |  |  |  |  |  |  |
| chr2 | 44510932       | 44510932     | SNV          | A                             | A:G                                       | 1     |                                           | 0     |  |  |  |  |  |  |
| chr2 | 44536208       | 44536208     | SNV          | A                             | A:G                                       | 9     |                                           | 0     |  |  |  |  |  |  |
| chr2 | 44505721       | 44505721     | SNV          | C                             | C:T                                       | 13    |                                           | 0     |  |  |  |  |  |  |
| chr2 | 44541704       | 44541704     | SNV          | T                             | G:T                                       | 1     |                                           | 0     |  |  |  |  |  |  |
| chr2 | 44539044       | 44539044     | SNV          | A                             | A:T                                       | 1     |                                           | 0     |  |  |  |  |  |  |
| chr2 | 44531597       | 44531597     | SNV          | T                             | C:T                                       | 1     |                                           | 0     |  |  |  |  |  |  |
| chr2 | 44507416       | 44507416     | SNV          | C                             | C:T                                       | 1     |                                           | 0     |  |  |  |  |  |  |
| chr2 | 44523759       | 44523759     | SNV          | A                             | A:G                                       | 3     |                                           | 0     |  |  |  |  |  |  |
| chr2 | 44524853       | 44524853     | SNV          | G                             | A:G                                       | 2     |                                           | 0     |  |  |  |  |  |  |
| chr2 | 44517351       | 44517351     | SNV          | C                             | A:C                                       | 4     |                                           | 0     |  |  |  |  |  |  |
| chr2 | 44529574       | 44529574     | SNV          | C                             | C:G                                       | 1     |                                           | 0     |  |  |  |  |  |  |
| chr2 | 44510158       | 44510158     | SNV          | A                             | A:G                                       | 1     |                                           | 0     |  |  |  |  |  |  |
| chr2 | 44526327       | 44526327     | SNV          | G                             | A:G                                       | 8     |                                           | 0     |  |  |  |  |  |  |
| chr2 | 44506778       | 44506780     | deletion     | AAG                           | --AAG                                     | 5     |                                           | 0     |  |  |  |  |  |  |
| chr2 | 44546622       | 44546622     | SNV          | T                             | G:T                                       | 2     |                                           | 0     |  |  |  |  |  |  |
| chr2 | 44545126       | 44545126     | SNV          | T                             | C:T                                       | 12    |                                           | 0     |  |  |  |  |  |  |
| chr2 | 44504766       | 44504766     | SNV          | A                             | A:G                                       | 1     |                                           | 0     |  |  |  |  |  |  |
| chr2 | 44542605       | 44542605     | SNV          | T                             | G:T                                       | 11    |                                           | 0     |  |  |  |  |  |  |
| chr2 | 44527097       | 44527097     | SNV          | T                             | G:T                                       | 1     |                                           | 0     |  |  |  |  |  |  |
| chr2 | 44517857       | 44517857     | SNV          | C                             | C:T                                       | 2     |                                           | 0     |  |  |  |  |  |  |
| chr2 | 44515290       | 44515290     | SNV          | C                             | C:T                                       | 3     |                                           | 0     |  |  |  |  |  |  |
| chr2 | 44528119       | 44528119     | SNV          | C                             | C:T                                       | 12    |                                           | 0     |  |  |  |  |  |  |
| chr2 | 44537775       | 44537775     | SNV          | T                             | C:T                                       | 1     |                                           | 0     |  |  |  |  |  |  |
| chr2 | 44527765       | 44527765     | SNV          | G                             | A:G                                       | 2     |                                           | 0     |  |  |  |  |  |  |
| chr2 | 44520664       | 44520664     | SNV          | A                             | A:G                                       | 14    |                                           | 0     |  |  |  |  |  |  |
| chr2 | 44525956       | 44525956     | SNV          | C                             | C:G                                       | 3     |                                           | 0     |  |  |  |  |  |  |
| chr2 | 44514511       | 44514511     | SNV          | A                             | A:G                                       | 1     |                                           | 0     |  |  |  |  |  |  |
| chr2 | 44545367       | 44545367     | SNV          | T                             | C:T                                       | 6     |                                           | 0     |  |  |  |  |  |  |
| chr2 | 44506727       | 44506727     | SNV          | G                             | A:G                                       | 1     |                                           | 0     |  |  |  |  |  |  |
| chr2 | 44527006       | 44527006     | SNV          | A                             | A:G                                       | 2     |                                           | 0     |  |  |  |  |  |  |
| chr2 | 44544789       | 44544791     | deletion     | AAT                           | --AAT                                     | 7     |                                           | 0     |  |  |  |  |  |  |
| chr2 | 44519294       | 44519294     | SNV          | T                             | C:T                                       | 2     |                                           | 0     |  |  |  |  |  |  |
| chr2 | 44504489       | 44504489     | insertion    | -                             | :-C                                       | 8     |                                           | 0     |  |  |  |  |  |  |
| chr2 | 44525292       | 44525292     | SNV          | T                             | A:T                                       | 1     |                                           | 0     |  |  |  |  |  |  |
| chr2 | 44502696       | 44502696     | SNV          | A R                           | A:G R:G                                   | 1     |                                           | 0     |  |  |  |  |  |  |
| chr2 | 44536995       | 44536995     | SNV          | C                             | C:T                                       | 1     |                                           | 0     |  |  |  |  |  |  |
| chr2 | 44539773       | 44539773     | SNV          | T Y                           | C:T H:Y                                   | 4     |                                           | 0     |  |  |  |  |  |  |
| chr2 | 44544925       | 44544925     | SNV          | T                             | C:T                                       | 1     |                                           | 0     |  |  |  |  |  |  |
| chr2 | 44523050       | 44523050     | SNV          | A                             | A:C                                       | 2     |                                           | 0     |  |  |  |  |  |  |
| chr2 | 44525085       | 44525085     | SNV          | T                             | C:T                                       | 3     |                                           | 0     |  |  |  |  |  |  |
| chr2 | 44524897       | 44524897     | SNV          | C                             | C:T                                       | 8     |                                           | 0     |  |  |  |  |  |  |
| chr2 | 44541037       | 44541037     | SNV          | G A                           | G:T A:S                                   | 1     |                                           | 0     |  |  |  |  |  |  |
| chr2 | 44507412       | 44507412     | SNV          | C                             | C:G                                       | 1     |                                           | 0     |  |  |  |  |  |  |
| chr2 | 44517437       | 44517437     | SNV          | C                             | C:T                                       | 1     |                                           | 0     |  |  |  |  |  |  |
| chr2 | 44528058       | 44528058     | SNV          | A                             | A:G                                       | 3     |                                           | 0     |  |  |  |  |  |  |
| chr2 | 44535992       | 44535992     | SNV          | C                             | C:T                                       | 1     |                                           | 0     |  |  |  |  |  |  |
| chr2 | 44522098       | 44522098     | SNV          | G                             | G:T                                       | 9     |                                           | 0     |  |  |  |  |  |  |
| chr2 | 44508931       | 44508931     | SNV          | C                             | C:G                                       | 1     |                                           | 0     |  |  |  |  |  |  |
| chr2 | 44525378       | 44525378     | SNV          | G                             | A:G                                       | 8     |                                           | 0     |  |  |  |  |  |  |
| chr2 | 44512600       | 44512600     | SNV          | C                             | A:C                                       | 1     |                                           | 0     |  |  |  |  |  |  |
| chr2 | 44535278       | 44535278     | SNV          | A                             | A:G                                       | 14    |                                           | 0     |  |  |  |  |  |  |
| chr2 | 44531523       | 44531523     | SNV          | T                             | G:T                                       | 1     |                                           | 0     |  |  |  |  |  |  |
| chr2 | 44547910       | 44547910     | SNV          | G                             | A:G                                       | 1     |                                           | 0     |  |  |  |  |  |  |
| chr2 | 44521462       | 44521468     | deletion     | GGTGAAA                       | --GGTGAAA                                 | 6     |                                           | 0     |  |  |  |  |  |  |
| chr2 | 44547273       | 44547273     | SNV          | T                             | A:T                                       | 1     |                                           | 0     |  |  |  |  |  |  |
| chr2 | 44533610       | 44533610     | SNV          | A                             | A:T                                       | 4     |                                           | 0     |  |  |  |  |  |  |
| chr2 | 44538696       | 44538696     | SNV          | T                             | G:T                                       | 1     |                                           | 0     |  |  |  |  |  |  |
| chr2 | 44539790       | 44539790     | SNV          | C N                           | C:T N:N                                   | 2     |                                           | 0     |  |  |  |  |  |  |
| chr2 | 44521316       | 44521316     | SNV          | G                             | C:G                                       | 3     |                                           | 0     |  |  |  |  |  |  |
| chr2 | 44526092       | 44526092     | SNV          | C                             | C:G                                       | 2     |                                           | 0     |  |  |  |  |  |  |
| chr2 | 44544674       | 44544674     | SNV          | C                             | C:T                                       | 2     |                                           | 0     |  |  |  |  |  |  |
| chr2 | 44535797       | 44535797     | SNV          | A                             | A:G                                       | 1     |                                           | 0     |  |  |  |  |  |  |
| chr2 | 44520663       | 44520663     | SNV          | A                             | A:G                                       | 1     |                                           | 0     |  |  |  |  |  |  |
| chr2 | 44507567       | 44507567     | SNV          | G                             | A:G                                       | 5     |                                           | 0     |  |  |  |  |  |  |
| chr2 | 44506147       | 44506147     | SNV          | T                             | C:T                                       | 1     |                                           | 0     |  |  |  |  |  |  |
| chr2 | 44518858       | 44518858     | SNV          | G                             | A:G                                       | 1     |                                           | 0     |  |  |  |  |  |  |
| chr2 | 44533100       | 44533100     | SNV          | C                             | C:T                                       | 1     |                                           | 0     |  |  |  |  |  |  |
| chr2 | 44526242       | 44526242     | SNV          | A                             | A:T                                       | 4     |                                           | 0     |  |  |  |  |  |  |
| chr2 | 44539039       | 44539039     | SNV          | G                             | A:G                                       | 1     |                                           | 0     |  |  |  |  |  |  |
| chr2 | 44539866       | 44539866     | SNV          | G A                           | A:G T:A                                   | 1     |                                           | 0     |  |  |  |  |  |  |
| chr2 | 44525234       | 44525234     | SNV          | T                             | C:T                                       | 3     |                                           | 0     |  |  |  |  |  |  |
| chr2 | 44508340       | 44508340     | SNV          | C                             | C:T                                       | 1     |                                           | 0     |  |  |  |  |  |  |
| chr2 | 44513595       | 44513595     | SNV          | C                             | C:T                                       | 6     |                                           | 0     |  |  |  |  |  |  |
| chr2 | 44544735       | 44544735     | SNV          | G                             | A:G                                       | 2     |                                           | 0     |  |  |  |  |  |  |
| chr2 | 44537210       | 44537210     | SNV          | T                             | G:T                                       | 1     |                                           | 0     |  |  |  |  |  |  |
| chr2 | 44513168       | 44513168     | SNV          | C                             | C:T                                       | 1     |                                           | 0     |  |  |  |  |  |  |
| chr2 | 44540754       | 44540754     | SNV          | T                             | C:T                                       | 1     |                                           | 0     |  |  |  |  |  |  |
| chr2 | 44537217       | 44537217     | SNV          | G                             | G:T                                       | 1     |                                           | 0     |  |  |  |  |  |  |
| chr2 | 44522291       | 44522291     | SNV          | G                             | G:T                                       | 1     |                                           | 0     |  |  |  |  |  |  |
| chr2 | 44506706       | 44506706     | SNV          | C                             | C:T                                       | 1     |                                           | 0     |  |  |  |  |  |  |
| chr2 | 44519830       | 44519830     | SNV          | A                             | A:G                                       | 1     |                                           | 0     |  |  |  |  |  |  |
| chr2 | 44525250       | 44525250     | SNV          | G                             | A:G                                       | 5     |                                           | 0     |  |  |  |  |  |  |
| chr2 | 44545620       | 44545620     | SNV          | C                             | C:T                                       | 1     |                                           | 0     |  |  |  |  |  |  |
| chr2 | 44502964       | 44502964     | SNV          | T V                           | C:T A:V                                   | 2     |                                           | 0     |  |  |  |  |  |  |
| chr2 | 44506511       | 44506511     | SNV          | C                             | C:T                                       | 8     |                                           | 0     |  |  |  |  |  |  |
| chr2 | 44543457       | 44543457     | SNV          | T                             | C:T                                       | 2     |                                           | 0     |  |  |  |  |  |  |
| chr2 | 44515288       | 44515288     | SNV          | T                             | C:T                                       | 4     |                                           | 0     |  |  |  |  |  |  |
| chr2 | 44541539       | 44541539     | SNV          | T                             | C:T                                       | 1     |                                           | 0     |  |  |  |  |  |  |
| chr2 | 44519054       | 44519054     | SNV          | G                             | A:G                                       | 1     |                                           | 0     |  |  |  |  |  |  |
| chr2 | 44529545       | 44529545     | SNV          | T                             | A:T                                       | 1     |                                           | 0     |  |  |  |  |  |  |
| chr2 | 44547082       | 44547082     | SNV          | A                             | A:T                                       | 4     |                                           | 0     |  |  |  |  |  |  |
| chr2 | 44526486       | 44526486     | SNV          | C                             | C:T                                       | 1     |                                           | 0     |  |  |  |  |  |  |

Supplementary Table 1. Variants of SLC3A1 in the 1KG database

| Chr  | Start Position | End Position | Variant type | Ref Genotype | Ref Proteotype | Variant Genotype 1 | Variant Proteotype 1 | Count | Variant Genotype 2 | Variant Proteotype 2 | Count |  |  |  |  |  |
|------|----------------|--------------|--------------|--------------|----------------|--------------------|----------------------|-------|--------------------|----------------------|-------|--|--|--|--|--|
| chr2 | 44512887       | 44512887     | SNV          | G            |                | C                  | G                    | 2     |                    |                      | 0     |  |  |  |  |  |
| chr2 | 44542190       | 44542190     | SNV          | C            |                | T                  | T                    | 1     | C:T                |                      | 33    |  |  |  |  |  |
| chr2 | 44524258       | 44524258     | SNV          | T            |                | A                  | T                    | 4     |                    |                      | 0     |  |  |  |  |  |
| chr2 | 44539465       | 44539465     | SNV          | G            |                | G                  | T                    | 1     |                    |                      | 0     |  |  |  |  |  |
| chr2 | 44547699       | 44547699     | SNV          | C T          |                | C                  | G T:R                | 1     |                    |                      | 0     |  |  |  |  |  |
| chr2 | 44515209       | 44515209     | SNV          | C            |                | C                  | T                    | 2     |                    |                      | 0     |  |  |  |  |  |
| chr2 | 44516947       | 44516947     | SNV          | T            |                | G                  | T                    | 2     |                    |                      | 0     |  |  |  |  |  |
| chr2 | 44510894       | 44510894     | SNV          | C            |                | A                  | C                    | 4     |                    |                      | 0     |  |  |  |  |  |
| chr2 | 44539419       | 44539419     | SNV          | G            |                | C                  | G                    | 8     |                    |                      | 0     |  |  |  |  |  |
| chr2 | 44507978       | 44507978     | SNV          | C P          |                | A                  | C H:P                | 1     |                    |                      | 0     |  |  |  |  |  |
| chr2 | 44502916       | 44502916     | SNV          | G R          |                | A                  | G H:R                | 1     |                    |                      | 0     |  |  |  |  |  |
| chr2 | 44527813       | 44527813     | SNV          | A            |                | A                  | G                    | 1     |                    |                      | 0     |  |  |  |  |  |
| chr2 | 44547196       | 44547196     | SNV          | A            |                | A                  | T                    | 1     |                    |                      | 0     |  |  |  |  |  |
| chr2 | 44521724       | 44521724     | SNV          | T            |                | C                  | T                    | 1     |                    |                      | 0     |  |  |  |  |  |
| chr2 | 44514488       | 44514488     | SNV          | G            |                | C                  | G                    | 1     |                    |                      | 0     |  |  |  |  |  |
| chr2 | 44505045       | 44505045     | SNV          | A            |                | A                  | G                    | 33    |                    |                      | 0     |  |  |  |  |  |
| chr2 | 44503123       | 44503123     | SNV          | T            |                | A                  | T                    | 1     |                    |                      | 0     |  |  |  |  |  |
| chr2 | 44525904       | 44525904     | SNV          | C            |                | C                  | T                    | 1     |                    |                      | 0     |  |  |  |  |  |
| chr2 | 44503634       | 44503634     | SNV          | G            |                | A                  | G                    | 1     |                    |                      | 0     |  |  |  |  |  |
| chr2 | 44535323       | 44535323     | SNV          | C            |                | C                  | G                    | 3     |                    |                      | 0     |  |  |  |  |  |
| chr2 | 44524214       | 44524214     | SNV          | A            |                | A                  | G                    | 9     |                    |                      | 0     |  |  |  |  |  |
| chr2 | 44536072       | 44536072     | SNV          | C            |                | C                  | T                    | 15    |                    |                      | 0     |  |  |  |  |  |
| chr2 | 44527450       | 44527450     | SNV          | G            |                | G                  | T                    | 3     |                    |                      | 0     |  |  |  |  |  |
| chr2 | 44532885       | 44532885     | SNV          | A            |                | A                  | T                    | 1     |                    |                      | 0     |  |  |  |  |  |
| chr2 | 44541606       | 44541606     | SNV          | T            |                | C                  | T                    | 2     |                    |                      | 0     |  |  |  |  |  |
| chr2 | 44509911       | 44509911     | SNV          | C            |                | C                  | T                    | 2     |                    |                      | 0     |  |  |  |  |  |
| chr2 | 44506965       | 44506965     | SNV          | G            |                | A                  | G                    | 1     |                    |                      | 0     |  |  |  |  |  |
| chr2 | 44528099       | 44528099     | SNV          | A            |                | A                  | T                    | 1     |                    |                      | 0     |  |  |  |  |  |
| chr2 | 44544840       | 44544840     | SNV          | A            |                | A                  | G                    | 1     |                    |                      | 0     |  |  |  |  |  |
| chr2 | 44528193       | 44528193     | SNV          | G V          |                | A                  | G M:V                | 1     |                    |                      | 0     |  |  |  |  |  |
| chr2 | 44528601       | 44528601     | SNV          | C            |                | C                  | T                    | 5     |                    |                      | 0     |  |  |  |  |  |
| chr2 | 44545291       | 44545291     | SNV          | G            |                | A                  | G                    | 1     |                    |                      | 0     |  |  |  |  |  |
| chr2 | 44530353       | 44530353     | insertion    | -            |                | -                  | A                    | 4     |                    |                      | 0     |  |  |  |  |  |
| chr2 | 44547327       | 44547327     | SNV          | A            |                | A                  | T                    | 4     |                    |                      | 0     |  |  |  |  |  |
| chr2 | 44538121       | 44538121     | SNV          | C            |                | A                  | C                    | 2     |                    |                      | 0     |  |  |  |  |  |
| chr2 | 44506000       | 44506000     | SNV          | A            |                | A                  | G                    | 1     |                    |                      | 0     |  |  |  |  |  |
| chr2 | 44546593       | 44546593     | SNV          | G            |                | C                  | G                    | 8     |                    |                      | 0     |  |  |  |  |  |
| chr2 | 44505064       | 44505064     | SNV          | A            |                | A                  | C                    | 1     |                    |                      | 0     |  |  |  |  |  |
| chr2 | 44547931       | 44547931     | SNV          | T            |                | C                  | T                    | 1     |                    |                      | 0     |  |  |  |  |  |
| chr2 | 44506992       | 44506992     | SNV          | A            |                | C                  | C                    | 1     | A:C                |                      | 7     |  |  |  |  |  |
| chr2 | 44530065       | 44530065     | SNV          | C            |                | C                  | T                    | 2     |                    |                      | 0     |  |  |  |  |  |
| chr2 | 44510127       | 44510127     | SNV          | C            |                | C                  | T                    | 1     |                    |                      | 0     |  |  |  |  |  |
| chr2 | 44525201       | 44525201     | SNV          | C            |                | C                  | T                    | 7     |                    |                      | 0     |  |  |  |  |  |
| chr2 | 44519049       | 44519049     | SNV          | G            |                | A                  | G                    | 61    | A:A                |                      | 2     |  |  |  |  |  |
| chr2 | 44518802       | 44518802     | SNV          | G            |                | A                  | G                    | 6     |                    |                      | 0     |  |  |  |  |  |
| chr2 | 44505492       | 44505492     | SNV          | C            |                | C                  | T                    | 1     |                    |                      | 0     |  |  |  |  |  |
| chr2 | 44531251       | 44531251     | SNV          | C            |                | C                  | T                    | 4     |                    |                      | 0     |  |  |  |  |  |
| chr2 | 44546516       | 44546516     | SNV          | A            |                | A                  | G                    | 1     |                    |                      | 0     |  |  |  |  |  |
| chr2 | 44505410       | 44505410     | SNV          | C            |                | C                  | T                    | 3     |                    |                      | 0     |  |  |  |  |  |
| chr2 | 44518084       | 44518084     | SNV          | C            |                | C                  | T                    | 1     |                    |                      | 0     |  |  |  |  |  |
| chr2 | 44508200       | 44508200     | SNV          | C            |                | C                  | T                    | 15    |                    |                      | 0     |  |  |  |  |  |
| chr2 | 44529897       | 44529897     | SNV          | C            |                | C                  | T                    | 1     |                    |                      | 0     |  |  |  |  |  |
| chr2 | 44530195       | 44530195     | SNV          | C            |                | C                  | T                    | 7     |                    |                      | 0     |  |  |  |  |  |
| chr2 | 44532522       | 44532522     | SNV          | G            |                | A                  | G                    | 4     |                    |                      | 0     |  |  |  |  |  |
| chr2 | 44503202       | 44503202     | SNV          | A            |                | A                  | G                    | 1     |                    |                      | 0     |  |  |  |  |  |
| chr2 | 44546648       | 44546648     | SNV          | A            |                | A                  | C                    | 1     |                    |                      | 0     |  |  |  |  |  |
| chr2 | 44529506       | 44529506     | SNV          | A            |                | A                  | G                    | 1     |                    |                      | 0     |  |  |  |  |  |
| chr2 | 44522828       | 44522828     | SNV          | T            |                | C                  | T                    | 9     |                    |                      | 0     |  |  |  |  |  |
| chr2 | 44515502       | 44515502     | SNV          | C            |                | C                  | T                    | 1     |                    |                      | 0     |  |  |  |  |  |
| chr2 | 44514534       | 44514534     | SNV          | G            |                | A                  | A                    | 2     | A:G                |                      | 60    |  |  |  |  |  |
| chr2 | 44516418       | 44516418     | SNV          | C            |                | C                  | T                    | 3     |                    |                      | 0     |  |  |  |  |  |
| chr2 | 44541668       | 44541668     | SNV          | T            |                | A                  | T                    | 1     |                    |                      | 0     |  |  |  |  |  |
| chr2 | 44544246       | 44544246     | deletion     | CT           |                | -                  | CT                   | 8     |                    |                      | 0     |  |  |  |  |  |
| chr2 | 44540855       | 44540855     | SNV          | G            |                | A                  | G                    | 1     |                    |                      | 0     |  |  |  |  |  |
| chr2 | 44520650       | 44520650     | SNV          | C            |                | C                  | T                    | 1     |                    |                      | 0     |  |  |  |  |  |
| chr2 | 44536061       | 44536061     | SNV          | C            |                | C                  | T                    | 3     |                    |                      | 0     |  |  |  |  |  |
| chr2 | 44540745       | 44540745     | SNV          | C            |                | C                  | T                    | 3     |                    |                      | 0     |  |  |  |  |  |
| chr2 | 44527871       | 44527871     | SNV          | C            |                | C                  | T                    | 2     |                    |                      | 0     |  |  |  |  |  |
| chr2 | 44547122       | 44547122     | SNV          | T            |                | C                  | T                    | 1     |                    |                      | 0     |  |  |  |  |  |
| chr2 | 44522036       | 44522036     | insertion    | -            |                | -                  | T                    | 24    |                    |                      | 0     |  |  |  |  |  |
| chr2 | 44534232       | 44534232     | SNV          | C            |                | C                  | G                    | 1     |                    |                      | 0     |  |  |  |  |  |
| chr2 | 44533997       | 44533997     | SNV          | A            |                | A                  | C                    | 10    |                    |                      | 0     |  |  |  |  |  |
| chr2 | 44536081       | 44536081     | SNV          | C            |                | C                  | T                    | 1     |                    |                      | 0     |  |  |  |  |  |
| chr2 | 44534564       | 44534564     | SNV          | C            |                | A                  | C                    | 8     |                    |                      | 0     |  |  |  |  |  |
| chr2 | 44542660       | 44542660     | SNV          | G            |                | C                  | G                    | 1     |                    |                      | 0     |  |  |  |  |  |
| chr2 | 44524652       | 44524652     | SNV          | T            |                | G                  | T                    | 8     |                    |                      | 0     |  |  |  |  |  |
| chr2 | 44547263       | 44547263     | SNV          | T            |                | G                  | T                    | 5     |                    |                      | 0     |  |  |  |  |  |
| chr2 | 44502987       | 44502987     | SNV          | A I          |                | A                  | G I:V                | 2     |                    |                      | 0     |  |  |  |  |  |
| chr2 | 44513854       | 44513854     | SNV          | T            |                | C                  | T                    | 9     |                    |                      | 0     |  |  |  |  |  |
| chr2 | 44513637       | 44513637     | SNV          | C            |                | C                  | T                    | 1     |                    |                      | 0     |  |  |  |  |  |
| chr2 | 44515434       | 44515434     | SNV          | G            |                | C                  | G                    | 8     |                    |                      | 0     |  |  |  |  |  |
| chr2 | 44503745       | 44503745     | SNV          | G            |                | A                  | G                    | 1     |                    |                      | 0     |  |  |  |  |  |
| chr2 | 44544571       | 44544571     | SNV          | A            |                | A                  | G                    | 1     |                    |                      | 0     |  |  |  |  |  |
| chr2 | 44546571       | 44546571     | SNV          | C            |                | A                  | C                    | 1     |                    |                      | 0     |  |  |  |  |  |
| chr2 | 44541415       | 44541415     | SNV          | C            |                | A                  | C                    | 1     |                    |                      | 0     |  |  |  |  |  |
| chr2 | 44526721       | 44526721     | SNV          | T            |                | C                  | T                    | 5     |                    |                      | 0     |  |  |  |  |  |
| chr2 | 44507578       | 44507578     | SNV          | A            |                | A                  | T                    | 1     |                    |                      | 0     |  |  |  |  |  |
| chr2 | 44527352       | 44527356     | deletion     | TGATT        |                | -                  | TGATT                | 3     |                    |                      | 0     |  |  |  |  |  |
| chr2 | 44532707       | 44532707     | SNV          | C            |                | C                  | G                    | 1     |                    |                      | 0     |  |  |  |  |  |
| chr2 | 44527697       | 44527697     | SNV          | A            |                | A                  | G                    | 2     |                    |                      | 0     |  |  |  |  |  |
| chr2 | 44541751       | 44541751     | SNV          | T            |                | A                  | T                    | 33    | A:A                |                      | 1     |  |  |  |  |  |
| chr2 | 44524281       | 44524281     | SNV          | C            |                | C                  | T                    | 1     |                    |                      | 0     |  |  |  |  |  |
| chr2 | 44510145       | 44510145     | SNV          | G            |                | G                  | T                    | 1     |                    |                      | 0     |  |  |  |  |  |
| chr2 | 44520361       | 44520361     | SNV          | G            |                | A                  | G                    | 2     |                    |                      | 0     |  |  |  |  |  |

Supplementary Table 1. Variants of SLC3A1 in the 1KG database

| Chr  | Start Position | End Position | Variant type | Ref Genotype   Ref Proteotype | Variant Genotype 1   Variant Proteotype 1 | Count | Variant Genotype 2   Variant Proteotype 2 | Count |  |  |  |  |  |  |
|------|----------------|--------------|--------------|-------------------------------|-------------------------------------------|-------|-------------------------------------------|-------|--|--|--|--|--|--|
| chr2 | 44547487       | 44547487     | SNV          | C I                           | C:T I:I                                   | 1     |                                           | 0     |  |  |  |  |  |  |
| chr2 | 44515349       | 44515349     | SNV          | G                             | C:G                                       | 1     |                                           | 0     |  |  |  |  |  |  |
| chr2 | 44516692       | 44516692     | SNV          | T                             | C:T                                       | 1     |                                           | 0     |  |  |  |  |  |  |
| chr2 | 44539782       | 44539782     | SNV          | G V                           | A:G M:V                                   | 1     |                                           | 0     |  |  |  |  |  |  |
| chr2 | 44525968       | 44525968     | SNV          | G                             | G:T                                       | 1     |                                           | 0     |  |  |  |  |  |  |
| chr2 | 44505467       | 44505467     | SNV          | T                             | G:T                                       | 1     |                                           | 0     |  |  |  |  |  |  |
| chr2 | 44530754       | 44530754     | SNV          | T                             | C:T                                       | 1     |                                           | 0     |  |  |  |  |  |  |
| chr2 | 44515546       | 44515546     | SNV          | C                             | A:C                                       | 1     |                                           | 0     |  |  |  |  |  |  |
| chr2 | 44534777       | 44534777     | SNV          | T                             | C:T                                       | 1     |                                           | 0     |  |  |  |  |  |  |
| chr2 | 44538901       | 44538901     | SNV          | A                             | A:G                                       | 1     |                                           | 0     |  |  |  |  |  |  |
| chr2 | 44503231       | 44503231     | SNV          | A                             | A:C                                       | 1     |                                           | 0     |  |  |  |  |  |  |
| chr2 | 44524988       | 44524988     | SNV          | C                             | C:T                                       | 1     |                                           | 0     |  |  |  |  |  |  |
| chr2 | 44545878       | 44545878     | SNV          | G                             | C:G                                       | 1     |                                           | 0     |  |  |  |  |  |  |
| chr2 | 44545877       | 44545877     | SNV          | T                             | A:T                                       | 2     |                                           | 0     |  |  |  |  |  |  |
| chr2 | 44547172       | 44547172     | SNV          | T                             | C:T                                       | 1     |                                           | 0     |  |  |  |  |  |  |
| chr2 | 44506019       | 44506019     | SNV          | C                             | C:G                                       | 1     |                                           | 0     |  |  |  |  |  |  |
| chr2 | 44531514       | 44531514     | SNV          | C                             | A:C                                       | 1     |                                           | 0     |  |  |  |  |  |  |
| chr2 | 44529153       | 44529153     | SNV          | C                             | C:T                                       | 1     |                                           | 0     |  |  |  |  |  |  |
| chr2 | 44539898       | 44539898     | SNV          | T                             | C:T                                       | 1     |                                           | 0     |  |  |  |  |  |  |
| chr2 | 44547115       | 44547115     | SNV          | G                             | A:G                                       | 1     |                                           | 0     |  |  |  |  |  |  |
| chr2 | 44521929       | 44521929     | SNV          | C                             | C:T                                       | 1     |                                           | 0     |  |  |  |  |  |  |
| chr2 | 44534083       | 44534083     | SNV          | A                             | A:C                                       | 1     |                                           | 0     |  |  |  |  |  |  |
| chr2 | 44517281       | 44517281     | SNV          | C                             | A:C                                       | 2     |                                           | 0     |  |  |  |  |  |  |
| chr2 | 44534155       | 44534155     | SNV          | C                             | A:C                                       | 1     |                                           | 0     |  |  |  |  |  |  |
| chr2 | 44520943       | 44520943     | SNV          | C                             | A:C                                       | 1     |                                           | 0     |  |  |  |  |  |  |
| chr2 | 44504505       | 44504505     | SNV          | C                             | C:T                                       | 1     |                                           | 0     |  |  |  |  |  |  |
| chr2 | 44545421       | 44545421     | SNV          | G                             | A:G                                       | 1     |                                           | 0     |  |  |  |  |  |  |
| chr2 | 44502924       | 44502924     | SNV          | A I                           | A:G I:V                                   | 1     |                                           | 0     |  |  |  |  |  |  |
| chr2 | 44533046       | 44533046     | SNV          | C                             | C:T                                       | 3     |                                           | 0     |  |  |  |  |  |  |
| chr2 | 44511469       | 44511469     | SNV          | G                             | A:G                                       | 1     |                                           | 0     |  |  |  |  |  |  |
| chr2 | 44536341       | 44536341     | SNV          | A                             | A:C                                       | 1     |                                           | 0     |  |  |  |  |  |  |
| chr2 | 44522812       | 44522812     | SNV          | A                             | A:C                                       | 1     |                                           | 0     |  |  |  |  |  |  |
| chr2 | 44512036       | 44512036     | SNV          | A                             | A:C                                       | 1     |                                           | 0     |  |  |  |  |  |  |
| chr2 | 44544122       | 44544122     | SNV          | C                             | C:G                                       | 1     |                                           | 0     |  |  |  |  |  |  |
| chr2 | 44521572       | 44521572     | SNV          | A                             | A:C                                       | 1     |                                           | 0     |  |  |  |  |  |  |
| chr2 | 44506418       | 44506418     | SNV          | C                             | C:T                                       | 1     |                                           | 0     |  |  |  |  |  |  |
| chr2 | 44518662       | 44518662     | SNV          | A                             | A:G                                       | 1     |                                           | 0     |  |  |  |  |  |  |
| chr2 | 44506493       | 44506493     | SNV          | C                             | C:T                                       | 2     |                                           | 0     |  |  |  |  |  |  |
| chr2 | 44503050       | 44503050     | SNV          | A I                           | A:G I:V                                   | 1     |                                           | 0     |  |  |  |  |  |  |
| chr2 | 44516575       | 44516575     | SNV          | C                             | C:T                                       | 1     |                                           | 0     |  |  |  |  |  |  |
| chr2 | 44503652       | 44503652     | SNV          | C                             | C:T                                       | 1     |                                           | 0     |  |  |  |  |  |  |
| chr2 | 44514076       | 44514076     | SNV          | T                             | G:T                                       | 1     |                                           | 0     |  |  |  |  |  |  |
| chr2 | 44531279       | 44531279     | SNV          | T                             | C:T                                       | 1     |                                           | 0     |  |  |  |  |  |  |
| chr2 | 44508743       | 44508743     | SNV          | T                             | G:T                                       | 1     |                                           | 0     |  |  |  |  |  |  |
| chr2 | 44504125       | 44504125     | SNV          | G                             | A:G                                       | 2     |                                           | 0     |  |  |  |  |  |  |
| chr2 | 44512431       | 44512431     | SNV          | T                             | A:T                                       | 1     |                                           | 0     |  |  |  |  |  |  |
| chr2 | 44506924       | 44506924     | SNV          | A                             | A:G                                       | 1     |                                           | 0     |  |  |  |  |  |  |
| chr2 | 44503675       | 44503675     | SNV          | G                             | C:G                                       | 1     |                                           | 0     |  |  |  |  |  |  |
| chr2 | 44530318       | 44530318     | SNV          | C                             | C:T                                       | 1     |                                           | 0     |  |  |  |  |  |  |
| chr2 | 44517260       | 44517260     | SNV          | G                             | A:G                                       | 1     |                                           | 0     |  |  |  |  |  |  |
| chr2 | 44513092       | 44513092     | SNV          | G                             | G:T                                       | 6     |                                           | 0     |  |  |  |  |  |  |
| chr2 | 44525413       | 44525413     | SNV          | T                             | C:T                                       | 3     |                                           | 0     |  |  |  |  |  |  |
| chr2 | 44514773       | 44514773     | SNV          | C                             | C:T                                       | 1     |                                           | 0     |  |  |  |  |  |  |
| chr2 | 44503091       | 44503091     | SNV          | C N                           | C:T N:N                                   | 2     |                                           | 0     |  |  |  |  |  |  |
| chr2 | 44503041       | 44503041     | SNV          | A M                           | A:G M:V                                   | 2     |                                           | 0     |  |  |  |  |  |  |
| chr2 | 44525750       | 44525750     | SNV          | C                             | C:T                                       | 1     |                                           | 0     |  |  |  |  |  |  |
| chr2 | 44533277       | 44533277     | SNV          | T                             | G:T                                       | 1     |                                           | 0     |  |  |  |  |  |  |
| chr2 | 44527164       | 44527164     | SNV          | G V                           | A:G I:V                                   | 1     |                                           | 0     |  |  |  |  |  |  |
| chr2 | 44546480       | 44546480     | SNV          | A                             | A:G                                       | 1     |                                           | 0     |  |  |  |  |  |  |
| chr2 | 44532018       | 44532018     | SNV          | T                             | C:T                                       | 2     |                                           | 0     |  |  |  |  |  |  |
| chr2 | 44531775       | 44531775     | SNV          | T                             | C:T                                       | 1     |                                           | 0     |  |  |  |  |  |  |
| chr2 | 44538902       | 44538902     | SNV          | G                             | C:G                                       | 2     |                                           | 0     |  |  |  |  |  |  |
| chr2 | 44534441       | 44534441     | SNV          | G                             | G:T                                       | 1     |                                           | 0     |  |  |  |  |  |  |
| chr2 | 44516473       | 44516473     | SNV          | C                             | A:C                                       | 1     |                                           | 0     |  |  |  |  |  |  |
| chr2 | 44538741       | 44538741     | SNV          | A                             | A:G                                       | 1     |                                           | 0     |  |  |  |  |  |  |
| chr2 | 44542323       | 44542323     | SNV          | C                             | C:T                                       | 1     |                                           | 0     |  |  |  |  |  |  |
| chr2 | 44525287       | 44525287     | SNV          | T                             | C:T                                       | 1     |                                           | 0     |  |  |  |  |  |  |
| chr2 | 44544502       | 44544502     | SNV          | G                             | A:G                                       | 2     |                                           | 0     |  |  |  |  |  |  |
| chr2 | 44521738       | 44521738     | SNV          | A                             | A:C                                       | 1     |                                           | 0     |  |  |  |  |  |  |
| chr2 | 44546701       | 44546701     | SNV          | T                             | C:T                                       | 1     |                                           | 0     |  |  |  |  |  |  |
| chr2 | 44505172       | 44505172     | SNV          | C                             | C:G                                       | 1     |                                           | 0     |  |  |  |  |  |  |
| chr2 | 44515765       | 44515765     | SNV          | G                             | A:G                                       | 1     |                                           | 0     |  |  |  |  |  |  |
| chr2 | 44535730       | 44535730     | SNV          | A                             | A:G                                       | 1     |                                           | 0     |  |  |  |  |  |  |
| chr2 | 44532715       | 44532715     | SNV          | C                             | C:T                                       | 1     |                                           | 0     |  |  |  |  |  |  |
| chr2 | 44546179       | 44546179     | SNV          | T                             | C:T                                       | 3     |                                           | 0     |  |  |  |  |  |  |
| chr2 | 44522215       | 44522215     | SNV          | G                             | G:T                                       | 1     |                                           | 0     |  |  |  |  |  |  |
| chr2 | 44514957       | 44514957     | SNV          | C                             | A:C                                       | 1     |                                           | 0     |  |  |  |  |  |  |
| chr2 | 44526813       | 44526813     | SNV          | C                             | C:G                                       | 5     |                                           | 0     |  |  |  |  |  |  |
| chr2 | 44516579       | 44516579     | SNV          | G                             | A:G                                       | 1     |                                           | 0     |  |  |  |  |  |  |
| chr2 | 44524528       | 44524528     | SNV          | G                             | C:G                                       | 1     |                                           | 0     |  |  |  |  |  |  |
| chr2 | 44505039       | 44505039     | SNV          | T                             | C:T                                       | 1     |                                           | 0     |  |  |  |  |  |  |
| chr2 | 44528161       | 44528161     | SNV          | C S                           | C:T S:L                                   | 2     |                                           | 0     |  |  |  |  |  |  |
| chr2 | 44527124       | 44527124     | SNV          | C F                           | C:T F:F                                   | 1     |                                           | 0     |  |  |  |  |  |  |
| chr2 | 44526977       | 44526977     | SNV          | T                             | G:T                                       | 3     |                                           | 0     |  |  |  |  |  |  |
| chr2 | 44518406       | 44518406     | SNV          | C                             | C:T                                       | 1     |                                           | 0     |  |  |  |  |  |  |
| chr2 | 44506821       | 44506821     | SNV          | A                             | A:T                                       | 1     |                                           | 0     |  |  |  |  |  |  |
| chr2 | 44527882       | 44527882     | SNV          | C                             | C:T                                       | 2     |                                           | 0     |  |  |  |  |  |  |
| chr2 | 44541457       | 44541457     | SNV          | G                             | A:G                                       | 1     |                                           | 0     |  |  |  |  |  |  |
| chr2 | 44537770       | 44537770     | SNV          | G                             | C:G                                       | 1     |                                           | 0     |  |  |  |  |  |  |
| chr2 | 44547624       | 44547624     | SNV          | C T                           | C:T T:I                                   | 1     |                                           | 0     |  |  |  |  |  |  |
| chr2 | 44535397       | 44535397     | SNV          | T                             | G:T                                       | 1     |                                           | 0     |  |  |  |  |  |  |
| chr2 | 44533294       | 44533294     | SNV          | T                             | C:T                                       | 1     |                                           | 0     |  |  |  |  |  |  |
| chr2 | 44545876       | 44545876     | SNV          | T                             | C:T                                       | 1     |                                           | 0     |  |  |  |  |  |  |
| chr2 | 44532045       | 44532045     | SNV          | C                             | C:T                                       | 1     |                                           | 0     |  |  |  |  |  |  |



Supplementary Table 1. Variants of SLC3A1 in the 1KG database

| Chr  | Start Position | End Position | Variant type | Ref Genotype   Ref Proteotype | Variant Genotype 1   Variant Proteotype 1 | Count | Variant Genotype 2   Variant Proteotype 2 | Count |  |  |  |  |  |  |
|------|----------------|--------------|--------------|-------------------------------|-------------------------------------------|-------|-------------------------------------------|-------|--|--|--|--|--|--|
| chr2 | 44536062       | 44536062     | SNV          | G                             | A:G                                       | 1     |                                           | 0     |  |  |  |  |  |  |
| chr2 | 44504888       | 44504888     | SNV          | C                             | C:T                                       | 1     |                                           | 0     |  |  |  |  |  |  |
| chr2 | 44520428       | 44520428     | SNV          | C                             | C:G                                       | 2     |                                           | 0     |  |  |  |  |  |  |
| chr2 | 44543700       | 44543700     | SNV          | T                             | C:T                                       | 1     |                                           | 0     |  |  |  |  |  |  |
| chr2 | 44538114       | 44538114     | SNV          | T                             | C:T                                       | 1     |                                           | 0     |  |  |  |  |  |  |
| chr2 | 44539178       | 44539178     | SNV          | T                             | G:T                                       | 1     |                                           | 0     |  |  |  |  |  |  |
| chr2 | 44508129       | 44508129     | SNV          | A                             | A:G                                       | 2     |                                           | 0     |  |  |  |  |  |  |
| chr2 | 44512717       | 44512717     | SNV          | A                             | A:G                                       | 1     |                                           | 0     |  |  |  |  |  |  |
| chr2 | 44507996       | 44507996     | SNV          | A E                           | A:G E:G                                   | 1     |                                           | 0     |  |  |  |  |  |  |
| chr2 | 44537807       | 44537807     | SNV          | A                             | A:C                                       | 1     |                                           | 0     |  |  |  |  |  |  |
| chr2 | 44513478       | 44513478     | SNV          | A                             | A:G                                       | 1     |                                           | 0     |  |  |  |  |  |  |
| chr2 | 44521337       | 44521337     | SNV          | T                             | C:T                                       | 1     |                                           | 0     |  |  |  |  |  |  |
| chr2 | 44531235       | 44531235     | SNV          | G                             | A:G                                       | 1     |                                           | 0     |  |  |  |  |  |  |
| chr2 | 44534330       | 44534330     | SNV          | T                             | C:T                                       | 1     |                                           | 0     |  |  |  |  |  |  |
| chr2 | 44519579       | 44519579     | SNV          | G                             | C:G                                       | 1     |                                           | 0     |  |  |  |  |  |  |
| chr2 | 44525000       | 44525000     | SNV          | T                             | C:T                                       | 1     |                                           | 0     |  |  |  |  |  |  |
| chr2 | 44544326       | 44544326     | SNV          | G                             | G:T                                       | 1     |                                           | 0     |  |  |  |  |  |  |
| chr2 | 44528788       | 44528788     | SNV          | G                             | A:G                                       | 1     |                                           | 0     |  |  |  |  |  |  |
| chr2 | 44530746       | 44530746     | SNV          | T                             | G:T                                       | 1     |                                           | 0     |  |  |  |  |  |  |
| chr2 | 44512693       | 44512693     | SNV          | A                             | A:G                                       | 1     |                                           | 0     |  |  |  |  |  |  |
| chr2 | 44547854       | 44547854     | SNV          | T                             | G:T                                       | 1     |                                           | 0     |  |  |  |  |  |  |
| chr2 | 44532317       | 44532317     | SNV          | C                             | C:G                                       | 1     |                                           | 0     |  |  |  |  |  |  |
| chr2 | 44515998       | 44515998     | SNV          | G                             | C:G                                       | 1     |                                           | 0     |  |  |  |  |  |  |
| chr2 | 44505112       | 44505112     | SNV          | A                             | A:T                                       | 1     |                                           | 0     |  |  |  |  |  |  |
| chr2 | 44535000       | 44535000     | SNV          | G                             | C:G                                       | 1     |                                           | 0     |  |  |  |  |  |  |
| chr2 | 44526630       | 44526630     | SNV          | C                             | C:T                                       | 1     |                                           | 0     |  |  |  |  |  |  |
| chr2 | 44535549       | 44535549     | SNV          | G                             | C:G                                       | 1     |                                           | 0     |  |  |  |  |  |  |
| chr2 | 44532265       | 44532265     | SNV          | C                             | C:T                                       | 1     |                                           | 0     |  |  |  |  |  |  |
| chr2 | 44506297       | 44506297     | SNV          | C                             | C:G                                       | 1     |                                           | 0     |  |  |  |  |  |  |
| chr2 | 44545290       | 44545290     | SNV          | C                             | C:T                                       | 1     |                                           | 0     |  |  |  |  |  |  |
| chr2 | 44514640       | 44514640     | SNV          | G                             | G:T                                       | 1     |                                           | 0     |  |  |  |  |  |  |
| chr2 | 44547258       | 44547258     | SNV          | A                             | A:G                                       | 1     |                                           | 0     |  |  |  |  |  |  |
| chr2 | 44524047       | 44524047     | SNV          | C                             | C:T                                       | 1     |                                           | 0     |  |  |  |  |  |  |
| chr2 | 44547222       | 44547222     | SNV          | A                             | A:G                                       | 1     |                                           | 0     |  |  |  |  |  |  |
| chr2 | 44507965       | 44507965     | SNV          | C R                           | C:T R:W                                   | 2     |                                           | 0     |  |  |  |  |  |  |
| chr2 | 44524947       | 44524947     | SNV          | G                             | A:G                                       | 4     |                                           | 0     |  |  |  |  |  |  |
| chr2 | 44544345       | 44544345     | SNV          | T                             | C:T                                       | 1     |                                           | 0     |  |  |  |  |  |  |
| chr2 | 44546039       | 44546039     | SNV          | A                             | A:G                                       | 1     |                                           | 0     |  |  |  |  |  |  |
| chr2 | 44543660       | 44543660     | SNV          | A                             | A:G                                       | 1     |                                           | 0     |  |  |  |  |  |  |
| chr2 | 44543412       | 44543412     | SNV          | A                             | A:T                                       | 1     |                                           | 0     |  |  |  |  |  |  |
| chr2 | 44520593       | 44520593     | SNV          | T                             | C:T                                       | 2     |                                           | 0     |  |  |  |  |  |  |
| chr2 | 44536737       | 44536737     | SNV          | C                             | C:T                                       | 1     |                                           | 0     |  |  |  |  |  |  |
| chr2 | 44511258       | 44511258     | SNV          | G                             | A:G                                       | 4     |                                           | 0     |  |  |  |  |  |  |
| chr2 | 44503113       | 44503113     | SNV          | C                             | C:T                                       | 1     |                                           | 0     |  |  |  |  |  |  |
| chr2 | 44509874       | 44509874     | SNV          | G                             | A:G                                       | 1     |                                           | 0     |  |  |  |  |  |  |
| chr2 | 44529890       | 44529890     | SNV          | A                             | A:G                                       | 1     |                                           | 0     |  |  |  |  |  |  |
| chr2 | 44525171       | 44525171     | SNV          | T                             | C:T                                       | 1     |                                           | 0     |  |  |  |  |  |  |
| chr2 | 44544019       | 44544019     | SNV          | A                             | A:G                                       | 1     |                                           | 0     |  |  |  |  |  |  |
| chr2 | 44534803       | 44534803     | SNV          | G                             | G:T                                       | 3     |                                           | 0     |  |  |  |  |  |  |
| chr2 | 44547135       | 44547135     | SNV          | A                             | A:G                                       | 1     |                                           | 0     |  |  |  |  |  |  |
| chr2 | 44537551       | 44537551     | SNV          | G                             | G:T                                       | 1     |                                           | 0     |  |  |  |  |  |  |
| chr2 | 44519513       | 44519513     | SNV          | G                             | A:G                                       | 2     |                                           | 0     |  |  |  |  |  |  |
| chr2 | 44513046       | 44513046     | SNV          | C                             | C:G                                       | 1     |                                           | 0     |  |  |  |  |  |  |
| chr2 | 44525375       | 44525375     | SNV          | C                             | C:G                                       | 2     |                                           | 0     |  |  |  |  |  |  |
| chr2 | 44510662       | 44510662     | SNV          | T                             | A:T                                       | 1     |                                           | 0     |  |  |  |  |  |  |
| chr2 | 44541133       | 44541133     | SNV          | A                             | A:G                                       | 1     |                                           | 0     |  |  |  |  |  |  |
| chr2 | 44515409       | 44515409     | SNV          | C                             | A:C                                       | 1     |                                           | 0     |  |  |  |  |  |  |
| chr2 | 44539264       | 44539264     | SNV          | A                             | A:G                                       | 1     |                                           | 0     |  |  |  |  |  |  |
| chr2 | 44534808       | 44534808     | SNV          | G                             | C:G                                       | 1     |                                           | 0     |  |  |  |  |  |  |
| chr2 | 44546958       | 44546958     | SNV          | G                             | A:G                                       | 1     |                                           | 0     |  |  |  |  |  |  |
| chr2 | 44532081       | 44532081     | SNV          | C                             | C:T                                       | 1     |                                           | 0     |  |  |  |  |  |  |
| chr2 | 44524498       | 44524498     | SNV          | T                             | A:T                                       | 1     |                                           | 0     |  |  |  |  |  |  |
| chr2 | 44508507       | 44508507     | SNV          | A                             | A:C                                       | 1     |                                           | 0     |  |  |  |  |  |  |
| chr2 | 44529593       | 44529593     | SNV          | C                             | C:T                                       | 10    |                                           | 0     |  |  |  |  |  |  |
| chr2 | 44508849       | 44508849     | SNV          | C                             | C:T                                       | 1     |                                           | 0     |  |  |  |  |  |  |
| chr2 | 44539685       | 44539685     | SNV          | T                             | C:T                                       | 1     |                                           | 0     |  |  |  |  |  |  |
| chr2 | 44521951       | 44521951     | SNV          | C                             | A:C                                       | 1     |                                           | 0     |  |  |  |  |  |  |
| chr2 | 44540141       | 44540141     | SNV          | C                             | T:T                                       | 1     |                                           | 0     |  |  |  |  |  |  |
| chr2 | 44524860       | 44524860     | SNV          | G                             | G:T                                       | 1     |                                           | 0     |  |  |  |  |  |  |
| chr2 | 44546566       | 44546566     | SNV          | A                             | A:G                                       | 1     |                                           | 0     |  |  |  |  |  |  |
| chr2 | 44545005       | 44545005     | SNV          | G                             | A:G                                       | 1     |                                           | 0     |  |  |  |  |  |  |
| chr2 | 44527082       | 44527082     | SNV          | A                             | A:G                                       | 2     |                                           | 0     |  |  |  |  |  |  |
| chr2 | 44536259       | 44536259     | SNV          | T                             | C:T                                       | 1     |                                           | 0     |  |  |  |  |  |  |
| chr2 | 44530872       | 44530872     | SNV          | C                             | C:T                                       | 1     |                                           | 0     |  |  |  |  |  |  |
| chr2 | 44520215       | 44520215     | SNV          | T                             | C:T                                       | 1     |                                           | 0     |  |  |  |  |  |  |
| chr2 | 44505235       | 44505235     | SNV          | G                             | G:T                                       | 1     |                                           | 0     |  |  |  |  |  |  |
| chr2 | 44519072       | 44519072     | SNV          | T                             | C:T                                       | 1     |                                           | 0     |  |  |  |  |  |  |
| chr2 | 44506075       | 44506075     | SNV          | G                             | A:G                                       | 1     |                                           | 0     |  |  |  |  |  |  |
| chr2 | 44518564       | 44518564     | SNV          | G                             | C:G                                       | 1     |                                           | 0     |  |  |  |  |  |  |
| chr2 | 44505918       | 44505918     | SNV          | C                             | A:C                                       | 1     |                                           | 0     |  |  |  |  |  |  |
| chr2 | 44527343       | 44527343     | SNV          | C                             | A:C                                       | 1     |                                           | 0     |  |  |  |  |  |  |
| chr2 | 44536039       | 44536039     | SNV          | C                             | A:C                                       | 1     |                                           | 0     |  |  |  |  |  |  |
| chr2 | 44507597       | 44507597     | SNV          | C                             | C:T                                       | 1     |                                           | 0     |  |  |  |  |  |  |
| chr2 | 44540965       | 44540965     | SNV          | T                             | C:T                                       | 1     |                                           | 0     |  |  |  |  |  |  |
| chr2 | 44524023       | 44524023     | SNV          | A                             | A:C                                       | 1     |                                           | 0     |  |  |  |  |  |  |
| chr2 | 44526034       | 44526034     | SNV          | T                             | A:T                                       | 1     |                                           | 0     |  |  |  |  |  |  |
| chr2 | 44518058       | 44518058     | SNV          | C                             | C:T                                       | 1     |                                           | 0     |  |  |  |  |  |  |
| chr2 | 44510779       | 44510779     | SNV          | C                             | C:T                                       | 1     |                                           | 0     |  |  |  |  |  |  |
| chr2 | 44502640       | 44502640     | SNV          | C                             | C:T                                       | 1     |                                           | 0     |  |  |  |  |  |  |
| chr2 | 44543731       | 44543731     | SNV          | A                             | A:G                                       | 1     |                                           | 0     |  |  |  |  |  |  |
| chr2 | 44540534       | 44540534     | SNV          | C                             | A:C                                       | 1     |                                           | 0     |  |  |  |  |  |  |
| chr2 | 44511280       | 44511280     | SNV          | G                             | A:G                                       | 1     |                                           | 0     |  |  |  |  |  |  |
| chr2 | 44508587       | 44508587     | SNV          | A Q                           | A:G Q:Q                                   | 7     |                                           | 0     |  |  |  |  |  |  |
| chr2 | 44502675       | 44502675     | SNV          | A M                           | A:G M:V                                   | 1     |                                           | 0     |  |  |  |  |  |  |

Supplementary Table 1. Variants of SLC3A1 in the 1KG database

| Chr  | Start Position | End Position | Variant type | Ref Genotype   Ref Proteotype | Variant Genotype 1   Variant Proteotype 1 | Count | Variant Genotype 2   Variant Proteotype 2 | Count |  |  |  |  |  |  |
|------|----------------|--------------|--------------|-------------------------------|-------------------------------------------|-------|-------------------------------------------|-------|--|--|--|--|--|--|
| chr2 | 44531908       | 44531908     | SNV          | G                             | A:G                                       | 1     |                                           | 0     |  |  |  |  |  |  |
| chr2 | 44532650       | 44532650     | SNV          | T                             | G:T                                       | 1     |                                           | 0     |  |  |  |  |  |  |
| chr2 | 44524062       | 44524062     | SNV          | A                             | A:G                                       | 1     |                                           | 0     |  |  |  |  |  |  |
| chr2 | 44506498       | 44506498     | SNV          | C                             | C:G                                       | 2     |                                           | 0     |  |  |  |  |  |  |
| chr2 | 44530771       | 44530771     | SNV          | C                             | C:T                                       | 2     |                                           | 0     |  |  |  |  |  |  |
| chr2 | 44543476       | 44543476     | SNV          | G                             | A:G                                       | 2     |                                           | 0     |  |  |  |  |  |  |
| chr2 | 44504671       | 44504671     | SNV          | C                             | C:T                                       | 8     |                                           | 0     |  |  |  |  |  |  |
| chr2 | 44536170       | 44536170     | SNV          | C                             | C:G                                       | 1     |                                           | 0     |  |  |  |  |  |  |
| chr2 | 44518577       | 44518577     | SNV          | A                             | A:T                                       | 7     |                                           | 0     |  |  |  |  |  |  |
| chr2 | 44539297       | 44539297     | SNV          | T                             | G:T                                       | 1     |                                           | 0     |  |  |  |  |  |  |
| chr2 | 44527613       | 44527613     | SNV          | T                             | G:T                                       | 1     |                                           | 0     |  |  |  |  |  |  |
| chr2 | 44533351       | 44533351     | SNV          | C                             | C:G                                       | 1     |                                           | 0     |  |  |  |  |  |  |
| chr2 | 44537195       | 44537195     | SNV          | G                             | A:G                                       | 1     |                                           | 0     |  |  |  |  |  |  |
| chr2 | 44535640       | 44535640     | SNV          | T                             | C:T                                       | 1     |                                           | 0     |  |  |  |  |  |  |
| chr2 | 44537784       | 44537784     | SNV          | T                             | G:T                                       | 1     |                                           | 0     |  |  |  |  |  |  |
| chr2 | 44543484       | 44543484     | SNV          | C                             | C:T                                       | 1     |                                           | 0     |  |  |  |  |  |  |
| chr2 | 44520227       | 44520227     | SNV          | G                             | A:G                                       | 1     |                                           | 0     |  |  |  |  |  |  |
| chr2 | 44512857       | 44512857     | SNV          | A                             | A:C                                       | 1     |                                           | 0     |  |  |  |  |  |  |
| chr2 | 44513589       | 44513589     | SNV          | T                             | C:T                                       | 1     |                                           | 0     |  |  |  |  |  |  |
| chr2 | 44530734       | 44530734     | SNV          | T                             | C:T                                       | 1     |                                           | 0     |  |  |  |  |  |  |
| chr2 | 44524406       | 44524406     | SNV          | T                             | C:T                                       | 1     |                                           | 0     |  |  |  |  |  |  |
| chr2 | 44502949       | 44502949     | SNV          | T L                           | C:T P:L                                   | 1     |                                           | 0     |  |  |  |  |  |  |
| chr2 | 44510787       | 44510787     | SNV          | C                             | C:T                                       | 1     |                                           | 0     |  |  |  |  |  |  |
| chr2 | 44524035       | 44524035     | SNV          | T                             | G:T                                       | 1     |                                           | 0     |  |  |  |  |  |  |
| chr2 | 44535965       | 44535965     | SNV          | G                             | G:T                                       | 1     |                                           | 0     |  |  |  |  |  |  |
| chr2 | 44530267       | 44530267     | SNV          | G                             | G:T                                       | 3     |                                           | 0     |  |  |  |  |  |  |
| chr2 | 44526548       | 44526548     | SNV          | C                             | C:G                                       | 1     |                                           | 0     |  |  |  |  |  |  |
| chr2 | 44542224       | 44542224     | SNV          | G                             | G:T                                       | 1     |                                           | 0     |  |  |  |  |  |  |
| chr2 | 44516997       | 44516997     | SNV          | T                             | G:T                                       | 1     |                                           | 0     |  |  |  |  |  |  |
| chr2 | 44508552       | 44508552     | SNV          | C P                           | C:G P:A                                   | 1     |                                           | 0     |  |  |  |  |  |  |
| chr2 | 44527132       | 44527132     | SNV          | C T                           | A:C K:T                                   | 1     |                                           | 0     |  |  |  |  |  |  |
| chr2 | 44525153       | 44525153     | SNV          | T                             | C:T                                       | 1     |                                           | 0     |  |  |  |  |  |  |
| chr2 | 44524092       | 44524092     | SNV          | C                             | C:T                                       | 1     |                                           | 0     |  |  |  |  |  |  |
| chr2 | 44531211       | 44531211     | SNV          | A                             | A:G                                       | 1     |                                           | 0     |  |  |  |  |  |  |
| chr2 | 44513352       | 44513352     | SNV          | T                             | C:T                                       | 2     |                                           | 0     |  |  |  |  |  |  |
| chr2 | 44529098       | 44529098     | SNV          | G                             | A:G                                       | 1     |                                           | 0     |  |  |  |  |  |  |
| chr2 | 44531547       | 44531547     | SNV          | G                             | C:G                                       | 1     |                                           | 0     |  |  |  |  |  |  |
| chr2 | 44544639       | 44544639     | SNV          | C                             | A:C                                       | 1     |                                           | 0     |  |  |  |  |  |  |
| chr2 | 44504405       | 44504405     | SNV          | C                             | A:C                                       | 1     |                                           | 0     |  |  |  |  |  |  |
| chr2 | 44513397       | 44513397     | SNV          | C                             | C:T                                       | 1     |                                           | 0     |  |  |  |  |  |  |
| chr2 | 44527743       | 44527743     | SNV          | G                             | G:T                                       | 1     |                                           | 0     |  |  |  |  |  |  |
| chr2 | 44528288       | 44528288     | SNV          | C                             | C:T                                       | 1     |                                           | 0     |  |  |  |  |  |  |
| chr2 | 44509259       | 44509259     | SNV          | C                             | A:C                                       | 1     |                                           | 0     |  |  |  |  |  |  |
| chr2 | 44519297       | 44519297     | SNV          | G                             | C:G                                       | 1     |                                           | 0     |  |  |  |  |  |  |
| chr2 | 44525908       | 44525908     | SNV          | C                             | C:T                                       | 1     |                                           | 0     |  |  |  |  |  |  |
| chr2 | 44528032       | 44528032     | SNV          | C                             | C:T                                       | 1     |                                           | 0     |  |  |  |  |  |  |
| chr2 | 44505604       | 44505604     | SNV          | T                             | C:T                                       | 1     |                                           | 0     |  |  |  |  |  |  |
| chr2 | 44514373       | 44514373     | SNV          | C                             | C:T                                       | 1     |                                           | 0     |  |  |  |  |  |  |
| chr2 | 44533230       | 44533230     | SNV          | G                             | C:G                                       | 1     |                                           | 0     |  |  |  |  |  |  |
| chr2 | 44522781       | 44522781     | SNV          | T                             | C:T                                       | 1     |                                           | 0     |  |  |  |  |  |  |
| chr2 | 44540926       | 44540926     | SNV          | C                             | C:T                                       | 1     |                                           | 0     |  |  |  |  |  |  |
| chr2 | 44516347       | 44516347     | SNV          | T                             | C:T                                       | 1     |                                           | 0     |  |  |  |  |  |  |
| chr2 | 44532056       | 44532056     | SNV          | G                             | G:T                                       | 2     |                                           | 0     |  |  |  |  |  |  |
| chr2 | 44510082       | 44510082     | SNV          | C                             | C:T                                       | 1     |                                           | 0     |  |  |  |  |  |  |
| chr2 | 44546905       | 44546905     | SNV          | C                             | C:T                                       | 1     |                                           | 0     |  |  |  |  |  |  |
| chr2 | 44521251       | 44521251     | SNV          | C                             | A:C                                       | 1     |                                           | 0     |  |  |  |  |  |  |
| chr2 | 44508601       | 44508601     | SNV          | G R                           | A:G Q:R                                   | 2     |                                           | 0     |  |  |  |  |  |  |
| chr2 | 44543271       | 44543271     | SNV          | C                             | C:T                                       | 1     |                                           | 0     |  |  |  |  |  |  |
| chr2 | 44505088       | 44505088     | SNV          | T                             | C:T                                       | 1     |                                           | 0     |  |  |  |  |  |  |
| chr2 | 44527730       | 44527730     | SNV          | T                             | C:T                                       | 3     |                                           | 0     |  |  |  |  |  |  |
| chr2 | 44531414       | 44531414     | SNV          | C S                           | C:T S:S                                   | 2     |                                           | 0     |  |  |  |  |  |  |
| chr2 | 44532284       | 44532284     | insertion    | -                             | -:C                                       | 4     |                                           | 0     |  |  |  |  |  |  |
| chr2 | 44514206       | 44514206     | SNV          | C                             | C:T                                       | 1     |                                           | 0     |  |  |  |  |  |  |
| chr2 | 44510169       | 44510169     | SNV          | C                             | A:C                                       | 1     |                                           | 0     |  |  |  |  |  |  |
| chr2 | 44504588       | 44504588     | SNV          | T                             | G:T                                       | 8     |                                           | 0     |  |  |  |  |  |  |
| chr2 | 44535106       | 44535106     | SNV          | C                             | C:G                                       | 2     |                                           | 0     |  |  |  |  |  |  |
| chr2 | 44515787       | 44515787     | SNV          | A                             | A:G                                       | 1     |                                           | 0     |  |  |  |  |  |  |
| chr2 | 44545390       | 44545390     | SNV          | C                             | C:G                                       | 1     |                                           | 0     |  |  |  |  |  |  |
| chr2 | 44513106       | 44513106     | SNV          | A                             | A:C                                       | 2     |                                           | 0     |  |  |  |  |  |  |
| chr2 | 44541699       | 44541699     | SNV          | G                             | A:G                                       | 1     |                                           | 0     |  |  |  |  |  |  |
| chr2 | 44547092       | 44547092     | SNV          | T                             | A:T                                       | 1     |                                           | 0     |  |  |  |  |  |  |
| chr2 | 44515442       | 44515442     | SNV          | G                             | G:T                                       | 1     |                                           | 0     |  |  |  |  |  |  |
| chr2 | 44513989       | 44513989     | SNV          | C                             | C:T                                       | 1     |                                           | 0     |  |  |  |  |  |  |
| chr2 | 44528761       | 44528761     | SNV          | C                             | C:G                                       | 1     |                                           | 0     |  |  |  |  |  |  |
| chr2 | 44536016       | 44536016     | SNV          | T                             | C:T                                       | 1     |                                           | 0     |  |  |  |  |  |  |
| chr2 | 44539970       | 44539970     | SNV          | A                             | A:C                                       | 2     |                                           | 0     |  |  |  |  |  |  |
| chr2 | 44521487       | 44521487     | SNV          | T                             | C:T                                       | 2     |                                           | 0     |  |  |  |  |  |  |
| chr2 | 44541327       | 44541327     | SNV          | T                             | C:T                                       | 3     |                                           | 0     |  |  |  |  |  |  |
| chr2 | 44543394       | 44543394     | SNV          | C                             | C:T                                       | 1     |                                           | 0     |  |  |  |  |  |  |
| chr2 | 44547673       | 44547673     | SNV          | C N                           | C:T N:N                                   | 1     |                                           | 0     |  |  |  |  |  |  |
| chr2 | 44536300       | 44536300     | SNV          | T                             | G:T                                       | 1     |                                           | 0     |  |  |  |  |  |  |
| chr2 | 44520530       | 44520530     | SNV          | C                             | A:C                                       | 1     |                                           | 0     |  |  |  |  |  |  |
| chr2 | 44512835       | 44512835     | SNV          | C                             | C:G                                       | 2     |                                           | 0     |  |  |  |  |  |  |
| chr2 | 44537841       | 44537841     | SNV          | T                             | A:T                                       | 1     |                                           | 0     |  |  |  |  |  |  |
| chr2 | 44528661       | 44528661     | SNV          | C                             | C:T                                       | 1     |                                           | 0     |  |  |  |  |  |  |
| chr2 | 44509355       | 44509355     | SNV          | C                             | C:G                                       | 1     |                                           | 0     |  |  |  |  |  |  |
| chr2 | 44522908       | 44522908     | SNV          | A                             | A:C                                       | 1     |                                           | 0     |  |  |  |  |  |  |
| chr2 | 44525008       | 44525008     | SNV          | A                             | A:G                                       | 1     |                                           | 0     |  |  |  |  |  |  |
| chr2 | 44511541       | 44511541     | SNV          | T                             | C:T                                       | 1     |                                           | 0     |  |  |  |  |  |  |
| chr2 | 44506939       | 44506939     | SNV          | C                             | A:C                                       | 1     |                                           | 0     |  |  |  |  |  |  |
| chr2 | 44530736       | 44530736     | SNV          | A                             | A:T                                       | 1     |                                           | 0     |  |  |  |  |  |  |
| chr2 | 44508585       | 44508585     | SNV          | C Q                           | C:T Q:*                                   | 1     |                                           | 0     |  |  |  |  |  |  |
| chr2 | 44524862       | 44524862     | SNV          | G                             | A:G                                       | 1     |                                           | 0     |  |  |  |  |  |  |
| chr2 | 44527855       | 44527855     | SNV          | A                             | A:T                                       | 1     |                                           | 0     |  |  |  |  |  |  |



Supplementary Table 1. Variants of SLC3A1 in the 1KG database

| Chr  | Start Position | End Position | Variant type | Ref Genotype   Ref Proteotype | Variant Genotype 1   Variant Proteotype 1 | Count | Variant Genotype 2   Variant Proteotype 2 | Count |  |  |  |  |  |  |  |
|------|----------------|--------------|--------------|-------------------------------|-------------------------------------------|-------|-------------------------------------------|-------|--|--|--|--|--|--|--|
| chr2 | 44538246       | 44538246     | SNV          | T                             | G:T                                       | 7     |                                           | 0     |  |  |  |  |  |  |  |
| chr2 | 44522582       | 44522582     | SNV          | G                             | C:G                                       | 3     |                                           | 0     |  |  |  |  |  |  |  |
| chr2 | 44539086       | 44539086     | SNV          | C                             | C:T                                       | 1     |                                           | 0     |  |  |  |  |  |  |  |
| chr2 | 44544659       | 44544659     | SNV          | C                             | C:T                                       | 1     |                                           | 0     |  |  |  |  |  |  |  |
| chr2 | 44526890       | 44526890     | SNV          | T                             | A:T                                       | 1     |                                           | 0     |  |  |  |  |  |  |  |
| chr2 | 44507747       | 44507747     | SNV          | A                             | A:G                                       | 1     |                                           | 0     |  |  |  |  |  |  |  |
| chr2 | 44524330       | 44524330     | SNV          | C                             | C:T                                       | 1     |                                           | 0     |  |  |  |  |  |  |  |
| chr2 | 44534008       | 44534008     | SNV          | T                             | C:T                                       | 1     |                                           | 0     |  |  |  |  |  |  |  |
| chr2 | 44521009       | 44521009     | SNV          | C                             | C:G                                       | 1     |                                           | 0     |  |  |  |  |  |  |  |
| chr2 | 44543990       | 44543990     | SNV          | C                             | C:T                                       | 1     |                                           | 0     |  |  |  |  |  |  |  |
| chr2 | 44512484       | 44512484     | SNV          | T                             | C:T                                       | 1     |                                           | 0     |  |  |  |  |  |  |  |
| chr2 | 44529961       | 44529961     | SNV          | A                             | A:C                                       | 6     |                                           | 0     |  |  |  |  |  |  |  |
| chr2 | 44533284       | 44533284     | SNV          | A                             | A:T                                       | 1     |                                           | 0     |  |  |  |  |  |  |  |
| chr2 | 44529373       | 44529373     | SNV          | C                             | C:T                                       | 2     |                                           | 0     |  |  |  |  |  |  |  |
| chr2 | 44543783       | 44543783     | SNV          | A                             | A:G                                       | 1     |                                           | 0     |  |  |  |  |  |  |  |
| chr2 | 44518106       | 44518106     | SNV          | T                             | G:T                                       | 1     |                                           | 0     |  |  |  |  |  |  |  |
| chr2 | 44503135       | 44503135     | SNV          | G                             | G:T                                       | 1     |                                           | 0     |  |  |  |  |  |  |  |
| chr2 | 44529827       | 44529827     | SNV          | C                             | A:C                                       | 1     |                                           | 0     |  |  |  |  |  |  |  |
| chr2 | 44505712       | 44505712     | SNV          | C                             | C:T                                       | 1     |                                           | 0     |  |  |  |  |  |  |  |
| chr2 | 44527119       | 44527119     | SNV          | C R                           | C:T R:W                                   | 1     |                                           | 0     |  |  |  |  |  |  |  |
| chr2 | 44508259       | 44508259     | SNV          | C                             | C:G                                       | 1     |                                           | 0     |  |  |  |  |  |  |  |
| chr2 | 44509734       | 44509734     | SNV          | A                             | A:C                                       | 1     |                                           | 0     |  |  |  |  |  |  |  |
| chr2 | 44532152       | 44532152     | SNV          | T                             | C:T                                       | 1     |                                           | 0     |  |  |  |  |  |  |  |
| chr2 | 44542362       | 44542362     | SNV          | G                             | G:T                                       | 3     |                                           | 0     |  |  |  |  |  |  |  |
| chr2 | 44524051       | 44524051     | SNV          | C                             | C:T                                       | 1     |                                           | 0     |  |  |  |  |  |  |  |
| chr2 | 44505448       | 44505448     | SNV          | G                             | A:G                                       | 1     |                                           | 0     |  |  |  |  |  |  |  |
| chr2 | 44533344       | 44533344     | SNV          | T                             | C:T                                       | 2     |                                           | 0     |  |  |  |  |  |  |  |
| chr2 | 44519340       | 44519340     | SNV          | C                             | C:T                                       | 2     |                                           | 0     |  |  |  |  |  |  |  |
| chr2 | 44506291       | 44506291     | SNV          | T                             | C:T                                       | 1     |                                           | 0     |  |  |  |  |  |  |  |
| chr2 | 44545466       | 44545466     | SNV          | G                             | A:G                                       | 1     |                                           | 0     |  |  |  |  |  |  |  |
| chr2 | 44533895       | 44533895     | SNV          | C                             | C:T                                       | 1     |                                           | 0     |  |  |  |  |  |  |  |
| chr2 | 44530724       | 44530724     | SNV          | T                             | A:T                                       | 2     |                                           | 0     |  |  |  |  |  |  |  |
| chr2 | 44516457       | 44516457     | SNV          | C                             | C:T                                       | 1     |                                           | 0     |  |  |  |  |  |  |  |
| chr2 | 44530966       | 44530966     | SNV          | G                             | A:G                                       | 1     |                                           | 0     |  |  |  |  |  |  |  |
| chr2 | 44525113       | 44525113     | SNV          | C                             | C:T                                       | 1     |                                           | 0     |  |  |  |  |  |  |  |
| chr2 | 44537753       | 44537753     | SNV          | A                             | A:G                                       | 1     |                                           | 0     |  |  |  |  |  |  |  |
| chr2 | 44524739       | 44524739     | SNV          | C                             | C:T                                       | 1     |                                           | 0     |  |  |  |  |  |  |  |
| chr2 | 44538441       | 44538441     | SNV          | C                             | A:C                                       | 1     |                                           | 0     |  |  |  |  |  |  |  |
| chr2 | 44533226       | 44533228     | deletion     | TGT                           | -:TGT                                     | 4     |                                           | 0     |  |  |  |  |  |  |  |
| chr2 | 44534623       | 44534623     | SNV          | C                             | C:T                                       | 1     |                                           | 0     |  |  |  |  |  |  |  |
| chr2 | 44507968       | 44507968     | SNV          | G E                           | A:G K:E                                   | 2     |                                           | 0     |  |  |  |  |  |  |  |
| chr2 | 44536251       | 44536251     | SNV          | G                             | A:G                                       | 1     |                                           | 0     |  |  |  |  |  |  |  |
| chr2 | 44531804       | 44531804     | SNV          | G                             | A:G                                       | 1     |                                           | 0     |  |  |  |  |  |  |  |
| chr2 | 44536397       | 44536397     | SNV          | C                             | C:T                                       | 1     |                                           | 0     |  |  |  |  |  |  |  |
| chr2 | 44539746       | 44539746     | SNV          | C R                           | C:T R:W                                   | 1     |                                           | 0     |  |  |  |  |  |  |  |
| chr2 | 44526579       | 44526579     | SNV          | G                             | C:G                                       | 1     |                                           | 0     |  |  |  |  |  |  |  |
| chr2 | 44514016       | 44514016     | SNV          | G                             | A:G                                       | 1     |                                           | 0     |  |  |  |  |  |  |  |
| chr2 | 44538063       | 44538063     | SNV          | A                             | A:G                                       | 1     |                                           | 0     |  |  |  |  |  |  |  |
| chr2 | 44543173       | 44543173     | SNV          | A                             | A:G                                       | 1     |                                           | 0     |  |  |  |  |  |  |  |
| chr2 | 44531496       | 44531496     | SNV          | A                             | A:G                                       | 1     |                                           | 0     |  |  |  |  |  |  |  |
| chr2 | 44539110       | 44539110     | SNV          | G                             | C:G                                       | 1     |                                           | 0     |  |  |  |  |  |  |  |
| chr2 | 44506513       | 44506513     | SNV          | C                             | C:T                                       | 2     |                                           | 0     |  |  |  |  |  |  |  |
| chr2 | 44547694       | 44547694     | SNV          | C R                           | A:C R:R                                   | 1     |                                           | 0     |  |  |  |  |  |  |  |
| chr2 | 44520345       | 44520345     | SNV          | G                             | G:T                                       | 1     |                                           | 0     |  |  |  |  |  |  |  |
| chr2 | 44526618       | 44526618     | SNV          | C                             | A:C                                       | 2     |                                           | 0     |  |  |  |  |  |  |  |
| chr2 | 44519574       | 44519574     | SNV          | G                             | A:G                                       | 1     |                                           | 0     |  |  |  |  |  |  |  |
| chr2 | 44543391       | 44543391     | SNV          | T                             | C:T                                       | 1     |                                           | 0     |  |  |  |  |  |  |  |
| chr2 | 44523462       | 44523462     | SNV          | A                             | A:C                                       | 3     |                                           | 0     |  |  |  |  |  |  |  |
| chr2 | 44513917       | 44513917     | SNV          | C                             | C:T                                       | 1     |                                           | 0     |  |  |  |  |  |  |  |
| chr2 | 44545557       | 44545557     | SNV          | C                             | A:C                                       | 1     |                                           | 0     |  |  |  |  |  |  |  |
| chr2 | 44532504       | 44532504     | SNV          | T                             | C:T                                       | 1     |                                           | 0     |  |  |  |  |  |  |  |
| chr2 | 44509983       | 44509983     | SNV          | G                             | A:G                                       | 1     |                                           | 0     |  |  |  |  |  |  |  |
| chr2 | 44502979       | 44502979     | SNV          | C A                           | C:T A:V                                   | 2     |                                           | 0     |  |  |  |  |  |  |  |
| chr2 | 44507992       | 44507992     | SNV          | A M                           | A:G M:V                                   | 1     |                                           | 0     |  |  |  |  |  |  |  |
| chr2 | 44538339       | 44538339     | SNV          | C                             | C:T                                       | 1     |                                           | 0     |  |  |  |  |  |  |  |
| chr2 | 44504996       | 44504996     | SNV          | A                             | A:C                                       | 1     |                                           | 0     |  |  |  |  |  |  |  |
| chr2 | 44527532       | 44527532     | SNV          | A                             | A:C                                       | 2     |                                           | 0     |  |  |  |  |  |  |  |
| chr2 | 44540730       | 44540730     | SNV          | G                             | A:G                                       | 1     |                                           | 0     |  |  |  |  |  |  |  |
| chr2 | 44528454       | 44528454     | SNV          | T                             | G:T                                       | 1     |                                           | 0     |  |  |  |  |  |  |  |
| chr2 | 44514743       | 44514743     | SNV          | C                             | C:T                                       | 2     |                                           | 0     |  |  |  |  |  |  |  |
| chr2 | 44530166       | 44530166     | SNV          | T                             | C:T                                       | 1     |                                           | 0     |  |  |  |  |  |  |  |
| chr2 | 44509913       | 44509913     | SNV          | A                             | A:T                                       | 1     |                                           | 0     |  |  |  |  |  |  |  |
| chr2 | 44522637       | 44522637     | SNV          | A                             | A:G                                       | 1     |                                           | 0     |  |  |  |  |  |  |  |
| chr2 | 44533919       | 44533919     | SNV          | C                             | C:T                                       | 2     |                                           | 0     |  |  |  |  |  |  |  |
| chr2 | 44547488       | 44547488     | SNV          | G D                           | A:G N:D                                   | 2     |                                           | 0     |  |  |  |  |  |  |  |
| chr2 | 44518308       | 44518308     | SNV          | C                             | C:G                                       | 2     |                                           | 0     |  |  |  |  |  |  |  |
| chr2 | 44534956       | 44534956     | SNV          | A                             | A:G                                       | 2     |                                           | 0     |  |  |  |  |  |  |  |
| chr2 | 44522886       | 44522886     | SNV          | T                             | A:T                                       | 2     |                                           | 0     |  |  |  |  |  |  |  |
| chr2 | 44526785       | 44526785     | SNV          | C                             | A:C                                       | 1     |                                           | 0     |  |  |  |  |  |  |  |
| chr2 | 44503833       | 44503833     | SNV          | G                             | A:G                                       | 1     |                                           | 0     |  |  |  |  |  |  |  |
| chr2 | 44519250       | 44519250     | SNV          | T                             | C:T                                       | 1     |                                           | 0     |  |  |  |  |  |  |  |
| chr2 | 44521477       | 44521477     | SNV          | C                             | G:G                                       | 1     | C:G                                       | 2     |  |  |  |  |  |  |  |
| chr2 | 44521213       | 44521213     | SNV          | A                             | A:G                                       | 1     |                                           | 0     |  |  |  |  |  |  |  |
| chr2 | 44506469       | 44506469     | SNV          | A                             | A:G                                       | 1     |                                           | 0     |  |  |  |  |  |  |  |
| chr2 | 44533391       | 44533391     | SNV          | C                             | A:C                                       | 4     |                                           | 0     |  |  |  |  |  |  |  |
| chr2 | 44506692       | 44506692     | SNV          | C                             | C:T                                       | 1     |                                           | 0     |  |  |  |  |  |  |  |
| chr2 | 44528680       | 44528680     | SNV          | C                             | A:C                                       | 1     |                                           | 0     |  |  |  |  |  |  |  |
| chr2 | 44533825       | 44533825     | SNV          | T                             | C:T                                       | 1     |                                           | 0     |  |  |  |  |  |  |  |
| chr2 | 44538248       | 44538248     | SNV          | C                             | C:G                                       | 1     |                                           | 0     |  |  |  |  |  |  |  |
| chr2 | 44547560       | 44547560     | SNV          | C L                           | A:C  L                                    | 1     |                                           | 0     |  |  |  |  |  |  |  |
| chr2 | 44545851       | 44545851     | SNV          | C                             | C:T                                       | 1     |                                           | 0     |  |  |  |  |  |  |  |
| chr2 | 44535585       | 44535585     | SNV          | G                             | C:G                                       | 1     |                                           | 0     |  |  |  |  |  |  |  |
| chr2 | 44543698       | 44543698     | SNV          | C                             | C:T                                       | 3     |                                           | 0     |  |  |  |  |  |  |  |
| chr2 | 44533493       | 44533493     | SNV          | C                             | C:T                                       | 1     |                                           | 0     |  |  |  |  |  |  |  |

Supplementary Table 1. Variants of SLC3A1 in the 1KG database

| Chr  | Start Position | End Position | Variant type | Ref Genotype   Ref Proteotype | Variant Genotype 1   Variant Proteotype 1 | Count | Variant Genotype 2   Variant Proteotype 2 | Count |  |  |  |  |  |  |  |
|------|----------------|--------------|--------------|-------------------------------|-------------------------------------------|-------|-------------------------------------------|-------|--|--|--|--|--|--|--|
| chr2 | 44542787       | 44542787     | SNV          | C                             | C:T                                       | 1     |                                           | 0     |  |  |  |  |  |  |  |
| chr2 | 44510617       | 44510617     | SNV          | G                             | A:G                                       | 1     |                                           | 0     |  |  |  |  |  |  |  |
| chr2 | 44511631       | 44511631     | SNV          | C                             | C:T                                       | 1     |                                           | 0     |  |  |  |  |  |  |  |
| chr2 | 44540400       | 44540400     | SNV          | C                             | C:T                                       | 1     |                                           | 0     |  |  |  |  |  |  |  |
| chr2 | 44515819       | 44515819     | SNV          | A                             | A:G                                       | 1     |                                           | 0     |  |  |  |  |  |  |  |
| chr2 | 44547762       | 44547762     | SNV          | T L                           | C:T P:L                                   | 1     |                                           | 0     |  |  |  |  |  |  |  |
| chr2 | 44541558       | 44541558     | SNV          | T                             | C:T                                       | 1     |                                           | 0     |  |  |  |  |  |  |  |
| chr2 | 44503057       | 44503057     | SNV          | C P                           | C:T P:L                                   | 1     |                                           | 0     |  |  |  |  |  |  |  |
| chr2 | 44531198       | 44531198     | SNV          | G                             | C:G                                       | 1     |                                           | 0     |  |  |  |  |  |  |  |
| chr2 | 44528224       | 44528224     | SNV          | G R                           | A:G Q:R                                   | 1     |                                           | 0     |  |  |  |  |  |  |  |
| chr2 | 44546510       | 44546510     | SNV          | T                             | C:T                                       | 1     |                                           | 0     |  |  |  |  |  |  |  |
| chr2 | 44503469       | 44503469     | SNV          | G                             | A:G                                       | 1     |                                           | 0     |  |  |  |  |  |  |  |
| chr2 | 44506261       | 44506261     | SNV          | C                             | C:T                                       | 1     |                                           | 0     |  |  |  |  |  |  |  |
| chr2 | 44534654       | 44534654     | SNV          | C                             | C:T                                       | 1     |                                           | 0     |  |  |  |  |  |  |  |
| chr2 | 44505234       | 44505234     | SNV          | C                             | C:T                                       | 2     |                                           | 0     |  |  |  |  |  |  |  |
| chr2 | 44518685       | 44518685     | SNV          | T                             | G:T                                       | 1     |                                           | 0     |  |  |  |  |  |  |  |
| chr2 | 44505528       | 44505528     | SNV          | A                             | A:G                                       | 2     |                                           | 0     |  |  |  |  |  |  |  |
| chr2 | 44534771       | 44534771     | SNV          | G                             | G:T                                       | 1     |                                           | 0     |  |  |  |  |  |  |  |
| chr2 | 44519299       | 44519299     | SNV          | G                             | A:G                                       | 1     |                                           | 0     |  |  |  |  |  |  |  |
| chr2 | 44517786       | 44517786     | SNV          | G                             | A:G                                       | 1     |                                           | 0     |  |  |  |  |  |  |  |
| chr2 | 44532027       | 44532027     | SNV          | C                             | C:T                                       | 1     |                                           | 0     |  |  |  |  |  |  |  |
| chr2 | 44540459       | 44540459     | SNV          | G                             | C:G                                       | 2     |                                           | 0     |  |  |  |  |  |  |  |
| chr2 | 44530442       | 44530442     | SNV          | G                             | A:G                                       | 1     |                                           | 0     |  |  |  |  |  |  |  |
| chr2 | 44531141       | 44531141     | SNV          | T                             | C:T                                       | 1     |                                           | 0     |  |  |  |  |  |  |  |
| chr2 | 44539757       | 44539757     | SNV          | G S                           | A:G S:S                                   | 1     |                                           | 0     |  |  |  |  |  |  |  |
| chr2 | 44540074       | 44540074     | SNV          | T                             | C:T                                       | 1     |                                           | 0     |  |  |  |  |  |  |  |
| chr2 | 44544935       | 44544935     | SNV          | A                             | A:T                                       | 1     |                                           | 0     |  |  |  |  |  |  |  |
| chr2 | 44540618       | 44540618     | SNV          | G                             | G:T                                       | 1     |                                           | 0     |  |  |  |  |  |  |  |
| chr2 | 44504076       | 44504076     | SNV          | A                             | A:G                                       | 2     |                                           | 0     |  |  |  |  |  |  |  |
| chr2 | 44504757       | 44504757     | SNV          | T                             | C:T                                       | 1     |                                           | 0     |  |  |  |  |  |  |  |
| chr2 | 44526287       | 44526287     | SNV          | C                             | C:T                                       | 2     |                                           | 0     |  |  |  |  |  |  |  |
| chr2 | 44528519       | 44528519     | SNV          | T                             | G:T                                       | 1     |                                           | 0     |  |  |  |  |  |  |  |
| chr2 | 44531294       | 44531294     | SNV          | T T                           | C:T T:T                                   | 4     |                                           | 0     |  |  |  |  |  |  |  |
| chr2 | 44510041       | 44510041     | SNV          | C                             | C:T                                       | 1     |                                           | 0     |  |  |  |  |  |  |  |
| chr2 | 44531085       | 44531085     | SNV          | T                             | C:T                                       | 1     |                                           | 0     |  |  |  |  |  |  |  |
| chr2 | 44515269       | 44515269     | SNV          | C                             | C:T                                       | 1     |                                           | 0     |  |  |  |  |  |  |  |
| chr2 | 44514677       | 44514677     | SNV          | A                             | A:T                                       | 1     |                                           | 0     |  |  |  |  |  |  |  |
| chr2 | 44524895       | 44524895     | SNV          | C                             | C:T                                       | 1     |                                           | 0     |  |  |  |  |  |  |  |
| chr2 | 44504874       | 44504874     | SNV          | T                             | G:T                                       | 2     |                                           | 0     |  |  |  |  |  |  |  |
| chr2 | 44542683       | 44542683     | SNV          | T                             | G:T                                       | 1     |                                           | 0     |  |  |  |  |  |  |  |
| chr2 | 44528326       | 44528326     | SNV          | C                             | A:C                                       | 1     |                                           | 0     |  |  |  |  |  |  |  |
| chr2 | 44539443       | 44539443     | SNV          | T                             | C:T                                       | 4     |                                           | 0     |  |  |  |  |  |  |  |
| chr2 | 44505548       | 44505548     | SNV          | C                             | C:T                                       | 1     |                                           | 0     |  |  |  |  |  |  |  |
| chr2 | 44507188       | 44507188     | SNV          | C                             | A:C                                       | 1     |                                           | 0     |  |  |  |  |  |  |  |
| chr2 | 44509979       | 44509979     | SNV          | T                             | A:T                                       | 1     |                                           | 0     |  |  |  |  |  |  |  |
| chr2 | 44517062       | 44517062     | SNV          | G                             | A:G                                       | 2     |                                           | 0     |  |  |  |  |  |  |  |
| chr2 | 44517699       | 44517699     | SNV          | G                             | C:G                                       | 1     |                                           | 0     |  |  |  |  |  |  |  |
| chr2 | 44534940       | 44534940     | SNV          | G                             | A:G                                       | 1     |                                           | 0     |  |  |  |  |  |  |  |
| chr2 | 44526121       | 44526121     | SNV          | T                             | G:T                                       | 2     |                                           | 0     |  |  |  |  |  |  |  |
| chr2 | 44544359       | 44544359     | SNV          | T                             | G:T                                       | 1     |                                           | 0     |  |  |  |  |  |  |  |
| chr2 | 44543237       | 44543237     | SNV          | C                             | C:T                                       | 1     |                                           | 0     |  |  |  |  |  |  |  |
| chr2 | 44524061       | 44524061     | SNV          | C                             | C:T                                       | 5     |                                           | 0     |  |  |  |  |  |  |  |
| chr2 | 44509019       | 44509019     | SNV          | T                             | A:T                                       | 1     |                                           | 0     |  |  |  |  |  |  |  |
| chr2 | 44543622       | 44543622     | SNV          | G                             | A:G                                       | 1     |                                           | 0     |  |  |  |  |  |  |  |
| chr2 | 44544496       | 44544496     | SNV          | G                             | A:G                                       | 1     |                                           | 0     |  |  |  |  |  |  |  |
| chr2 | 44517472       | 44517472     | SNV          | C                             | C:T                                       | 1     |                                           | 0     |  |  |  |  |  |  |  |
| chr2 | 44543268       | 44543268     | SNV          | A                             | A:C                                       | 1     |                                           | 0     |  |  |  |  |  |  |  |
| chr2 | 44502747       | 44502747     | SNV          | G V                           | C:G L:V                                   | 1     |                                           | 0     |  |  |  |  |  |  |  |
| chr2 | 44544466       | 44544466     | SNV          | T                             | G:T                                       | 1     |                                           | 0     |  |  |  |  |  |  |  |
| chr2 | 44542518       | 44542518     | SNV          | T                             | C:T                                       | 1     |                                           | 0     |  |  |  |  |  |  |  |
| chr2 | 44533349       | 44533349     | SNV          | G                             | A:G                                       | 1     |                                           | 0     |  |  |  |  |  |  |  |
| chr2 | 44511229       | 44511229     | SNV          | T                             | A:T                                       | 1     |                                           | 0     |  |  |  |  |  |  |  |
| chr2 | 44531316       | 44531316     | SNV          | G D                           | G:T D:Y                                   | 1     |                                           | 0     |  |  |  |  |  |  |  |
| chr2 | 44528215       | 44528215     | SNV          | G R                           | A:G H:R                                   | 2     |                                           | 0     |  |  |  |  |  |  |  |
| chr2 | 44511270       | 44511270     | SNV          | C                             | A:C                                       | 3     |                                           | 0     |  |  |  |  |  |  |  |
| chr2 | 44547693       | 44547693     | SNV          | G R                           | A:G H:R                                   | 1     |                                           | 0     |  |  |  |  |  |  |  |
| chr2 | 44527476       | 44527476     | SNV          | A                             | A:T                                       | 1     |                                           | 0     |  |  |  |  |  |  |  |
| chr2 | 44526846       | 44526846     | SNV          | T                             | A:T                                       | 1     |                                           | 0     |  |  |  |  |  |  |  |
| chr2 | 44531090       | 44531090     | SNV          | G                             | G:T                                       | 1     |                                           | 0     |  |  |  |  |  |  |  |
| chr2 | 44519815       | 44519815     | SNV          | A                             | A:T                                       | 1     |                                           | 0     |  |  |  |  |  |  |  |
| chr2 | 44523738       | 44523738     | insertion    | -                             | -:A                                       | 3     |                                           | 0     |  |  |  |  |  |  |  |
| chr2 | 44514411       | 44514411     | SNV          | T                             | C:T                                       | 2     |                                           | 0     |  |  |  |  |  |  |  |
| chr2 | 44542387       | 44542387     | SNV          | T                             | C:T                                       | 1     |                                           | 0     |  |  |  |  |  |  |  |
| chr2 | 44525220       | 44525220     | SNV          | C                             | C:G                                       | 1     |                                           | 0     |  |  |  |  |  |  |  |
| chr2 | 44530232       | 44530232     | SNV          | C                             | C:G                                       | 2     |                                           | 0     |  |  |  |  |  |  |  |
| chr2 | 44533347       | 44533347     | SNV          | G                             | A:G                                       | 1     |                                           | 0     |  |  |  |  |  |  |  |
| chr2 | 44507350       | 44507350     | SNV          | G                             | A:G                                       | 1     |                                           | 0     |  |  |  |  |  |  |  |
| chr2 | 44525604       | 44525604     | SNV          | G                             | A:G                                       | 1     |                                           | 0     |  |  |  |  |  |  |  |
| chr2 | 44520922       | 44520922     | SNV          | C                             | C:T                                       | 2     |                                           | 0     |  |  |  |  |  |  |  |
| chr2 | 44540417       | 44540417     | SNV          | G                             | C:G                                       | 1     |                                           | 0     |  |  |  |  |  |  |  |
| chr2 | 44515941       | 44515941     | SNV          | A                             | A:G                                       | 1     |                                           | 0     |  |  |  |  |  |  |  |
| chr2 | 44546868       | 44546868     | SNV          | C                             | C:T                                       | 1     |                                           | 0     |  |  |  |  |  |  |  |
| chr2 | 44546362       | 44546362     | SNV          | C                             | C:T                                       | 1     |                                           | 0     |  |  |  |  |  |  |  |
| chr2 | 44545265       | 44545265     | SNV          | C                             | A:C                                       | 2     |                                           | 0     |  |  |  |  |  |  |  |
| chr2 | 44512540       | 44512540     | SNV          | C                             | C:T                                       | 1     |                                           | 0     |  |  |  |  |  |  |  |
| chr2 | 44541014       | 44541014     | SNV          | G S                           | C:G T:S                                   | 1     |                                           | 0     |  |  |  |  |  |  |  |
| chr2 | 44530972       | 44530972     | SNV          | T                             | C:T                                       | 1     |                                           | 0     |  |  |  |  |  |  |  |
