# Supplementary material for: Population Genetics Analysis of SLC3A1 and SLC7A9 Revealed the Etiology of Cystine Stone May Be More Than What Our Current Genetic Knowledge Can Explain
Source: bioRxiv or medRxiv preprint supplement (doi:10.1101/2023.05.09.23289733), 2023-05-10
Supplement: Supplementary file [file media-2.pdf]

Supplementary Table 2. Variants of SLC7A9 in the 1KG database

| Chr   | Start Position | End Position | Variant type | Ref Genotype   Ref Proteotype | Variant Genotype 1   Variant Proteotype 1 | Count | Variant Genotype 2   Variant Proteotype 2 | Count |
|-------|----------------|--------------|--------------|-------------------------------|-------------------------------------------|-------|-------------------------------------------|-------|
| chr19 | 33221484       | 33221484     | SNV          | G                             | A/G                                       | 87    |                                           | 0     |
| chr19 | 33221447       | 33221447     | SNV          | A                             | G/G                                       | 15    | A/G                                       | 702   |
| chr19 | 33221546       | 33221546     | SNV          | G P                           | A/G S/P                                   | 21    |                                           | 0     |
| chr19 | 33221587       | 33221587     | SNV          | G P                           | A/G L/P                                   | 2     |                                           | 0     |
| chr19 | 33221716       | 33221716     | SNV          | C                             | C/T                                       | 2     |                                           | 0     |
| chr19 | 33221717       | 33221717     | SNV          | A                             | G/G                                       | 347   | A/G                                       | 1050  |
| chr19 | 33221775       | 33221775     | SNV          | C                             | G/G                                       | 24    | C/G                                       | 338   |
| chr19 | 33221821       | 33221821     | SNV          | G                             | A/G                                       | 5     |                                           | 0     |
| chr19 | 33221926       | 33221926     | SNV          | G                             | A/G                                       | 13    |                                           | 0     |
| chr19 | 33221997       | 33221997     | deletion     | GT                            | -GT                                       | 7     |                                           | 0     |
| chr19 | 33221997       | 33221997     | SNV          | G                             | CC                                        | 807   | C/G                                       | 1127  |
| chr19 | 33222086       | 33222086     | SNV          | C                             | T/T                                       | 1     | C/T                                       | 54    |
| chr19 | 33222094       | 33222094     | SNV          | A                             | A/G                                       | 50    |                                           | 0     |
| chr19 | 33222269       | 33222269     | SNV          | C                             | C/T                                       | 1063  | T/T                                       | 1085  |
| chr19 | 33222280       | 33222280     | SNV          | C                             | C/T                                       | 28    |                                           | 0     |
| chr19 | 33222341       | 33222341     | SNV          | C                             | T/T                                       | 22    | C/T                                       | 327   |
| chr19 | 33222359       | 33222359     | insertion    | -                             | -T                                        | 343   |                                           | 28    |
| chr19 | 33222414       | 33222414     | SNV          | C                             | A/C                                       | 898   | A/A                                       | 168   |
| chr19 | 33222431       | 33222431     | SNV          | G                             | A/A                                       | 24    | A/G                                       | 365   |
| chr19 | 33222484       | 33222484     | SNV          | G                             | A/G                                       | 30    |                                           | 0     |
| chr19 | 33222496       | 33222496     | SNV          | A                             | A                                         | 29    |                                           | 0     |
| chr19 | 33222678       | 33222678     | deletion     | C                             | -C                                        | 56    |                                           | 0     |
| chr19 | 33222734       | 33222734     | SNV          | G                             | A/G                                       | 3     |                                           | 0     |
| chr19 | 33222766       | 33222766     | SNV          | A                             | A/G                                       | 1     |                                           | 0     |
| chr19 | 33222907       | 33222907     | SNV          | C                             | C/T                                       | 74    | T/T                                       | 2     |
| chr19 | 33222945       | 33222945     | SNV          | A                             | G/G                                       | 1139  | A/G                                       | 1020  |
| chr19 | 33223010       | 33223010     | SNV          | C                             | C/T                                       | 51    |                                           | 0     |
| chr19 | 33223030       | 33223032     | deletion     | AAC                           | -AAC                                      | 55    | -/A                                       | 1     |
| chr19 | 33223042       | 33223042     | SNV          | G                             | A/A                                       | 1139  |                                           | 1020  |
| chr19 | 33223067       | 33223067     | SNV          | C                             | C/T                                       | 4     |                                           | 0     |
| chr19 | 33223103       | 33223103     | SNV          | G                             | A/G                                       | 389   | A/A                                       | 26    |
| chr19 | 33223214       | 33223214     | SNV          | C                             | C/T                                       | 22    |                                           | 0     |
| chr19 | 33223215       | 33223215     | SNV          | G                             | A/G                                       | 29    |                                           | 0     |
| chr19 | 33223235       | 33223235     | SNV          | G                             | A/G                                       | 41    |                                           | 0     |
| chr19 | 33223290       | 33223290     | SNV          | G                             | G/T                                       | 55    |                                           | 0     |
| chr19 | 33223349       | 33223349     | SNV          | T                             | C/T                                       | 539   | C/C                                       | 51    |
| chr19 | 33223386       | 33223386     | SNV          | G                             | A/G                                       | 29    |                                           | 0     |
| chr19 | 33223437       | 33223437     | SNV          | T                             | A/T                                       | 70    | A/A                                       | 2     |
| chr19 | 33223511       | 33223511     | deletion     | G                             | -G                                        | 981   | -/A                                       | 280   |
| chr19 | 33223535       | 33223535     | SNV          | C                             | C/A                                       | 4     |                                           | 0     |
| chr19 | 33223661       | 33223661     | insertion    | -                             | -A                                        | 25    | -/A                                       | 386   |
| chr19 | 33223846       | 33223846     | SNV          | C                             | C/T                                       | 1     |                                           | 0     |
| chr19 | 33223980       | 33223980     | SNV          | G                             | T/T                                       | 1     | G/T                                       | 54    |
| chr19 | 33224089       | 33224089     | SNV          | G V                           | A/A V/V                                   | 1     | A/G V/V                                   | 71    |
| chr19 | 33224275       | 33224275     | SNV          | T                             | C/C                                       | 7     | C/T                                       | 121   |
| chr19 | 33224711       | 33224711     | deletion     | A                             | -A                                        | 1361  | -/A                                       | 557   |
| chr19 | 33224793       | 33224793     | insertion    | -                             | -T                                        | 16    |                                           | 0     |
| chr19 | 33225006       | 33225006     | SNV          | C                             | C/T                                       | 682   | T/T                                       | 79    |
| chr19 | 33225045       | 33225045     | SNV          | C                             | C/T                                       | 0     |                                           | 0     |
| chr19 | 33225397       | 33225397     | SNV          | G                             | A/G                                       | 8     |                                           | 0     |
| chr19 | 33225451       | 33225451     | SNV          | G                             | G/T                                       | 31    |                                           | 0     |
| chr19 | 33225484       | 33225484     | SNV          | A                             | C/C                                       | 870   | A/C                                       | 1091  |
| chr19 | 33225530       | 33225530     | insertion    | -                             | -A                                        | 1     | -/A                                       | 23    |
| chr19 | 33225586       | 33225586     | SNV          | A                             | A/C                                       | 2     |                                           | 0     |
| chr19 | 33225595       | 33225595     | SNV          | A                             | A/G                                       | 12    |                                           | 0     |
| chr19 | 33225619       | 33225619     | SNV          | G                             | A/G                                       | 3     |                                           | 0     |
| chr19 | 33225682       | 33225682     | SNV          | T                             | C/T                                       | 1     |                                           | 0     |
| chr19 | 33225720       | 33225720     | SNV          | A                             | A/G                                       | 4     |                                           | 0     |
| chr19 | 33225746       | 33225746     | SNV          | G                             | A/G                                       | 3     |                                           | 0     |
| chr19 | 33225841       | 33225841     | SNV          | C                             | T/T                                       | 7     | C/T                                       | 119   |
| chr19 | 33225888       | 33225888     | SNV          | G                             | G/T                                       | 0     |                                           | 1     |
| chr19 | 33225943       | 33225943     | SNV          | A                             | A/G                                       | 1091  | G/G                                       | 870   |
| chr19 | 33226333       | 33226333     | SNV          | A                             | A/G                                       | 3     |                                           | 0     |
| chr19 | 33226462       | 33226462     | SNV          | G                             | A/G                                       | 1     |                                           | 0     |
| chr19 | 33226604       | 33226604     | SNV          | G                             | A/G                                       | 1     |                                           | 0     |
| chr19 | 33226668       | 33226668     | SNV          | C                             | C/G                                       | 29    |                                           | 0     |
| chr19 | 33226679       | 33226679     | SNV          | G                             | C/G                                       | 667   | C/C                                       | 77    |
| chr19 | 33226779       | 33226779     | SNV          | T                             | C/T                                       | 0     |                                           | 29    |
| chr19 | 33226818       | 33226819     | deletion     | TG                            | -T                                        | 544   | -/T                                       | 1260  |
| chr19 | 33226819       | 33226819     | SNV          | G                             | A/G                                       | 56    | A/A                                       | 3     |
| chr19 | 33226889       | 33226889     | SNV          | C                             | C/T                                       | 13    |                                           | 0     |
| chr19 | 33226981       | 33226981     | SNV          | G                             | A/G                                       | 6     | A/A                                       | 1     |
| chr19 | 33227012       | 33227012     | SNV          | G                             | C/G                                       | 36    |                                           | 810   |
| chr19 | 33227082       | 33227082     | SNV          | A                             | A/G                                       | 1129  | G/G                                       | 810   |
| chr19 | 33227186       | 33227186     | SNV          | G                             | A/G                                       | 1129  | A/A                                       | 810   |
| chr19 | 33227202       | 33227202     | SNV          | G                             | A/G                                       | 337   | A/A                                       | 27    |
| chr19 | 33227474       | 33227474     | SNV          | C                             | T/T                                       | 1     | C/T                                       | 33    |
| chr19 | 33227910       | 33227910     | SNV          | C                             | C/T                                       | 4     |                                           | 0     |
| chr19 | 33227961       | 33227961     | deletion     | A                             | -A                                        | 327   | -/A                                       | 22    |
| chr19 | 33228221       | 33228221     | SNV          | C                             | C/T                                       | 2     |                                           | 0     |
| chr19 | 33228380       | 33228380     | SNV          | T                             | C/T                                       | 815   | C/T                                       | 1122  |
| chr19 | 33228397       | 33228422     | deletion     | TCAAAAAAAAAAAAAAAAAAAA        | -TCAAAAAAAAAAAAAAAAAAAA                   | 547   | -/A                                       | 850   |
| chr19 | 33228534       | 33228537     | deletion     | CAAA                          | -CAAA                                     | 5     |                                           | 0     |
| chr19 | 33228574       | 33228574     | SNV          | T                             | C/T                                       | 54    |                                           | 0     |
| chr19 | 33228583       | 33228583     | SNV          | A                             | G/G                                       | 77    | A/G                                       | 668   |
| chr19 | 33228606       | 33228606     | SNV          | C                             | C/T                                       | 37    |                                           | 0     |
| chr19 | 33228812       | 33228812     | SNV          | T                             | C/T                                       | 38    | C/C                                       | 1     |
| chr19 | 33228909       | 33228909     | SNV          | C                             | A/C                                       | 49    |                                           | 0     |
| chr19 | 33229087       | 33229087     | SNV          | C                             | C/T                                       | 2     |                                           | 0     |
| chr19 | 33229100       | 33229100     | SNV          | C                             | C/T                                       | 28    |                                           | 0     |
| chr19 | 33229144       | 33229144     | SNV          | T                             | C/C                                       | 22    | C/T                                       | 327   |
| chr19 | 33229192       | 33229192     | SNV          | A                             | A/G                                       | 29    |                                           | 0     |
| chr19 | 33229435       | 33229435     | insertion    | -                             | -TATAT                                    | 378   | TATAT/TATAT                               | 20    |
| chr19 | 33229448       | 33229448     | SNV          | T                             | C/C                                       | 26    | C/T                                       | 371   |
| chr19 | 33229451       | 33229451     | SNV          | T                             | A/T                                       | 1     |                                           | 0     |
| chr19 | 33229522       | 33229529     | deletion     | TATATACT                      | -TATATACT                                 | 27    |                                           | 0     |
| chr19 | 33229572       | 33229572     | insertion    | -                             | -TAG                                      | 3     |                                           | 0     |
| chr19 | 33229575       | 33229575     | SNV          | G                             | T/T                                       | 8     | G/T                                       | 120   |
| chr19 | 33229595       | 33229600     | deletion     | TATATG                        | -TATATG                                   | 77    | -/A                                       | 665   |
| chr19 | 33229612       | 33229612     | insertion    | AC                            | -A                                        | 22    | -/A                                       | 379   |
| chr19 | 33229639       | 33229640     | deletion     | AC                            | -AC                                       | 29    |                                           | 0     |
| chr19 | 33229712       | 33229715     | deletion     | TATC                          | -TATC                                     | 327   | -/A                                       | 22    |
| chr19 | 33229770       | 33229770     | SNV          | A                             | G/G                                       | 22    | A/G                                       | 327   |
| chr19 | 3330009        | 3330009      | SNV          | G                             | A/G                                       | 58    |                                           | 0     |
| chr19 | 3330079        | 3330079      | SNV          | A                             | A/G                                       | 22    |                                           | 0     |
| chr19 | 3330171        | 3330171      | SNV          | A                             | A/G                                       | 24    |                                           | 0     |
| chr19 | 3330209        | 3330209      | SNV          | C                             | C/G                                       | 29    |                                           | 0     |
| chr19 | 3330320        | 3330320      | SNV          | G                             | A/G                                       | 51    |                                           | 0     |
| chr19 | 3330462        | 3330462      | SNV          | A                             | A/C                                       | 29    |                                           | 0     |
| chr19 | 3330575        | 3330575      | SNV          | C                             | C/T                                       | 7     |                                           | 0     |
| chr19 | 3330666        | 3330666      | SNV          | C                             | G/G                                       | 1089  | C/G                                       | 1058  |
| chr19 | 3330917        | 3330917      | SNV          | C                             | T/T                                       | 787   | C/T                                       | 1139  |
| chr19 | 3330974        | 3330974      | SNV          | T                             | C/T                                       | 0     |                                           | 0     |
| chr19 | 3331102        | 3331102      | SNV          | G                             | A/G                                       | 1     |                                           | 0     |
| chr19 | 3331218        | 3331218      | SNV          | A                             | G/G                                       | 8     | A/G                                       | 135   |
| chr19 | 3331458        | 3331468      | deletion     | TGGCCTCTCTG                   | -TGGCCTCTCTG                              | 56    |                                           | 0     |
| chr19 | 3331529        | 3331529      | SNV          | T                             | C/T                                       | 33    |                                           | 0     |
| chr19 | 3331544        | 3331544      | SNV          | A                             | G/G                                       | 25    | A/G                                       | 388   |
| chr19 | 3331573        | 3331573      | SNV          | C                             | C/G                                       | 0     |                                           | 0     |
| chr19 | 3331598        | 3331598      | SNV          | A                             | A/G                                       | 118   |                                           | 0     |
| chr19 | 3331618        | 3331618      | SNV          | T                             | C/T                                       | 1     |                                           | 0     |
| chr19 | 3331722        | 3331722      | SNV          | G                             | A/G                                       | 2     |                                           | 0     |
| chr19 | 3331738        | 3331738      | SNV          | G                             | A/G                                       | 1     |                                           | 0     |
| chr19 | 3331910        | 3331910      | SNV          | T                             | C/T                                       | 37    | C/C                                       | 1     |
| chr19 | 3331913        | 3331913      | SNV          | C                             | T/T                                       | 516   | C/T                                       | 1176  |
| chr19 | 3332189        | 3332189      | SNV          | A                             | A/G                                       | 0     |                                           | 0     |
| chr19 | 3332212        | 3332212      | SNV          | C                             | C/G                                       | 334   | G/G                                       | 22    |
| chr19 | 3332516        | 3332516      | SNV          | G                             | A/G                                       | 377   | A/A                                       | 22    |
| chr19 | 3332642        | 3332642      | SNV          | A                             | G/G                                       | 22    | A/G                                       | 376   |
| chr19 | 3332737        | 3332737      | SNV          | G                             | A/G                                       | 5     |                                           | 0     |
| chr19 | 3332791        | 3332791      | SNV          | C                             | T/T                                       | 1     | C/T                                       | 33    |
| chr19 | 3332828        | 3332828      | SNV          | C                             | G/G                                       | 1082  | C/G                                       | 1060  |

Supplementary Table 2. Variants of SLC7A9 in the 1KG database

| Chr   | Start Position | End Position | Variant type | Ref Genotype   Ref Proteotype | Variant Genotype 1   Variant Proteotype 1 | Count | Variant Genotype 2   Variant Proteotype 2 | Count |
|-------|----------------|--------------|--------------|-------------------------------|-------------------------------------------|-------|-------------------------------------------|-------|
| chr19 | 3332920        | 3332920      | SNV          | A                             | A/C                                       | 5     |                                           | 0     |
| chr19 | 3332927        | 3332927      | SNV          | G                             | A/G                                       | 12    |                                           | 0     |
| chr19 | 3332952        | 3332952      | SNV          | C                             | C/T                                       | 695   | TT                                        | 82    |
| chr19 | 3333096        | 3333096      | SNV          | TTK                           | C/T RK                                    | 1     |                                           | 0     |
| chr19 | 3333155        | 3333155      | SNV          | G A                           | A/G AA                                    | 911   | A A AA                                    | 166   |
| chr19 | 3333342        | 3333342      | SNV          | A                             | A/C                                       | 13    |                                           | 0     |
| chr19 | 3333348        | 3333348      | SNV          | T                             | A/T                                       | 1     |                                           | 0     |
| chr19 | 3333360        | 3333360      | SNV          | G                             | A/G                                       | 60    | A A                                       | 2     |
| chr19 | 3333374        | 3333374      | SNV          | C                             | C/T                                       | 1     |                                           | 0     |
| chr19 | 3333375        | 3333375      | SNV          | G                             | A/G                                       | 10    |                                           | 0     |
| chr19 | 33334025       | 33334025     | SNV          | C                             | C/T                                       | 328   | TT                                        | 22    |
| chr19 | 33334161       | 33334161     | SNV          | A                             | G/G                                       | 1088  | A/G                                       | 1057  |
| chr19 | 33334207       | 33334207     | deletion     | A                             | -A                                        | 3     |                                           | 0     |
| chr19 | 33334255       | 33334255     | SNV          | C                             | C/T                                       | 23    |                                           | 0     |
| chr19 | 33334211       | 33334211     | SNV          | C                             | C/T                                       | 3     |                                           | 0     |
| chr19 | 33334362       | 33334362     | SNV          | G                             | A/G                                       | 30    |                                           | 0     |
| chr19 | 33334366       | 33334366     | insertion    | -                             | AA                                        | 7     | -A                                        | 136   |
| chr19 | 33334394       | 33334395     | deletion     | CA                            | --                                        | 2     | --CA                                      | 90    |
| chr19 | 33334415       | 33334415     | SNV          | T                             | T/C                                       | 1061  | CC                                        | 1080  |
| chr19 | 33334441       | 33334441     | SNV          | G                             | A/G                                       | 4     |                                           | 0     |
| chr19 | 33334546       | 33334546     | SNV          | A                             | A/G                                       | 1     |                                           | 0     |
| chr19 | 33334565       | 33334565     | SNV          | A                             | CC                                        | 1     | A/C                                       | 30    |
| chr19 | 33334641       | 33334641     | SNV          | A                             | A/G                                       | 2     |                                           | 0     |
| chr19 | 33334693       | 33334693     | SNV          | G                             | A/G                                       | 241   | A A                                       | 24    |
| chr19 | 33334776       | 33334776     | SNV          | G P                           | A/G P P                                   | 13    |                                           | 0     |
| chr19 | 33334874       | 33334874     | SNV          | C                             | C/T                                       | 6     |                                           | 0     |
| chr19 | 33334882       | 33334882     | SNV          | C                             | T/T                                       | 1     | C/T                                       | 27    |
| chr19 | 33334934       | 33334934     | SNV          | G                             | A/G                                       | 1     |                                           | 0     |
| chr19 | 33334978       | 33334978     | SNV          | G                             | A/G                                       | 788   | A A                                       | 176   |
| chr19 | 33335085       | 33335085     | SNV          | G                             | A/G                                       | 20    |                                           | 0     |
| chr19 | 33335943       | 33335943     | SNV          | G                             | AA                                        | 809   | A/G                                       | 1125  |
| chr19 | 33335984       | 33335984     | SNV          | C                             | C/T                                       | 185   | TT                                        | 9     |
| chr19 | 33335985       | 33335985     | SNV          | G                             | A/G                                       | 2     |                                           | 0     |
| chr19 | 33336011       | 33336011     | SNV          | A                             | T/T                                       | 1     | A/T                                       | 33    |
| chr19 | 33336073       | 33336073     | SNV          | A                             | A/G                                       | 8     |                                           | 0     |
| chr19 | 33336080       | 33336083     | deletion     | AAAT                          | --AAAT                                    | 1125  | --                                        | 809   |
| chr19 | 33336213       | 33336213     | SNV          | C                             | T/T                                       | 176   | C/T                                       | 789   |
| chr19 | 33336230       | 33336230     | SNV          | G                             | A/G                                       | 328   | A A                                       | 22    |
| chr19 | 33336262       | 33336262     | SNV          | G                             | A A                                       | 1     | A/G                                       | 9     |
| chr19 | 33336269       | 33336269     | SNV          | C                             | T/T                                       | 810   | C/T                                       | 1124  |
| chr19 | 33336270       | 33336270     | SNV          | G                             | A/G                                       | 14    |                                           | 0     |
| chr19 | 33336330       | 33336330     | SNV          | A                             | A/G                                       | 5     |                                           | 0     |
| chr19 | 33336337       | 33336337     | SNV          | G                             | A/G                                       | 1     |                                           | 0     |
| chr19 | 33336651       | 33336651     | SNV          | T                             | C/C                                       | 1     | C/T                                       | 12    |
| chr19 | 33336667       | 33336667     | SNV          | A                             | A/G                                       | 7     |                                           | 0     |
| chr19 | 33336711       | 33336711     | SNV          | C                             | C/T                                       | 612   | TT                                        | 59    |
| chr19 | 33336774       | 33336774     | SNV          | A                             | A/G                                       | 1018  | G/G                                       | 1134  |
| chr19 | 33336859       | 33336859     | SNV          | G                             | A/G                                       | 74    | A A                                       | 1     |
| chr19 | 33337075       | 33337075     | SNV          | C                             | C/T                                       | 49    |                                           | 0     |
| chr19 | 33337081       | 33337081     | SNV          | A                             | A/G                                       | 1     |                                           | 0     |
| chr19 | 33337085       | 33337085     | SNV          | T                             | C/T                                       | 2     |                                           | 0     |
| chr19 | 33337100       | 33337100     | SNV          | G                             | A/G                                       | 16    |                                           | 0     |
| chr19 | 33337111       | 33337111     | SNV          | G                             | A/G                                       | 379   | A A                                       | 22    |
| chr19 | 33337189       | 33337189     | deletion     | C                             | --                                        | 807   | --C                                       | 1127  |
| chr19 | 33337248       | 33337248     | SNV          | C                             | A/C                                       | 22    |                                           | 0     |
| chr19 | 33337280       | 33337280     | SNV          | C                             | C/T                                       | 14    |                                           | 0     |
| chr19 | 33337303       | 33337303     | SNV          | C                             | C/T                                       | 787   | TT                                        | 176   |
| chr19 | 33337310       | 33337310     | SNV          | A                             | A/G                                       | 1062  | G/G                                       | 1079  |
| chr19 | 33337379       | 33337379     | SNV          | G                             | A/G                                       | 20    | A A                                       | 1     |
| chr19 | 33337423       | 33337423     | SNV          | A                             | G/G                                       | 1079  | A/G                                       | 1062  |
| chr19 | 33337534       | 33337534     | SNV          | T                             | C/T                                       | 17    |                                           | 0     |
| chr19 | 33337608       | 33337608     | SNV          | G                             | C/T                                       | 1     | C/G                                       | 28    |
| chr19 | 33337669       | 33337669     | SNV          | A                             | CC                                        | 22    | A/C                                       | 377   |
| chr19 | 33337686       | 33337686     | SNV          | G                             | CC                                        | 3     | C/G                                       | 52    |
| chr19 | 33337775       | 33337775     | SNV          | G                             | A/G                                       | 0     |                                           | 0     |
| chr19 | 33337861       | 33337861     | SNV          | G                             | A/G                                       | 377   | A A                                       | 22    |
| chr19 | 33337924       | 33337924     | SNV          | C                             | C/T                                       | 2     |                                           | 0     |
| chr19 | 33338073       | 33338073     | SNV          | T                             | C/T                                       | 376   | CC                                        | 22    |
| chr19 | 33338083       | 33338083     | SNV          | C                             | C/T                                       | 49    |                                           | 0     |
| chr19 | 33338089       | 33338089     | SNV          | A                             | A/G                                       | 376   | G/G                                       | 22    |
| chr19 | 33338105       | 33338105     | SNV          | G                             | AA                                        | 1     | A/G                                       | 44    |
| chr19 | 33338118       | 33338118     | SNV          | A                             | GG                                        | 22    | A/G                                       | 375   |
| chr19 | 33338119       | 33338119     | SNV          | A                             | A/C                                       | 375   | CC                                        | 22    |
| chr19 | 33338207       | 33338207     | SNV          | A                             | A/G                                       | 1061  | G/G                                       | 1080  |
| chr19 | 33338281       | 33338281     | SNV          | A                             | A/G                                       | 1     |                                           | 0     |
| chr19 | 33338286       | 33338286     | SNV          | G                             | A/G                                       | 7     |                                           | 0     |
| chr19 | 33338350       | 33338350     | insertion    | -                             | -GATGAAATG                                | 237   | GATGAAATG-GATGAAATG                       | 21    |
| chr19 | 33338372       | 33338372     | SNV          | C                             | C/T                                       | 50    |                                           | 0     |
| chr19 | 33338573       | 33338573     | SNV          | G                             | A/G                                       | 28    |                                           | 0     |
| chr19 | 33338566       | 33338566     | SNV          | T                             | A/T                                       | 11    |                                           | 0     |
| chr19 | 33338573       | 33338573     | SNV          | A                             | A/T                                       | 2     |                                           | 0     |
| chr19 | 33338605       | 33338605     | SNV          | C                             | T/T                                       | 82    | C/T                                       | 694   |
| chr19 | 33338721       | 33338721     | SNV          | C                             | C/T                                       | 1125  | TT                                        | 809   |
| chr19 | 33338723       | 33338723     | SNV          | G                             | AA                                        | 22    | A/G                                       | 328   |
| chr19 | 33338784       | 33338784     | SNV          | C                             | C/T                                       | 0     |                                           | 0     |
| chr19 | 33338790       | 33338790     | SNV          | G                             | A/G                                       | 58    |                                           | 0     |
| chr19 | 33338827       | 33338827     | SNV          | G                             | A A                                       | 1080  | A/G                                       | 1061  |
| chr19 | 33338839       | 33338839     | SNV          | G                             | A/G                                       | 377   | A A                                       | 22    |
| chr19 | 33339247       | 33339247     | SNV          | G                             | G/T                                       | 1     |                                           | 0     |
| chr19 | 33339321       | 33339321     | SNV          | C                             | A A                                       | 176   | A/C                                       | 789   |
| chr19 | 33339360       | 33339360     | deletion     | A                             | --                                        | 165   | --A                                       | 908   |
| chr19 | 33339427       | 33339427     | SNV          | C                             | C/T                                       | 191   | TT                                        | 17    |
| chr19 | 33339547       | 33339547     | SNV          | C                             | C/G                                       | 2     |                                           | 0     |
| chr19 | 33339737       | 33339737     | SNV          | T                             | C/T                                       | 6     |                                           | 0     |
| chr19 | 33339871       | 33339871     | deletion     | A                             | --                                        | 22    | --A                                       | 328   |
| chr19 | 33340192       | 33340192     | SNV          | A                             | A/G                                       | 329   | G/G                                       | 20    |
| chr19 | 33340611       | 33340611     | SNV          | A                             | A/C                                       | 378   | CC                                        | 20    |
| chr19 | 33341116       | 33341116     | SNV          | G                             | CC                                        | 166   | C/G                                       | 901   |
| chr19 | 33341184       | 33341184     | SNV          | T                             | A A                                       | 1005  | A/T                                       | 1081  |
| chr19 | 33341485       | 33341485     | SNV          | A                             | A/G                                       | 57    |                                           | 0     |
| chr19 | 33341621       | 33341621     | SNV          | A                             | A/C                                       | 109   | CC                                        | 8     |
| chr19 | 33341852       | 33341852     | SNV          | G                             | A/G                                       | 5     |                                           | 0     |
| chr19 | 33342084       | 33342084     | SNV          | T                             | C/T                                       | 330   | CC                                        | 25    |
| chr19 | 33342169       | 33342169     | SNV          | G                             | A/G                                       | 2     |                                           | 0     |
| chr19 | 33342403       | 33342403     | SNV          | C                             | C/T                                       | 1232  | TT                                        | 548   |
| chr19 | 33342551       | 33342551     | SNV          | A                             | A/G                                       | 7     |                                           | 0     |
| chr19 | 33342584       | 33342584     | deletion     | A                             | --C                                       | 4     |                                           | 0     |
| chr19 | 33342628       | 33342628     | SNV          | G                             | AA                                        | 28    | A/G                                       | 340   |
| chr19 | 33342719       | 33342719     | SNV          | C                             | C/G                                       | 4     |                                           | 0     |
| chr19 | 33342833       | 33342833     | SNV          | A                             | A/C                                       | 22    |                                           | 0     |
| chr19 | 33342842       | 33342842     | SNV          | C                             | C/T                                       | 94    | TT                                        | 9     |
| chr19 | 33342844       | 33342844     | SNV          | G                             | A/G                                       | 705   | A A                                       | 82    |
| chr19 | 33342916       | 33342916     | SNV          | G                             | A/G                                       | 332   | A A                                       | 22    |
| chr19 | 33342950       | 33342950     | SNV          | A                             | A/T                                       | 2     |                                           | 0     |
| chr19 | 33342977       | 33342977     | SNV          | A                             | A/T                                       | 789   | TT                                        | 176   |
| chr19 | 33343178       | 33343178     | SNV          | C                             | A/C                                       | 15    |                                           | 0     |
| chr19 | 33343405       | 33343405     | SNV          | C                             | C/T                                       | 0     |                                           | 0     |
| chr19 | 33343599       | 33343599     | SNV          | G                             | A/G                                       | 1     |                                           | 0     |
| chr19 | 33343616       | 33343616     | SNV          | A                             | A/T                                       | 377   | TT                                        | 22    |
| chr19 | 33343684       | 33343684     | SNV          | G                             | C/G                                       | 19    | CC                                        | 2     |
| chr19 | 33343722       | 33343722     | SNV          | C                             | C/G                                       | 1094  | G/G                                       | 1035  |
| chr19 | 33343851       | 33343851     | SNV          | G                             | A/G                                       | 789   | A A                                       | 176   |
| chr19 | 33343955       | 33343955     | SNV          | G                             | G/T                                       | 1127  | TT                                        | 809   |
| chr19 | 33343968       | 33343968     | SNV          | C                             | C/T                                       | 28    |                                           | 0     |
| chr19 | 33343977       | 33343977     | SNV          | C                             | C/T                                       | 15    |                                           | 0     |
| chr19 | 33344068       | 33344068     | SNV          | C                             | C/T                                       | 46    |                                           | 0     |
| chr19 | 33344221       | 33344221     | SNV          | A                             | A/G                                       | 1     |                                           | 0     |
| chr19 | 33344417       | 33344417     | deletion     | T                             | --                                        | 779   | --T                                       | 1135  |
| chr19 | 33344545       | 33344545     | SNV          | A                             | A/C                                       | 2     |                                           | 0     |
| chr19 | 33344573       | 33344573     | SNV          | A                             | A/G                                       | 28    |                                           | 0     |
| chr19 | 33344823       | 33344826     | deletion     | AAAA                          | --AAAA                                    | 1052  | --                                        | 1105  |

Supplementary Table 2. Variants of SLC7A9 in the 1KG database

| Chr   | Start Position | End Position | Variant type | Ref Genotype   Ref Proteotype | Variant Genotype 1   Variant Proteotype 1 | Count | Variant Genotype 2   Variant Proteotype 2 | Count |
|-------|----------------|--------------|--------------|-------------------------------|-------------------------------------------|-------|-------------------------------------------|-------|
| chr19 | 33344949       | 33344949     | SNV          | T                             | CT                                        | 1     |                                           | 0     |
| chr19 | 33344989       | 33344989     | SNV          | G                             | CG                                        | 27    |                                           | 0     |
| chr19 | 33345404       | 33345406     | deletion     | TTG                           |                                           | 9     |                                           | 0     |
| chr19 | 33345563       | 33345563     | SNV          | C                             | CT                                        | 12    |                                           | 0     |
| chr19 | 33345588       | 33345588     | SNV          | G                             | AG                                        | 9     |                                           | 0     |
| chr19 | 33345796       | 33345796     | SNV          | G                             | TT                                        | 1     | G:T                                       | 11    |
| chr19 | 33345805       | 33345805     | SNV          | T                             | G:T                                       | 1     |                                           | 0     |
| chr19 | 33345858       | 33345858     | insertion    | -                             | TATA                                      | 1     | -TA                                       | 62    |
| chr19 | 33345945       | 33345945     | SNV          | G                             | AA                                        | 797   | A:G                                       | 1143  |
| chr19 | 33346027       | 33346027     | SNV          | G                             | A:G                                       | 1     |                                           | 0     |
| chr19 | 33346046       | 33346046     | SNV          | C                             | CT                                        | 477   | T:T                                       | 30    |
| chr19 | 33346135       | 33346135     | SNV          | G                             | A:G                                       | 1144  | A:A                                       | 792   |
| chr19 | 33346201       | 33346201     | SNV          | T                             | C:T                                       | 6     |                                           | 0     |
| chr19 | 33346204       | 33346204     | SNV          | G                             | A:A                                       | 1077  | A:G                                       | 1077  |
| chr19 | 33346220       | 33346220     | SNV          | G                             | AG                                        | 63    |                                           | 1     |
| chr19 | 33346331       | 33346331     | SNV          | C                             | T:T                                       | 6     | C:T                                       | 164   |
| chr19 | 33346341       | 33346341     | SNV          | C                             | CT                                        | 1202  | T:T                                       | 640   |
| chr19 | 33346344       | 33346344     | SNV          | G                             | A:G                                       | 21    |                                           | 0     |
| chr19 | 33346354       | 33346354     | SNV          | C                             | A:C                                       | 6     |                                           | 0     |
| chr19 | 33346372       | 33346372     | SNV          | A                             | A:G                                       | 135   | G:G                                       | 1     |
| chr19 | 33346402       | 33346402     | SNV          | A                             | G:G                                       | 1     | A:G                                       | 104   |
| chr19 | 33346412       | 33346412     | SNV          | T                             | CC                                        | 38    | C:T                                       | 518   |
| chr19 | 33346416       | 33346416     | SNV          | A                             | A:T                                       | 1017  | T:T                                       | 293   |
| chr19 | 33346421       | 33346421     | SNV          | C                             | CT                                        | 3     |                                           | 0     |
| chr19 | 33346422       | 33346422     | SNV          | G                             | A:G                                       | 2     |                                           | 0     |
| chr19 | 33346430       | 33346430     | SNV          | C                             | T:T                                       | 2     | C:T                                       | 89    |
| chr19 | 33346433       | 33346433     | SNV          | A                             | A:G                                       | 415   | G:G                                       | 17    |
| chr19 | 33346480       | 33346480     | SNV          | C                             | C:T                                       | 16    |                                           | 0     |
| chr19 | 33346481       | 33346481     | SNV          | A                             | A:G                                       | 18    |                                           | 0     |
| chr19 | 33346525       | 33346525     | SNV          | G                             | A:G                                       | 14    |                                           | 0     |
| chr19 | 33346526       | 33346526     | insertion    | -                             | GA:GA                                     | 1     | -GA                                       | 95    |
| chr19 | 33346544       | 33346544     | SNV          | C                             | C:G                                       | 1     |                                           | 0     |
| chr19 | 33346586       | 33346586     | SNV          | T                             | CT                                        | 38    | CC                                        | 1     |
| chr19 | 33346607       | 33346607     | insertion    | -                             | -A                                        | 447   | A:A                                       | 20    |
| chr19 | 33346686       | 33346686     | SNV          | C                             | CT                                        | 1     |                                           | 0     |
| chr19 | 33346770       | 33346770     | SNV          | C                             | CT                                        | 517   | T:T                                       | 44    |
| chr19 | 33346799       | 33346799     | SNV          | G                             | CC                                        | 37    | C:G                                       | 526   |
| chr19 | 33346836       | 33346836     | SNV          | G                             | A:G                                       | 67    | A:A                                       | 2     |
| chr19 | 33346883       | 33346883     | SNV          | T                             | CT                                        | 470   | CC                                        | 30    |
| chr19 | 33347193       | 33347193     | SNV          | G                             | CT                                        | 415   | C:C                                       | 26    |
| chr19 | 33347246       | 33347246     | SNV          | G                             | A:G                                       | 21    | A:G                                       | 218   |
| chr19 | 33347277       | 33347277     | SNV          | A                             | T:T                                       | 25    | A:T                                       | 417   |
| chr19 | 33347291       | 33347291     | SNV          | A                             | A:G                                       | 1     |                                           | 0     |
| chr19 | 33347327       | 33347327     | SNV          | C                             | C:T                                       | 38    |                                           | 0     |
| chr19 | 33347352       | 33347352     | SNV          | G                             | A:G                                       | 13    |                                           | 0     |
| chr19 | 33347353       | 33347353     | SNV          | G                             | C:G                                       | 3     |                                           | 0     |
| chr19 | 33347390       | 33347390     | SNV          | A                             | A:G                                       | 22    |                                           | 0     |
| chr19 | 33347391       | 33347391     | SNV          | T                             | C:T                                       | 22    |                                           | 0     |
| chr19 | 33347403       | 33347403     | SNV          | G                             | G:T                                       | 326   | T:T                                       | 21    |
| chr19 | 33347439       | 33347439     | SNV          | G                             | A:G                                       | 33    | A:A                                       | 1     |
| chr19 | 33347461       | 33347463     | deletion     | AAT                           | -AAT                                      | 9     |                                           | 0     |
| chr19 | 33347776       | 33347776     | SNV          | C                             | CT                                        | 22    |                                           | 0     |
| chr19 | 33347781       | 33347781     | SNV          | G                             | G:T                                       | 20    |                                           | 0     |
| chr19 | 33347840       | 33347840     | SNV          | C                             | C:T                                       | 2     |                                           | 0     |
| chr19 | 33348190       | 33348190     | SNV          | G                             | A:A                                       | 26    | A:G                                       | 430   |
| chr19 | 33348191       | 33348191     | SNV          | A                             | T:T                                       | 2     | A:T                                       | 63    |
| chr19 | 33348230       | 33348230     | SNV          | G                             | G:T                                       | 25    |                                           | 0     |
| chr19 | 33348269       | 33348269     | SNV          | G                             | C:G                                       | 1     |                                           | 0     |
| chr19 | 33348390       | 33348390     | deletion     | A                             | -A                                        | 927   | -                                         | 190   |
| chr19 | 33348418       | 33348418     | SNV          | G                             | A:A                                       | 48    | A:G                                       | 549   |
| chr19 | 33348615       | 33348615     | SNV          | A                             | A:G                                       | 1     |                                           | 0     |
| chr19 | 33348638       | 33348638     | SNV          | G                             | A:G                                       | 3     |                                           | 0     |
| chr19 | 33349179       | 33349179     | SNV          | G                             | A:G                                       | 401   | A:A                                       | 21    |
| chr19 | 33349274       | 33349274     | SNV          | G                             | C:G                                       | 2     |                                           | 0     |
| chr19 | 33349295       | 33349295     | SNV          | T                             | C:C                                       | 39    | C:T                                       | 548   |
| chr19 | 33349351       | 33349351     | SNV          | CIA                           | CTIAA                                     | 34    |                                           | 0     |
| chr19 | 33349381       | 33349381     | SNV          | GII                           | A:G(II)                                   | 1     |                                           | 0     |
| chr19 | 33349488       | 33349488     | SNV          | T                             | C:C                                       | 1530  | C:T                                       | 785   |
| chr19 | 33349613       | 33349613     | SNV          | C                             | CT                                        | 1     |                                           | 0     |
| chr19 | 33349674       | 33349674     | SNV          | C                             | A:A                                       | 1     | A:C                                       | 33    |
| chr19 | 33349676       | 33349676     | SNV          | T                             | A:T                                       | 714   | A:A                                       | 81    |
| chr19 | 33349694       | 33349694     | SNV          | A                             | A:G                                       | 17    |                                           | 0     |
| chr19 | 33349715       | 33349715     | SNV          | C                             | C:C                                       | 2     | A:C                                       | 83    |
| chr19 | 33349751       | 33349751     | SNV          | A                             | A:G                                       | 300   | G:G                                       | 21    |
| chr19 | 33349764       | 33349764     | SNV          | G                             | A:G                                       | 715   | A:A                                       | 77    |
| chr19 | 33349805       | 33349805     | SNV          | G                             | A:G                                       | 64    |                                           | 0     |
| chr19 | 33349930       | 33349930     | SNV          | C                             | CT                                        | 1022  | T:T                                       | 212   |
| chr19 | 33349967       | 33349967     | SNV          | A                             | A:C                                       | 78    | CC                                        | 0     |
| chr19 | 33349992       | 33349992     | SNV          | C                             | CT                                        | 1     |                                           | 0     |
| chr19 | 33350060       | 33350060     | SNV          | T                             | C:C                                       | 120   | C:T                                       | 1063  |
| chr19 | 33350071       | 33350071     | SNV          | T                             | C:T                                       | 8     |                                           | 0     |
| chr19 | 33350101       | 33350101     | SNV          | G                             | A:A                                       | 176   | A:G                                       | 959   |
| chr19 | 33350106       | 33350106     | SNV          | A                             | A:G                                       | 7     | G:G                                       | 1     |
| chr19 | 33350249       | 33350249     | insertion    | -                             | -T                                        | 26    |                                           | 0     |
| chr19 | 33350263       | 33350263     | SNV          | C                             | G:G                                       | 6     | C:G                                       | 143   |
| chr19 | 33350395       | 33350395     | SNV          | T                             | C:C                                       | 2     | C:T                                       | 61    |
| chr19 | 33350315       | 33350315     | SNV          | G                             | A:G                                       | 26    |                                           | 0     |
| chr19 | 33350479       | 33350479     | SNV          | A                             | A:G                                       | 102   | G:G                                       | 33    |
| chr19 | 33350610       | 33350610     | SNV          | G                             | A:G                                       | 2     |                                           | 0     |
| chr19 | 33350622       | 33350622     | SNV          | T                             | C:T                                       | 1     |                                           | 0     |
| chr19 | 33351065       | 33351065     | SNV          | A                             | A:G                                       | 20    |                                           | 0     |
| chr19 | 33351136       | 33351136     | SNV          | C                             | CT                                        | 47    | T:T                                       | 1     |
| chr19 | 33351695       | 33351695     | SNV          | T                             | CT                                        | 1161  | CC                                        | 312   |
| chr19 | 33351913       | 33351913     | SNV          | G                             | A:G                                       | 15    |                                           | 0     |
| chr19 | 33351972       | 33351972     | SNV          | C                             | CT                                        | 20    |                                           | 0     |
| chr19 | 33352041       | 33352041     | SNV          | C                             | C:G                                       | 28    |                                           | 0     |
| chr19 | 33352186       | 33352186     | SNV          | C                             | CT                                        | 25    |                                           | 0     |
| chr19 | 33352190       | 33352190     | SNV          | A                             | A:C                                       | 4     |                                           | 0     |
| chr19 | 33352287       | 33352287     | SNV          | C                             | C:T                                       | 20    |                                           | 0     |
| chr19 | 33352449       | 33352449     | SNV          | G                             | A:G                                       | 17    |                                           | 0     |
| chr19 | 33352456       | 33352456     | SNV          | G                             | A:G                                       | 38    |                                           | 0     |
| chr19 | 33352484       | 33352484     | SNV          | A                             | A:G                                       | 120   | A:A                                       | 9     |
| chr19 | 33352654       | 33352654     | SNV          | A                             | A:G                                       | 1059  | G:G                                       | 214   |
| chr19 | 33352720       | 33352720     | insertion    | -                             | -AAAAAAC                                  | 6     |                                           | 0     |
| chr19 | 33352770       | 33352770     | SNV          | G                             | A:G                                       | 804   | A:A                                       | 106   |
| chr19 | 33352840       | 33352840     | SNV          | G                             | G:T                                       | 2     |                                           | 0     |
| chr19 | 33352871       | 33352871     | SNV          | C                             | CT                                        | 2     |                                           | 0     |
| chr19 | 33352961       | 33352961     | SNV          | G                             | A:G                                       | 4     |                                           | 0     |
| chr19 | 33352969       | 33352969     | SNV          | G                             | A:G                                       | 1     |                                           | 0     |
| chr19 | 33352980       | 33352980     | SNV          | A                             | A:G                                       | 19    |                                           | 0     |
| chr19 | 33352997       | 33352997     | SNV          | G                             | A:G                                       | 1     |                                           | 0     |
| chr19 | 33353041       | 33353041     | SNV          | GIL                           | A:G(ILL)                                  | 1013  | A:ILL                                     | 190   |
| chr19 | 33353061       | 33353061     | SNV          | GIL                           | G:T(ILLM)                                 | 1013  | T:IMM                                     | 190   |
| chr19 | 33353215       | 33353215     | SNV          | G                             | A:G                                       | 125   | A:A                                       | 10    |
| chr19 | 33353343       | 33353343     | SNV          | A                             | G:G                                       | 193   | A:G                                       | 1017  |
| chr19 | 33353357       | 33353357     | SNV          | C                             | C:T                                       | 320   | T:T                                       | 21    |
| chr19 | 33353427       | 33353427     | SNV          | CIA                           | CTIACT                                    | 5     |                                           | 0     |
| chr19 | 33353464       | 33353464     | SNV          | GIS                           | AGISS                                     | 1016  | A:ISS                                     | 193   |
| chr19 | 33353580       | 33353580     | SNV          | T                             | ACT                                       | 39    | A:A                                       | 1     |
| chr19 | 33353581       | 33353581     | SNV          | T                             | A:T                                       | 24    |                                           | 0     |
| chr19 | 33353582       | 33353582     | SNV          | T                             | A:T                                       | 2     |                                           | 0     |
| chr19 | 33353716       | 33353716     | SNV          | G                             | A:G                                       | 2     |                                           | 0     |
| chr19 | 33353854       | 33353854     | SNV          | T                             | C:C                                       | 225   | C:T                                       | 1067  |
| chr19 | 33353889       | 33353889     | SNV          | G                             | G:T                                       | 24    |                                           | 0     |
| chr19 | 33354189       | 33354189     | SNV          | C                             | C:T                                       | 316   | T:T                                       | 21    |
| chr19 | 33354255       | 33354255     | SNV          | A                             | A:T                                       | 1     |                                           | 0     |
| chr19 | 33354280       | 33354280     | SNV          | A                             | A:G                                       | 1067  | G:G                                       | 233   |
| chr19 | 33354401       | 33354401     | SNV          | A                             | A:G                                       | 315   | A:A                                       | 21    |
| chr19 | 33354404       | 33354404     | SNV          | G                             | A:G                                       | 320   | A:A                                       | 21    |
| chr19 | 33354576       | 33354576     | insertion    | -                             | -CC                                       | 11    |                                           | 0     |
| chr19 | 33354676       | 33354676     | SNV          | G                             | A:A                                       | 1     | A:G                                       | 76    |

Supplementary Table 2. Variants of SLC7A9 in the 1KG database

| Chr   | Start Position | End Position | Variant type | Ref Genotype   Ref Proteotype | Variant Genotype 1   Variant Proteotype 1 | Count | Variant Genotype 2   Variant Proteotype 2 | Count |
|-------|----------------|--------------|--------------|-------------------------------|-------------------------------------------|-------|-------------------------------------------|-------|
| chr19 | 33354820       | 33354820     | SNV          | C                             | CT                                        | 60    |                                           | 0     |
| chr19 | 33354826       | 33354826     | insertion    | -                             | -C                                        | 2     |                                           | 0     |
| chr19 | 33354832       | 33354832     | SNV          | A                             | G                                         | 1     | A-G                                       | 23    |
| chr19 | 33354992       | 33354992     | SNV          | A                             | A-G                                       | 363   | G-G                                       | 21    |
| chr19 | 33355055       | 33355055     | SNV          | A V                           | G G A                                     | 232   | A G V                                     | 1069  |
| chr19 | 33355069       | 33355069     | SNV          | A C                           | G G C                                     | 21    | A G C                                     | 320   |
| chr19 | 33355081       | 33355081     | SNV          | G S                           | A A S                                     | 117   | A G S                                     | 825   |
| chr19 | 33355167       | 33355167     | SNV          | C G                           | C T G                                     | 0     |                                           | 0     |
| chr19 | 33355228       | 33355228     | SNV          | C A                           | C T A                                     | 17    |                                           | 0     |
| chr19 | 33355295       | 33355295     | SNV          | G                             | A-G                                       | 8     | A-A                                       | 1     |
| chr19 | 33355305       | 33355305     | SNV          | A                             | A-T                                       | 4     |                                           | 0     |
| chr19 | 33355326       | 33355326     | SNV          | T                             | A-T                                       | 13    |                                           | 0     |
| chr19 | 33355356       | 33355356     | SNV          | C                             | C-T                                       | 321   | T-T                                       | 20    |
| chr19 | 33355495       | 33355495     | SNV          | A                             | A-C                                       | 1     |                                           | 0     |
| chr19 | 33355513       | 33355513     | SNV          | A                             | A-C                                       | 1033  | C-C                                       | 202   |
| chr19 | 33355542       | 33355542     | SNV          | C A                           | G G A                                     | 1     | C G A                                     | 34    |
| chr19 | 33355772       | 33355772     | SNV          | C                             | T-T                                       | 1     | C-T                                       | 37    |
| chr19 | 33355781       | 33355781     | SNV          | C                             | C-T                                       | 2     |                                           | 0     |
| chr19 | 33355782       | 33355782     | SNV          | C                             | C-G                                       | 12    |                                           | 0     |
| chr19 | 33355816       | 33355816     | SNV          | G                             | A-G                                       | 13    |                                           | 0     |
| chr19 | 33355892       | 33355892     | SNV          | G                             | A-A                                       | 2     | A-G                                       | 113   |
| chr19 | 33355893       | 33355893     | SNV          | C                             | C-T                                       | 3     |                                           | 0     |
| chr19 | 33355951       | 33355951     | SNV          | A                             | G-G                                       | 185   | A-G                                       | 1002  |
| chr19 | 33356018       | 33356018     | SNV          | C                             | C-G                                       | 2     |                                           | 0     |
| chr19 | 33356076       | 33356076     | SNV          | G                             | A-G                                       | 20    |                                           | 0     |
| chr19 | 33356082       | 33356082     | SNV          | G                             | A-G                                       | 4     |                                           | 0     |
| chr19 | 33356088       | 33356088     | SNV          | C                             | C-T                                       | 89    |                                           | 0     |
| chr19 | 33356145       | 33356145     | SNV          | T                             | C-T                                       | 60    |                                           | 0     |
| chr19 | 33356246       | 33356246     | SNV          | G                             | C-C                                       | 7     | C-G                                       | 103   |
| chr19 | 33356287       | 33356287     | SNV          | G                             | C-G                                       | 42    |                                           | 0     |
| chr19 | 33356384       | 33356384     | SNV          | T                             | G-T                                       | 14    |                                           | 0     |
| chr19 | 33356522       | 33356522     | SNV          | G                             | C-G                                       | 27    |                                           | 0     |
| chr19 | 33356706       | 33356706     | SNV          | G                             | A-G                                       | 1     |                                           | 0     |
| chr19 | 33356857       | 33356857     | insertion    | CTCT                          | CTCT                                      | 1251  | -CT                                       | 1003  |
| chr19 | 33356879       | 33356879     | SNV          | A                             | A-C                                       | 41    |                                           | 0     |
| chr19 | 33356891       | 33356891     | SNV          | T                             | C-T                                       | 1169  | C-C                                       | 476   |
| chr19 | 33356919       | 33356921     | deletion     | AAG                           | -AAG                                      | 6     |                                           | 0     |
| chr19 | 33356962       | 33356962     | SNV          | C                             | C-T                                       | 405   | T-T                                       | 30    |
| chr19 | 33357016       | 33357016     | SNV          | A                             | A-C                                       | 162   | C-C                                       | 14    |
| chr19 | 33357039       | 33357039     | SNV          | C                             | T-T                                       | 3     | C-T                                       | 34    |
| chr19 | 33357058       | 33357058     | SNV          | G                             | A-A                                       | 40    | A-A                                       | 243   |
| chr19 | 33357099       | 33357099     | SNV          | G                             | A-G                                       | 315   | A-A                                       | 21    |
| chr19 | 33357176       | 33357176     | SNV          | G                             | A-G                                       | 493   | A-A                                       | 46    |
| chr19 | 33357187       | 33357187     | SNV          | C                             | C-T                                       | 508   | T-T                                       | 59    |
| chr19 | 33357297       | 33357297     | SNV          | C                             | C-T                                       | 1     |                                           | 0     |
| chr19 | 33357318       | 33357318     | SNV          | A                             | A-G                                       | 1243  | A-G                                       | 1008  |
| chr19 | 33357340       | 33357340     | SNV          | G                             | C-C                                       | 3     |                                           | 0     |
| chr19 | 33357433       | 33357433     | SNV          | G                             | C-C                                       | 704   | C-G                                       | 1235  |
| chr19 | 33357677       | 33357677     | SNV          | T                             | C-C                                       | 105   | C-T                                       | 607   |
| chr19 | 33357705       | 33357705     | SNV          | G                             | A-A                                       | 32    | A-G                                       | 110   |
| chr19 | 33357779       | 33357779     | SNV          | G                             | A-G                                       | 20    |                                           | 0     |
| chr19 | 33357844       | 33357844     | SNV          | G                             | C-C                                       | 552   | C-G                                       | 1181  |
| chr19 | 33358007       | 33358007     | SNV          | G                             | A-G                                       | 62    | A-A                                       | 0     |
| chr19 | 33358012       | 33358012     | SNV          | T                             | G-T                                       | 1013  | G-G                                       | 206   |
| chr19 | 33358075       | 33358075     | SNV          | A                             | A-T                                       | 24    |                                           | 0     |
| chr19 | 33358079       | 33358079     | SNV          | G                             | A-A                                       | 7     | A-G                                       | 91    |
| chr19 | 33358231       | 33358231     | SNV          | G                             | A-G                                       | 13    |                                           | 0     |
| chr19 | 33358262       | 33358262     | SNV          | A                             | A-G                                       | 607   | G-G                                       | 105   |
| chr19 | 33358355       | 33358355     | SNV          | T                             | C-T                                       | 1236  | C-C                                       | 703   |
| chr19 | 33358438       | 33358438     | SNV          | A                             | A-T                                       | 7     |                                           | 0     |
| chr19 | 33358438       | 33358438     | SNV          | A                             | A-T                                       | 7     |                                           | 0     |
| chr19 | 33358442       | 33358442     | SNV          | A                             | A-T                                       | 159   | T-T                                       | 5     |
| chr19 | 33358527       | 33358527     | SNV          | A                             | A-C                                       | 611   | C-C                                       | 105   |
| chr19 | 33358629       | 33358629     | SNV          | T                             | C-T                                       | 28    |                                           | 0     |
| chr19 | 33358687       | 33358687     | SNV          | C                             | A-C                                       | 20    |                                           | 0     |
| chr19 | 33358712       | 33358712     | SNV          | G                             | A-G                                       | 74    | A-A                                       | 2     |
| chr19 | 33358716       | 33358716     | SNV          | T                             | A-T                                       | 20    |                                           | 0     |
| chr19 | 33358887       | 33358887     | SNV          | C                             | C-G                                       | 28    |                                           | 0     |
| chr19 | 33358963       | 33358963     | SNV          | C                             | G-G                                       | 97    | C-G                                       | 588   |
| chr19 | 33358998       | 33358998     | SNV          | A                             | A-G                                       | 1236  | G-G                                       | 703   |
| chr19 | 33359006       | 33359006     | SNV          | G                             | A-G                                       | 11    |                                           | 0     |
| chr19 | 33359008       | 33359008     | SNV          | G                             | G-T                                       | 11    |                                           | 0     |
| chr19 | 33359047       | 33359047     | SNV          | G                             | A-G                                       | 20    |                                           | 0     |
| chr19 | 33359061       | 33359061     | SNV          | G                             | A-A                                       | 107   | A-G                                       | 607   |
| chr19 | 33359078       | 33359078     | SNV          | A                             | A-G                                       | 20    |                                           | 0     |
| chr19 | 33359079       | 33359079     | SNV          | T                             | G-T                                       | 1177  | G-G                                       | 556   |
| chr19 | 33359240       | 33359240     | SNV          | A                             | A-G                                       | 1026  | G-G                                       | 221   |
| chr19 | 33359479       | 33359479     | SNV          | G                             | A-G                                       | 637   | A-A                                       | 106   |
| chr19 | 33359679       | 33359679     | SNV          | G                             | A-G                                       | 24    |                                           | 0     |
| chr19 | 33359723       | 33359723     | SNV          | A                             | A-C                                       | 13    |                                           | 0     |
| chr19 | 33359778       | 33359778     | SNV          | T                             | G-T                                       | 1     |                                           | 0     |
| chr19 | 33359791       | 33359791     | SNV          | A                             | A-T                                       | 701   | T-T                                       | 70    |
| chr19 | 33359832       | 33359832     | SNV          | G                             | A-G                                       | 927   | A-A                                       | 186   |
| chr19 | 33359943       | 33359943     | SNV          | G                             | A-A                                       | 110   | A-G                                       | 617   |
| chr19 | 33359960       | 33359960     | deletion     | A                             | -                                         | 387   | -A                                        | 1352  |
| chr19 | 33359984       | 33359984     | SNV          | T                             | C-T                                       | 1     | C-C                                       | 36    |
| chr19 | 33360053       | 33360053     | SNV          | C                             | A-A                                       | 7     | A-C                                       | 180   |
| chr19 | 33360083       | 33360083     | SNV          | C                             | G-G                                       | 32    | C-G                                       | 450   |
| chr19 | 33360121       | 33360122     | deletion     | TC                            | -TC                                       | 11    |                                           | 0     |
| chr19 | 33360131       | 33360131     | SNV          | A                             | C-C                                       | 5     | A-C                                       | 89    |
| chr19 | 33360214       | 33360214     | SNV          | T                             | C-T                                       | 1     |                                           | 0     |
| chr19 | 33360306       | 33360306     | insertion    | -                             | -T                                        | 17    |                                           | 0     |
| chr19 | 33360341       | 33360341     | SNV          | C                             | C-T                                       | 41    |                                           | 0     |
| chr19 | 33360342       | 33360342     | SNV          | C                             | A-A                                       | 21    | A-G                                       | 314   |
| chr19 | 33360369       | 33360369     | SNV          | C                             | A-C                                       | 1225  | A-A                                       | 560   |
| chr19 | 33360409       | 33360409     | SNV          | C                             | C-T                                       | 28    |                                           | 0     |
| chr19 | 33360575       | 33360575     | SNV          | C                             | G-G                                       | 9     | C-G                                       | 111   |
| chr19 | 33360652       | 33360652     | SNV          | A                             | T-T                                       | 763   | A-T                                       | 1177  |
| chr19 | 33360632       | 33360632     | SNV          | G                             | A-G                                       | 3     |                                           | 0     |
| chr19 | 33364603       | 33364603     | SNV          | G                             | A-G                                       | 1     |                                           | 0     |
| chr19 | 33362649       | 33362649     | SNV          | C                             | C-G                                       | 10    |                                           | 0     |
| chr19 | 33364259       | 33364259     | SNV          | G                             | A-G                                       | 1     |                                           | 0     |
| chr19 | 33333116       | 33333116     | SNV          | G I                           | A G I                                     | 3     |                                           | 0     |
| chr19 | 33346564       | 33346564     | SNV          | T                             | C-T                                       | 5     |                                           | 0     |
| chr19 | 33326797       | 33326797     | SNV          | G                             | C-G                                       | 11    |                                           | 0     |
| chr19 | 33321179       | 33321179     | SNV          | C S                           | C T S                                     | 50    |                                           | 0     |
| chr19 | 33324286       | 33324289     | deletion     | AAAA                          | -AAAA                                     | 5     |                                           | 0     |
| chr19 | 33338812       | 33338812     | SNV          | T                             | G-T                                       | 1     |                                           | 0     |
| chr19 | 33359317       | 33359317     | SNV          | A                             | A-G                                       | 2     |                                           | 0     |
| chr19 | 33336876       | 33336876     | insertion    | -                             | -TAG                                      | 10    |                                           | 0     |
| chr19 | 33326009       | 33326009     | SNV          | T                             | G-T                                       | 14    | G-G                                       | 1     |
| chr19 | 33323739       | 33323739     | SNV          | C                             | C-T                                       | 0     |                                           | 3     |
| chr19 | 33324959       | 33324962     | deletion     | AGGC                          | -AGGC                                     | 46    |                                           | 0     |
| chr19 | 33356989       | 33356989     | SNV          | C                             | A-A                                       | 1     | A-C                                       | 14    |
| chr19 | 33321608       | 33321608     | SNV          | A                             | C-T                                       | 6     |                                           | 0     |
| chr19 | 33353508       | 33353508     | SNV          | C                             | A-G                                       | 1     |                                           | 0     |
| chr19 | 33342947       | 33342947     | SNV          | G                             | A-G                                       | 1     |                                           | 0     |
| chr19 | 33352645       | 33352645     | SNV          | G                             | A-G                                       | 1     |                                           | 0     |
| chr19 | 33355504       | 33355504     | SNV          | G T                           | A G T                                     | 1     |                                           | 0     |
| chr19 | 33356002       | 33356002     | SNV          | G                             | G-T                                       | 2     |                                           | 0     |
| chr19 | 33355747       | 33355747     | SNV          | C                             | C-T                                       | 7     |                                           | 0     |
| chr19 | 33355066       | 33355066     | SNV          | C A                           | C T A                                     | 1     |                                           | 0     |
| chr19 | 33351922       | 33351922     | SNV          | G                             | A-G                                       | 7     |                                           | 0     |
| chr19 | 33323334       | 33323334     | SNV          | A                             | A-T                                       | 1     |                                           | 0     |
| chr19 | 33320181       | 33320181     | SNV          | C                             | C-T                                       | 1     |                                           | 0     |
| chr19 | 33358056       | 33358056     | SNV          | T                             | C-T                                       | 8     |                                           | 0     |
| chr19 | 33353488       | 33353488     | SNV          | G F                           | A G F                                     | 2     |                                           | 0     |
| chr19 | 33326465       | 33326465     | SNV          | A                             | A-C                                       | 12    |                                           | 0     |
| chr19 | 33334350       | 33334350     | SNV          | G                             | A-G                                       | 1     |                                           | 0     |
| chr19 | 33337919       | 33337919     | SNV          | A                             | A-G                                       | 5     |                                           | 0     |
| chr19 | 33337606       | 33337606     | SNV          | G                             | A-G                                       | 3     |                                           | 0     |

Supplementary Table 2. Variants of SLC7A9 in the 1KG database

| Chr   | Start Position | End Position | Variant type | Ref Genotype   Ref Proteotype | Variant Genotype 1   Variant Proteotype 1 | Count | Variant Genotype 2   Variant Proteotype 2 | Count |
|-------|----------------|--------------|--------------|-------------------------------|-------------------------------------------|-------|-------------------------------------------|-------|
| chr19 | 33349753       | 33349753     | SNV          | G                             | G.T                                       | 1     |                                           | 0     |
| chr19 | 33350001       | 33350001     | SNV          | C                             | A.C                                       | 1     |                                           | 0     |
| chr19 | 33352148       | 33352148     | SNV          | G                             | G.T                                       | 0     |                                           | 0     |
| chr19 | 33344106       | 33344106     | SNV          | C                             | T.T                                       | 2     | C.T                                       | 31    |
| chr19 | 33329644       | 33329644     | SNV          | C                             | C.T                                       | 8     |                                           | 0     |
| chr19 | 33336975       | 33336975     | SNV          | G                             | A.G                                       | 3     |                                           | 0     |
| chr19 | 33354535       | 33354535     | SNV          | G                             | A.G                                       | 1     |                                           | 0     |
| chr19 | 33337233       | 33337233     | SNV          | C                             | C.T                                       | 12    |                                           | 0     |
| chr19 | 33328017       | 33328017     | SNV          | C                             | C.G                                       | 1     |                                           | 0     |
| chr19 | 33360320       | 33360320     | SNV          | C                             | C.T                                       | 2     |                                           | 0     |
| chr19 | 33322185       | 33322185     | SNV          | A                             | A.G                                       | 3     |                                           | 0     |
| chr19 | 33332857       | 33332857     | SNV          | G                             | A.G                                       | 4     |                                           | 0     |
| chr19 | 33352257       | 33352257     | SNV          | G                             | A.G                                       | 1     |                                           | 0     |
| chr19 | 33333614       | 33333614     | SNV          | G                             | A.G                                       | 8     |                                           | 0     |
| chr19 | 33336771       | 33336771     | SNV          | C                             | C.T                                       | 1     |                                           | 0     |
| chr19 | 33355773       | 33355773     | SNV          | G                             | A.G                                       | 14    |                                           | 0     |
| chr19 | 33324453       | 33324453     | SNV          | C                             | C.T                                       | 10    |                                           | 0     |
| chr19 | 33354215       | 33354215     | SNV          | T                             | G.T                                       | 5     |                                           | 0     |
| chr19 | 33329186       | 33329186     | SNV          | A                             | A.G                                       | 4     |                                           | 0     |
| chr19 | 33330143       | 33330143     | SNV          | C                             | C.T                                       | 5     |                                           | 0     |
| chr19 | 33337234       | 33337234     | SNV          | G                             | A.G                                       | 1     |                                           | 0     |
| chr19 | 33324545       | 33324545     | SNV          | C                             | C.T                                       | 0     |                                           | 0     |
| chr19 | 33352872       | 33352872     | SNV          | G                             | A.G                                       | 2     |                                           | 0     |
| chr19 | 33338335       | 33338335     | SNV          | G                             | A.G                                       | 2     |                                           | 0     |
| chr19 | 33333327       | 33333327     | SNV          | A                             | A.G                                       | 1     |                                           | 0     |
| chr19 | 33354154       | 33354154     | SNV          | A                             | A.G                                       | 4     |                                           | 0     |
| chr19 | 33351478       | 33351478     | SNV          | C                             | C.T                                       | 1     |                                           | 0     |
| chr19 | 33323091       | 33323091     | SNV          | A                             | A.T                                       | 3     |                                           | 0     |
| chr19 | 33344887       | 33344887     | SNV          | T                             | G.T                                       | 2     |                                           | 0     |
| chr19 | 33332334       | 33332334     | SNV          | A                             | A.G                                       | 1     |                                           | 0     |
| chr19 | 33331398       | 33331398     | SNV          | C                             | C.T                                       | 4     |                                           | 0     |
| chr19 | 33360644       | 33360644     | SNV          | G                             | A.G                                       | 0     |                                           | 0     |
| chr19 | 33323017       | 33323017     | SNV          | A                             | A.G                                       | 8     |                                           | 0     |
| chr19 | 33336672       | 33336672     | SNV          | G                             | A.G                                       | 12    |                                           | 0     |
| chr19 | 33325049       | 33325049     | SNV          | G                             | G.T                                       | 1     |                                           | 0     |
| chr19 | 33344769       | 33344769     | SNV          | G                             | C.G                                       | 49    |                                           | 0     |
| chr19 | 33328972       | 33328972     | SNV          | C                             | C.T                                       | 2     |                                           | 0     |
| chr19 | 33327041       | 33327041     | SNV          | G                             | A.G                                       | 13    |                                           | 0     |
| chr19 | 33344259       | 33344259     | SNV          | A                             | A.G                                       | 1     |                                           | 0     |
| chr19 | 33350446       | 33350446     | SNV          | G                             | A.G                                       | 5     |                                           | 0     |
| chr19 | 33337182       | 33337182     | SNV          | A                             | A.T                                       | 3     |                                           | 0     |
| chr19 | 33341957       | 33341957     | SNV          | G                             | A.G                                       | 1     |                                           | 0     |
| chr19 | 33354896       | 33354896     | SNV          | C                             | C.T                                       | 3     |                                           | 0     |
| chr19 | 33325926       | 33325926     | SNV          | C                             | C.G                                       | 7     |                                           | 0     |
| chr19 | 33342499       | 33342499     | SNV          | C                             | C.T                                       | 3     |                                           | 0     |
| chr19 | 33329610       | 33329610     | SNV          | A                             | A.T                                       | 1     |                                           | 0     |
| chr19 | 33321586       | 33321586     | SNV          | CIP                           | A.T/P                                     | 6     |                                           | 0     |
| chr19 | 33326291       | 33326291     | SNV          | A                             | A.T                                       | 2     |                                           | 0     |
| chr19 | 33360294       | 33360294     | SNV          | A                             | A.C                                       | 1     |                                           | 0     |
| chr19 | 33334875       | 33334875     | SNV          | G                             | A.G                                       | 1     |                                           | 0     |
| chr19 | 33346464       | 33346464     | SNV          | C                             | A.C                                       | 2     |                                           | 0     |
| chr19 | 33343032       | 33343032     | SNV          | A                             | A.G                                       | 1     |                                           | 0     |
| chr19 | 33349529       | 33349529     | SNV          | C                             | C.T                                       | 5     |                                           | 0     |
| chr19 | 33323489       | 33323489     | SNV          | G                             | C.G                                       | 12    |                                           | 0     |
| chr19 | 33346855       | 33346855     | SNV          | G                             | G.T                                       | 3     |                                           | 0     |
| chr19 | 33334723       | 33334723     | SNV          | C                             | C.T                                       | 1     |                                           | 0     |
| chr19 | 33355719       | 33355719     | SNV          | G                             | A.G                                       | 2     |                                           | 0     |
| chr19 | 33337364       | 33337364     | SNV          | C                             | C.T                                       | 9     |                                           | 0     |
| chr19 | 33347186       | 33347186     | SNV          | T                             | C.C                                       | 1     | C.T                                       | 18    |
| chr19 | 33350737       | 33350737     | SNV          | G A                           | A.G A                                     | 1     |                                           | 0     |
| chr19 | 33337359       | 33337359     | SNV          | G                             | A.G                                       | 1     |                                           | 0     |
| chr19 | 33347998       | 33347998     | SNV          | G                             | G.T                                       | 1     |                                           | 0     |
| chr19 | 33335189       | 33335189     | SNV          | T                             | A.T                                       | 3     |                                           | 0     |
| chr19 | 33350463       | 33350463     | SNV          | G                             | G.T                                       | 48    |                                           | 0     |
| chr19 | 33337001       | 33337001     | SNV          | G                             | A.G                                       | 1     |                                           | 0     |
| chr19 | 33346472       | 33346472     | SNV          | A                             | A.G                                       | 2     |                                           | 0     |
| chr19 | 33345791       | 33345791     | SNV          | G                             | A.G                                       | 1     |                                           | 0     |
| chr19 | 33359130       | 33359130     | SNV          | C                             | C.T                                       | 1     |                                           | 0     |
| chr19 | 33331639       | 33331639     | SNV          | C                             | C.T                                       | 1     |                                           | 0     |
| chr19 | 33322172       | 33322172     | SNV          | T                             | C.T                                       | 1     |                                           | 0     |
| chr19 | 33336991       | 33336991     | SNV          | C                             | C.T                                       | 3     |                                           | 0     |
| chr19 | 33345910       | 33345910     | SNV          | T                             | A.T                                       | 2     |                                           | 0     |
| chr19 | 33348444       | 33348444     | SNV          | C                             | C.T                                       | 9     |                                           | 0     |
| chr19 | 33324683       | 33324683     | SNV          | A                             | A.G                                       | 10    |                                           | 0     |
| chr19 | 33324565       | 33324565     | SNV          | G                             | A.G                                       | 7     |                                           | 0     |
| chr19 | 33353449       | 33353449     | SNV          | G S                           | A.G S                                     | 10    |                                           | 0     |
| chr19 | 33356583       | 33356583     | SNV          | G                             | T.T                                       | 1     | G.T                                       | 19    |
| chr19 | 33346438       | 33346438     | SNV          | T                             | C.T                                       | 13    |                                           | 0     |
| chr19 | 33323233       | 33323233     | SNV          | G                             | A.G                                       | 5     |                                           | 0     |
| chr19 | 33327921       | 33327921     | SNV          | C                             | C.T                                       | 1     |                                           | 0     |
| chr19 | 33339720       | 33339720     | SNV          | C                             | C.T                                       | 10    |                                           | 0     |
| chr19 | 33330996       | 33330996     | SNV          | A                             | A.T                                       | 1     |                                           | 0     |
| chr19 | 33344277       | 33344277     | SNV          | T                             | C.T                                       | 3     | C.C                                       | 1     |
| chr19 | 33360383       | 33360383     | SNV          | G                             | G.T                                       | 5     |                                           | 0     |
| chr19 | 33337926       | 33337926     | SNV          | C                             | A.C                                       | 1     |                                           | 0     |
| chr19 | 33331511       | 33331511     | SNV          | A                             | A.T                                       | 14    |                                           | 0     |
| chr19 | 33350637       | 33350637     | SNV          | G                             | A.G                                       | 2     |                                           | 0     |
| chr19 | 33347790       | 33347790     | SNV          | G                             | A.G                                       | 1     |                                           | 0     |
| chr19 | 33356467       | 33356467     | SNV          | G                             | A.G                                       | 1     |                                           | 0     |
| chr19 | 33336386       | 33336386     | SNV          | C                             | C.T                                       | 4     |                                           | 0     |
| chr19 | 33328646       | 33328646     | SNV          | A                             | A.G                                       | 1     |                                           | 0     |
| chr19 | 33326536       | 33326536     | SNV          | C                             | A.C                                       | 4     |                                           | 0     |
| chr19 | 33342058       | 33342058     | SNV          | A                             | A.G                                       | 17    |                                           | 0     |
| chr19 | 33358904       | 33358904     | SNV          | C                             | C.T                                       | 7     |                                           | 0     |
| chr19 | 33346556       | 33346556     | SNV          | C                             | C.G                                       | 9     |                                           | 0     |
| chr19 | 33340000       | 33340000     | SNV          | A                             | A.C                                       | 8     |                                           | 0     |
| chr19 | 33360615       | 33360615     | SNV          | C                             | C.T                                       | 2     |                                           | 0     |
| chr19 | 33322354       | 33322354     | SNV          | G                             | A.G                                       | 1     |                                           | 0     |
| chr19 | 33343965       | 33343965     | SNV          | G                             | A.G                                       | 1     |                                           | 0     |
| chr19 | 33348822       | 33348822     | SNV          | G                             | C.G                                       | 1     |                                           | 0     |
| chr19 | 33324212       | 33324212     | SNV          | G P                           | A.G P                                     | 4     |                                           | 0     |
| chr19 | 33335695       | 33335695     | SNV          | C                             | A.C                                       | 12    |                                           | 0     |
| chr19 | 33331888       | 33331888     | SNV          | T                             | C.T                                       | 1     |                                           | 0     |
| chr19 | 33335800       | 33335800     | SNV          | A                             | A.G                                       | 3     |                                           | 0     |
| chr19 | 33346333       | 33346333     | SNV          | C                             | C.T                                       | 21    |                                           | 0     |
| chr19 | 33335515       | 33335515     | SNV          | C                             | C.T                                       | 1     |                                           | 0     |
| chr19 | 33332878       | 33332878     | SNV          | T                             | G.T                                       | 2     |                                           | 0     |
| chr19 | 33354134       | 33354134     | deletion     | C                             | -C                                        | 5     |                                           | 0     |
| chr19 | 33324303       | 33324304     | deletion     | AA                            | -AA                                       | 3     |                                           | 0     |
| chr19 | 33353696       | 33353696     | SNV          | G                             | C.G                                       | 24    |                                           | 0     |
| chr19 | 33325067       | 33325067     | SNV          | A                             | A.C                                       | 9     |                                           | 0     |
| chr19 | 33350418       | 33350418     | SNV          | T                             | C.T                                       | 31    |                                           | 0     |
| chr19 | 33343428       | 33343428     | SNV          | C                             | C.T                                       | 1     |                                           | 0     |
| chr19 | 33345515       | 33345515     | SNV          | C                             | C.T                                       | 1     |                                           | 0     |
| chr19 | 33324578       | 33324578     | SNV          | C                             | C.T                                       | 26    | T.T                                       | 1     |
| chr19 | 33353228       | 33353228     | SNV          | G                             | A.G                                       | 1     |                                           | 0     |
| chr19 | 33331571       | 33331571     | SNV          | C                             | A.C                                       | 4     |                                           | 0     |
| chr19 | 33345773       | 33345773     | SNV          | C                             | C.T                                       | 4     |                                           | 0     |
| chr19 | 33321136       | 33321136     | SNV          | T                             | C.T                                       | 6     |                                           | 0     |
| chr19 | 33331663       | 33331663     | SNV          | C                             | C.T                                       | 2     |                                           | 0     |
| chr19 | 33343850       | 33343850     | SNV          | C                             | C.T                                       | 5     |                                           | 0     |
| chr19 | 33331142       | 33331142     | SNV          | G                             | A.G                                       | 30    |                                           | 0     |
| chr19 | 33353576       | 33353576     | insertion    | -                             | -G                                        | 5     |                                           | 0     |
| chr19 | 33331016       | 33331016     | SNV          | G                             | A.G                                       | 1     |                                           | 0     |
| chr19 | 33345664       | 33345664     | SNV          | A                             | A.G                                       | 2     |                                           | 0     |
| chr19 | 33354104       | 33354104     | SNV          | A                             | A.T                                       | 5     |                                           | 0     |
| chr19 | 33349322       | 33349322     | SNV          | G                             | A.G                                       | 5     |                                           | 0     |
| chr19 | 33358821       | 33358821     | SNV          | G                             | A.G                                       | 6     |                                           | 0     |
| chr19 | 33356009       | 33356009     | SNV          | G                             | A.G                                       | 6     |                                           | 0     |
| chr19 | 33351229       | 33351229     | SNV          | G                             | A.G                                       | 15    |                                           | 0     |
| chr19 | 33348038       | 33348038     | SNV          | A                             | A.G                                       | 6     |                                           | 0     |



Supplementary Table 2. Variants of SLC7A9 in the 1KG database

| Chr   | Start Position | End Position | Variant type | Ref Genotype   Ref Prototype | Variant Genotype 1   Variant Prototype 1 | Count | Variant Genotype 2   Variant Prototype 2 | Count |
|-------|----------------|--------------|--------------|------------------------------|------------------------------------------|-------|------------------------------------------|-------|
| chr19 | 33353315       | 33353315     | SNV          | T                            | CT                                       | 2     |                                          | 0     |
| chr19 | 33352926       | 33352926     | insertion    | -                            | -A                                       | 36    |                                          | 0     |
| chr19 | 33354191       | 33354191     | SNV          | G                            | A                                        | 1     |                                          | 0     |
| chr19 | 33331164       | 33331164     | SNV          | G                            | A                                        | 7     |                                          | 0     |
| chr19 | 33337334       | 33337334     | SNV          | G                            | C                                        | 14    | C/C                                      | 1     |
| chr19 | 33349284       | 33349284     | SNV          | C                            | C                                        | 11    |                                          | 0     |
| chr19 | 33327096       | 33327096     | SNV          | G                            | A                                        | 1     |                                          | 0     |
| chr19 | 33358028       | 33358028     | SNV          | C                            | C                                        | 14    | G/G                                      | 1     |
| chr19 | 33358359       | 33358359     | SNV          | G                            | A                                        | 5     |                                          | 0     |
| chr19 | 33335651       | 33335651     | SNV          | C                            | C                                        | 1     |                                          | 0     |
| chr19 | 33347748       | 33347748     | SNV          | A                            | A                                        | 7     |                                          | 0     |
| chr19 | 33346477       | 33346477     | SNV          | A                            | A                                        | 5     |                                          | 0     |
| chr19 | 33333445       | 33333445     | SNV          | G                            | A                                        | 1     |                                          | 0     |
| chr19 | 33328591       | 33328591     | SNV          | G                            | A                                        | 8     |                                          | 0     |
| chr19 | 33352267       | 33352267     | SNV          | A                            | A                                        | 1     |                                          | 0     |
| chr19 | 33327881       | 33327881     | SNV          | C                            | A                                        | 1     | A/C                                      | 22    |
| chr19 | 33334753       | 33334753     | SNV          | G                            | C                                        | 1     |                                          | 0     |
| chr19 | 33323507       | 33323507     | SNV          | A                            | A                                        | 4     |                                          | 0     |
| chr19 | 33351785       | 33351785     | SNV          | G                            | G                                        | 4     |                                          | 0     |
| chr19 | 33354427       | 33354427     | SNV          | G                            | A                                        | 1     |                                          | 0     |
| chr19 | 33350988       | 33350988     | SNV          | C                            | C                                        | 0     |                                          | 0     |
| chr19 | 33320257       | 33320257     | SNV          | G                            | A                                        | 3     |                                          | 0     |
| chr19 | 33345026       | 33345026     | SNV          | C                            | C                                        | 10    |                                          | 0     |
| chr19 | 33349475       | 33349475     | SNV          | T                            | C                                        | 3     |                                          | 0     |
| chr19 | 33349696       | 33349696     | SNV          | T                            | G                                        | 7     |                                          | 0     |
| chr19 | 33354719       | 33354719     | SNV          | G                            | A                                        | 7     |                                          | 0     |
| chr19 | 33337670       | 33337670     | SNV          | C                            | C                                        | 1     |                                          | 0     |
| chr19 | 33347250       | 33347250     | SNV          | G                            | A                                        | 1     |                                          | 0     |
| chr19 | 33332909       | 33332909     | SNV          | G                            | A                                        | 6     |                                          | 0     |
| chr19 | 33329041       | 33329041     | SNV          | G                            | G                                        | 1     |                                          | 0     |
| chr19 | 33352653       | 33352653     | SNV          | C                            | C                                        | 12    |                                          | 0     |
| chr19 | 33333299       | 33333299     | SNV          | A                            | A                                        | 1     |                                          | 0     |
| chr19 | 33356430       | 33356430     | SNV          | C                            | C                                        | 5     |                                          | 0     |
| chr19 | 33343738       | 33343738     | SNV          | T                            | T                                        | 3     |                                          | 0     |
| chr19 | 33324294       | 33324294     | SNV          | C                            | C                                        | 2     |                                          | 0     |
| chr19 | 33344209       | 33344209     | SNV          | G                            | A                                        | 33    |                                          | 0     |
| chr19 | 33327942       | 33327942     | SNV          | C                            | C                                        | 6     |                                          | 0     |
| chr19 | 33345165       | 33345165     | SNV          | C                            | C                                        | 8     |                                          | 0     |
| chr19 | 33339903       | 33339903     | SNV          | A                            | A                                        | 9     |                                          | 0     |
| chr19 | 33355112       | 33355112     | SNV          | GT                           | AG MT                                    | 2     |                                          | 0     |
| chr19 | 33351991       | 33351991     | SNV          | A                            | A                                        | 2     |                                          | 0     |
| chr19 | 33321518       | 33321518     | SNV          | G                            | A                                        | 8     |                                          | 0     |
| chr19 | 33358443       | 33358443     | SNV          | T                            | A                                        | 1     |                                          | 0     |
| chr19 | 33354057       | 33354057     | SNV          | G                            | A                                        | 7     |                                          | 0     |
| chr19 | 33359464       | 33359464     | SNV          | A                            | A                                        | 1     |                                          | 0     |
| chr19 | 33325565       | 33325565     | SNV          | A                            | A                                        | 1     |                                          | 0     |
| chr19 | 33321991       | 33321991     | SNV          | C                            | C                                        | 1     |                                          | 0     |
| chr19 | 33326626       | 33326626     | SNV          | C                            | A                                        | 2     |                                          | 0     |
| chr19 | 33335534       | 33335534     | SNV          | G                            | A                                        | 7     |                                          | 0     |
| chr19 | 33346595       | 33346595     | SNV          | A                            | A                                        | 6     |                                          | 0     |
| chr19 | 33328658       | 33328658     | SNV          | C                            | A                                        | 1     |                                          | 0     |
| chr19 | 33345094       | 33345094     | SNV          | T                            | T                                        | 1     |                                          | 0     |
| chr19 | 33355270       | 33355270     | SNV          | C                            | C                                        | 1     |                                          | 0     |
| chr19 | 33359282       | 33359282     | SNV          | A                            | A                                        | 2     |                                          | 0     |
| chr19 | 33349463       | 33349463     | SNV          | C                            | C                                        | 1     |                                          | 0     |
| chr19 | 33353205       | 33353205     | SNV          | T                            | G                                        | 7     |                                          | 0     |
| chr19 | 33327838       | 33327838     | SNV          | T                            | T                                        | 1     |                                          | 0     |
| chr19 | 33332896       | 33332896     | SNV          | A                            | A                                        | 1     |                                          | 0     |
| chr19 | 33341734       | 33341734     | SNV          | A                            | A                                        | 1     |                                          | 0     |
| chr19 | 33329085       | 33329085     | SNV          | G                            | A                                        | 8     |                                          | 0     |
| chr19 | 33357392       | 33357392     | SNV          | G                            | A                                        | 5     |                                          | 0     |
| chr19 | 33349897       | 33349897     | SNV          | G                            | A                                        | 24    | A/A                                      | 1     |
| chr19 | 33345279       | 33345279     | SNV          | C                            | C                                        | 1     |                                          | 0     |
| chr19 | 33321810       | 33321810     | SNV          | T                            | T                                        | 2     |                                          | 0     |
| chr19 | 33357415       | 33357415     | SNV          | C                            | C                                        | 1     |                                          | 0     |
| chr19 | 33360159       | 33360159     | SNV          | G                            | G                                        | 8     |                                          | 0     |
| chr19 | 33356688       | 33356688     | SNV          | C                            | C                                        | 2     |                                          | 0     |
| chr19 | 33336850       | 33336850     | SNV          | C                            | C                                        | 1     |                                          | 0     |
| chr19 | 33330998       | 33331009     | deletion     | CCCTTTCTACTT                 | -CCCTTTCTACTT                            | 6     |                                          | 0     |
| chr19 | 33330383       | 33330383     | SNV          | C                            | A                                        | 1     |                                          | 0     |
| chr19 | 33355581       | 33355581     | SNV          | C/G                          | C/T G/G                                  | 1     |                                          | 0     |
| chr19 | 33354605       | 33354605     | SNV          | A                            | A                                        | 6     |                                          | 0     |
| chr19 | 33351422       | 33351422     | SNV          | G                            | G                                        | 1     |                                          | 0     |
| chr19 | 33349148       | 33349148     | SNV          | A                            | A                                        | 12    |                                          | 0     |
| chr19 | 33341571       | 33341571     | SNV          | T                            | C                                        | 8     |                                          | 0     |
| chr19 | 33321545       | 33321545     | SNV          | G/P                          | A/G L/P                                  | 1     |                                          | 0     |
| chr19 | 33350829       | 33350829     | SNV          | G/T                          | A/G T                                    | 1     |                                          | 0     |
| chr19 | 33350730       | 33350730     | SNV          | G                            | A                                        | 1     |                                          | 0     |
| chr19 | 33353502       | 33353502     | SNV          | T                            | C                                        | 1     |                                          | 0     |
| chr19 | 33327705       | 33327705     | SNV          | C                            | C                                        | 11    |                                          | 0     |
| chr19 | 33326587       | 33326587     | SNV          | A                            | A                                        | 6     |                                          | 0     |
| chr19 | 33357142       | 33357142     | SNV          | C                            | C                                        | 21    |                                          | 0     |
| chr19 | 33331742       | 33331742     | SNV          | A                            | A                                        | 1     |                                          | 0     |
| chr19 | 33335994       | 33335994     | SNV          | C                            | C                                        | 2     |                                          | 0     |
| chr19 | 33347675       | 33347675     | SNV          | G                            | A                                        | 1     |                                          | 0     |
| chr19 | 33335742       | 33335742     | SNV          | C                            | C                                        | 1     |                                          | 0     |
| chr19 | 33330349       | 33330349     | SNV          | C                            | C                                        | 3     |                                          | 0     |
| chr19 | 33355848       | 33355848     | SNV          | G                            | A                                        | 2     |                                          | 0     |
| chr19 | 33336333       | 33336333     | SNV          | G                            | A                                        | 2     |                                          | 0     |
| chr19 | 33328662       | 33328662     | SNV          | A                            | A                                        | 1     |                                          | 0     |
| chr19 | 33331612       | 33331612     | SNV          | A                            | G                                        | 1     |                                          | 0     |
| chr19 | 33333131       | 33333131     | SNV          | CT                           | CT TT                                    | 1     |                                          | 0     |
| chr19 | 33350995       | 33350995     | SNV          | C                            | C                                        | 1     |                                          | 0     |
| chr19 | 33323536       | 33323536     | SNV          | G                            | A                                        | 1     |                                          | 0     |
| chr19 | 33324794       | 33324794     | SNV          | T                            | C                                        | 1     |                                          | 0     |
| chr19 | 33346343       | 33346343     | SNV          | C                            | C                                        | 1     |                                          | 0     |
| chr19 | 33338966       | 33338966     | SNV          | C                            | C                                        | 3     |                                          | 0     |
| chr19 | 33326486       | 33326486     | SNV          | T                            | A                                        | 2     |                                          | 0     |
| chr19 | 33356137       | 33356137     | SNV          | A                            | C                                        | 1     |                                          | 0     |
| chr19 | 33336342       | 33336342     | SNV          | A                            | A                                        | 3     |                                          | 0     |
| chr19 | 33348842       | 33348842     | SNV          | G                            | G                                        | 1     |                                          | 0     |
| chr19 | 33347886       | 33347886     | SNV          | G                            | A                                        | 1     |                                          | 0     |
| chr19 | 33330475       | 33330475     | SNV          | A                            | A                                        | 1     |                                          | 0     |
| chr19 | 33353570       | 33353570     | SNV          | T                            | A                                        | 1     |                                          | 0     |
| chr19 | 33322251       | 33322251     | SNV          | G                            | A                                        | 1     |                                          | 0     |
| chr19 | 33346678       | 33346678     | SNV          | G                            | C                                        | 2     |                                          | 0     |
| chr19 | 33322279       | 33322279     | SNV          | G                            | A                                        | 3     |                                          | 0     |
| chr19 | 33344109       | 33344109     | SNV          | G                            | A                                        | 1     |                                          | 0     |
| chr19 | 33360616       | 33360616     | SNV          | G                            | A                                        | 1     |                                          | 0     |
| chr19 | 33359396       | 33359396     | SNV          | C/S                          | CT S                                     | 1     |                                          | 0     |
| chr19 | 33332780       | 33332780     | SNV          | T                            | T                                        | 2     |                                          | 0     |
| chr19 | 33334328       | 33334328     | SNV          | G/T                          | A/G T                                    | 1     |                                          | 0     |
| chr19 | 33338497       | 33338497     | SNV          | A                            | A                                        | 1     |                                          | 0     |
| chr19 | 33359499       | 33359499     | SNV          | A                            | A                                        | 1     |                                          | 0     |
| chr19 | 33342043       | 33342043     | SNV          | C                            | C                                        | 1     |                                          | 0     |
| chr19 | 33359810       | 33359812     | deletion     | AAG                          | -AAG                                     | 5     |                                          | 0     |
| chr19 | 33331485       | 33331485     | SNV          | T                            | T                                        | 2     |                                          | 0     |
| chr19 | 33322771       | 33322771     | SNV          | G                            | A                                        | 1     |                                          | 0     |
| chr19 | 33322854       | 33322854     | SNV          | C                            | C                                        | 1     |                                          | 0     |
| chr19 | 33345343       | 33345343     | SNV          | T                            | C                                        | 1     |                                          | 0     |
| chr19 | 33333276       | 33333276     | SNV          | A                            | A                                        | 1     |                                          | 0     |
| chr19 | 33327531       | 33327531     | SNV          | T                            | G                                        | 2     |                                          | 0     |
| chr19 | 33346398       | 33346398     | SNV          | G                            | T                                        | 1     |                                          | 0     |
| chr19 | 33348032       | 33348032     | SNV          | G                            | A                                        | 1     |                                          | 0     |
| chr19 | 33335326       | 33335326     | SNV          | T                            | C                                        | 1     |                                          | 0     |
| chr19 | 33349122       | 33349122     | SNV          | G                            | A                                        | 1     |                                          | 0     |
| chr19 | 33330872       | 33330872     | SNV          | C                            | C                                        | 1     |                                          | 0     |
| chr19 | 33349448       | 33349448     | SNV          | G/T                          | A/G T                                    | 1     |                                          | 0     |
| chr19 | 33335405       | 33335405     | SNV          | T                            | A                                        | 1     |                                          | 0     |
| chr19 | 33348161       | 33348161     | SNV          | G                            | A                                        | 1     |                                          | 0     |
| chr19 | 33341947       | 33341947     | SNV          | T                            | G                                        | 1     |                                          | 0     |





Supplementary Table 2. Variants of SLC7A9 in the 1KG database

| Chr   | Start Position | End Position | Variant type | Ref Genotype   Ref Proteotype | Variant Genotype 1   Variant Proteotype 1 | Count | Variant Genotype 2   Variant Proteotype 2 | Count |
|-------|----------------|--------------|--------------|-------------------------------|-------------------------------------------|-------|-------------------------------------------|-------|
| chr19 | 33321045       | 33351045     | SNV          | A                             | A/G                                       | 1     |                                           | 0     |
| chr19 | 33323171       | 33323171     | SNV          | G                             | A/G                                       | 1     |                                           | 0     |
| chr19 | 33323924       | 33323924     | deletion     |                               | -TCC                                      | 3     |                                           | 0     |
| chr19 | 33356274       | 33356274     | SNV          | A                             | A/C                                       | 2     |                                           | 0     |
| chr19 | 33323011       | 33323011     | SNV          | G                             | A/G                                       | 1     |                                           | 0     |
| chr19 | 33346049       | 33346049     | SNV          | T                             | C/T                                       | 2     |                                           | 0     |
| chr19 | 33358641       | 33358641     | SNV          | A                             | A/G                                       | 2     |                                           | 0     |
| chr19 | 33351487       | 33351487     | SNV          | T                             | A/T                                       | 1     |                                           | 0     |
| chr19 | 33326685       | 33326685     | SNV          | G                             | A/G                                       | 1     |                                           | 0     |
| chr19 | 33356752       | 33356752     | SNV          | C                             | C/T                                       | 1     |                                           | 0     |
| chr19 | 33321719       | 33321719     | SNV          | T                             | C/T                                       | 1     |                                           | 0     |
| chr19 | 33336166       | 33336166     | SNV          | C                             | C/T                                       | 1     |                                           | 0     |
| chr19 | 33326268       | 33326268     | SNV          | A                             | A/C                                       | 1     |                                           | 0     |
| chr19 | 33323383       | 33323383     | SNV          | C                             | C/T                                       | 2     |                                           | 0     |
| chr19 | 33332055       | 33332055     | SNV          | C                             | C/T                                       | 1     |                                           | 0     |
| chr19 | 33324332       | 33324332     | SNV          | C                             | C/G                                       | 2     |                                           | 0     |
| chr19 | 33334502       | 33334502     | SNV          | A                             | A/G                                       | 1     |                                           | 0     |
| chr19 | 33359942       | 33359942     | SNV          | C                             | C/T                                       | 1     |                                           | 0     |
| chr19 | 33355587       | 33355587     | SNV          | A A                           | ALT AA                                    | 1     |                                           | 0     |
| chr19 | 33343346       | 33343346     | SNV          | G                             | A/G                                       | 1     |                                           | 0     |
| chr19 | 33356313       | 33356313     | SNV          | A                             | A/G                                       | 1     |                                           | 0     |
| chr19 | 33358721       | 33358721     | SNV          | C                             | C/T                                       | 1     |                                           | 0     |
| chr19 | 33351196       | 33351196     | SNV          | C                             | C/T                                       | 1     |                                           | 0     |
| chr19 | 33352270       | 33352270     | SNV          | A                             | A/C                                       | 1     |                                           | 0     |
| chr19 | 33343914       | 33343914     | SNV          | G                             | C/G                                       | 6     |                                           | 0     |
| chr19 | 33325757       | 33325757     | SNV          | C                             | A/C                                       | 1     |                                           | 0     |
| chr19 | 33345908       | 33345908     | SNV          | T                             | A/T                                       | 2     |                                           | 0     |
| chr19 | 33338679       | 33338679     | SNV          | C                             | C/T                                       | 1     |                                           | 0     |
| chr19 | 33338226       | 33338226     | SNV          | C                             | C/T                                       | 4     |                                           | 0     |
| chr19 | 33335652       | 33335652     | SNV          | G                             | A/G                                       | 1     |                                           | 0     |
| chr19 | 33359873       | 33359873     | SNV          | C                             | C/T                                       | 1     |                                           | 0     |
| chr19 | 33333359       | 33333359     | SNV          | T                             | G/T                                       | 1     |                                           | 0     |
| chr19 | 33332042       | 33332042     | SNV          | G                             | C/G                                       | 1     |                                           | 0     |
| chr19 | 33321680       | 33321680     | SNV          | T                             | G/T                                       | 1     |                                           | 0     |
| chr19 | 33352409       | 33352409     | SNV          | C V                           | C T V M                                   | 1     |                                           | 0     |
| chr19 | 33359588       | 33359588     | SNV          | G                             | A/G                                       | 1     |                                           | 0     |
| chr19 | 33336437       | 33336437     | SNV          | G                             | C/G                                       | 1     |                                           | 0     |
| chr19 | 33334652       | 33334652     | SNV          | A                             | A/G                                       | 1     |                                           | 0     |
| chr19 | 33323219       | 33323219     | SNV          | G                             | A/G                                       | 2     |                                           | 0     |
| chr19 | 33322249       | 33322249     | SNV          | G                             | A/G                                       | 1     |                                           | 0     |
| chr19 | 33355842       | 33355842     | SNV          | G                             | A/G                                       | 1     |                                           | 0     |
| chr19 | 33353953       | 33353953     | SNV          | C                             | C/T                                       | 1     |                                           | 0     |
| chr19 | 33322884       | 33322884     | SNV          | A                             | A/G                                       | 1     |                                           | 0     |
| chr19 | 33324116       | 33324116     | SNV          | G S                           | A G S                                     | 1     |                                           | 0     |
| chr19 | 33346420       | 33346420     | SNV          | A                             | A/G                                       | 1     |                                           | 0     |
| chr19 | 33322557       | 33322557     | SNV          | C                             | C/T                                       | 1     |                                           | 0     |
| chr19 | 33343601       | 33343601     | SNV          | A                             | A/G                                       | 1     |                                           | 0     |
| chr19 | 33327958       | 33327958     | SNV          | A                             | A/G                                       | 1     |                                           | 0     |
| chr19 | 33326392       | 33326392     | SNV          | T                             | C/T                                       | 1     |                                           | 0     |
| chr19 | 33354148       | 33354148     | SNV          | G                             | G/T                                       | 1     |                                           | 0     |
| chr19 | 33328256       | 33328256     | SNV          | C                             | C/T                                       | 1     |                                           | 0     |
| chr19 | 33330849       | 33330849     | SNV          | T                             | C/T                                       | 1     |                                           | 0     |
| chr19 | 33325191       | 33325191     | SNV          | T                             | C/T                                       | 1     |                                           | 0     |
| chr19 | 33324586       | 33324586     | SNV          | C                             | C/T                                       | 1     |                                           | 0     |
| chr19 | 33324619       | 33324619     | SNV          | C                             | C/T                                       | 1     |                                           | 0     |
| chr19 | 33346376       | 33346376     | SNV          | C                             | C/T                                       | 1     |                                           | 0     |
| chr19 | 33322674       | 33322674     | SNV          | T                             | G/T                                       | 1     |                                           | 0     |
| chr19 | 33347319       | 33347319     | SNV          | C                             | C/T                                       | 8     |                                           | 0     |
| chr19 | 33350171       | 33350171     | SNV          | G                             | A/G                                       | 1     |                                           | 0     |
| chr19 | 33349127       | 33349127     | SNV          | C                             | C/T                                       | 1     |                                           | 0     |
| chr19 | 33325468       | 33325468     | SNV          | G                             | A/G                                       | 1     |                                           | 0     |
| chr19 | 33338567       | 33338567     | SNV          | A                             | A/G                                       | 3     |                                           | 0     |
| chr19 | 33355539       | 33355539     | SNV          | C T                           | C T T                                     | 1     |                                           | 0     |
| chr19 | 33338144       | 33338144     | SNV          | G                             | G/T                                       | 1     |                                           | 0     |
| chr19 | 33355389       | 33355389     | SNV          | G                             | A/G                                       | 1     |                                           | 0     |
| chr19 | 33322503       | 33322503     | SNV          | A                             | A/G                                       | 4     |                                           | 0     |
| chr19 | 33351270       | 33351270     | SNV          | C                             | C/T                                       | 4     |                                           | 0     |
| chr19 | 33348253       | 33348253     | SNV          | G                             | A/G                                       | 1     |                                           | 0     |
| chr19 | 33360620       | 33360620     | SNV          | G                             | A/G                                       | 1     |                                           | 0     |
| chr19 | 33346401       | 33346401     | SNV          | C                             | C/T                                       | 1     |                                           | 0     |
| chr19 | 33353113       | 33353113     | SNV          | C K                           | A C N K                                   | 1     |                                           | 0     |
| chr19 | 33360433       | 33360433     | SNV          | G                             | A/G                                       | 5     |                                           | 0     |
| chr19 | 33323660       | 33323660     | SNV          | G                             | G/T                                       | 1     |                                           | 0     |
| chr19 | 33335329       | 33335329     | SNV          | G                             | A/G                                       | 1     |                                           | 0     |
| chr19 | 33333102       | 33333102     | SNV          | G T                           | C G T                                     | 1     |                                           | 0     |
| chr19 | 33335561       | 33335561     | SNV          | A                             | A/C                                       | 1     |                                           | 0     |
| chr19 | 33345552       | 33345552     | SNV          | T                             | C/T                                       | 1     |                                           | 0     |
| chr19 | 33357190       | 33357190     | SNV          | C                             | C/G                                       | 1     |                                           | 0     |
| chr19 | 33339319       | 33339319     | SNV          | A                             | A/G                                       | 1     |                                           | 0     |
| chr19 | 33322115       | 33322115     | SNV          | A                             | A/G                                       | 3     |                                           | 0     |
| chr19 | 33351475       | 33351475     | SNV          | G                             | G/T                                       | 1     |                                           | 0     |
| chr19 | 33348144       | 33348144     | SNV          | G                             | C/G                                       | 1     |                                           | 0     |
| chr19 | 33348621       | 33348621     | SNV          | C                             | C/T                                       | 1     |                                           | 0     |
| chr19 | 33325735       | 33325735     | SNV          | C                             | C/G                                       | 1     |                                           | 0     |
| chr19 | 33344467       | 33344467     | SNV          | A                             | A/G                                       | 1     |                                           | 0     |
| chr19 | 33360109       | 33360109     | SNV          | A                             | A/G                                       | 2     |                                           | 0     |
| chr19 | 33344947       | 33344947     | SNV          | T                             | C/T                                       | 3     |                                           | 0     |
| chr19 | 33339801       | 33339801     | SNV          | C                             | C/T                                       | 5     |                                           | 0     |
| chr19 | 33335678       | 33335678     | SNV          | G                             | A/G                                       | 2     |                                           | 0     |
| chr19 | 33326690       | 33326690     | SNV          | T                             | G/T                                       | 1     |                                           | 0     |
| chr19 | 33346501       | 33346501     | SNV          | A                             | A/G                                       | 1     |                                           | 0     |
| chr19 | 33327516       | 33327516     | SNV          | T                             | A/T                                       | 1     |                                           | 0     |
| chr19 | 33349560       | 33349560     | SNV          | G                             | A/G                                       | 1     |                                           | 0     |
| chr19 | 33357387       | 33357387     | SNV          | A                             | A/G                                       | 1     |                                           | 0     |
| chr19 | 33321517       | 33321517     | SNV          | C                             | C/T                                       | 1     |                                           | 0     |
| chr19 | 33332349       | 33332349     | SNV          | G                             | A/G                                       | 1     |                                           | 0     |
| chr19 | 33354497       | 33354497     | SNV          | C                             | C/G                                       | 1     |                                           | 0     |
| chr19 | 33351681       | 33351696     | deletion     | TTCCAGGTGAATTTT               | -TTCCAGGTGAATTTT                          | 5     |                                           | 0     |
| chr19 | 33349489       | 33349489     | SNV          | G                             | C/G                                       | 1     |                                           | 0     |
| chr19 | 33325960       | 33325960     | SNV          | C                             | C/T                                       | 1     |                                           | 0     |
| chr19 | 33349473       | 33349473     | SNV          | C                             | C/T                                       | 2     |                                           | 0     |
| chr19 | 33328261       | 33328261     | SNV          | T                             | C/T                                       | 1     |                                           | 0     |
| chr19 | 33332610       | 33332610     | SNV          | A                             | A/C                                       | 1     |                                           | 0     |
| chr19 | 33322285       | 33322285     | SNV          | C                             | C/T                                       | 1     |                                           | 0     |
| chr19 | 33350522       | 33350522     | SNV          | C                             | C/T                                       | 1     |                                           | 0     |
| chr19 | 33354391       | 33354391     | SNV          | A                             | A/G                                       | 1     |                                           | 0     |
| chr19 | 33355623       | 33355623     | SNV          | G F                           | A G F F                                   | 2     |                                           | 0     |
| chr19 | 33357391       | 33357391     | SNV          | C                             | C/T                                       | 1     |                                           | 0     |
| chr19 | 33332578       | 33332578     | SNV          | C                             | C/G                                       | 1     |                                           | 0     |
| chr19 | 33322795       | 33322795     | SNV          | C                             | C/T                                       | 1     |                                           | 0     |
| chr19 | 33355067       | 33355067     | SNV          | G A                           | A G V A                                   | 1     |                                           | 0     |
| chr19 | 33350015       | 33350015     | SNV          | T                             | C/T                                       | 3     |                                           | 0     |
| chr19 | 33357291       | 33357291     | SNV          | A                             | A/G                                       | 1     |                                           | 0     |
| chr19 | 33357861       | 33357861     | SNV          | C                             | C/G                                       | 1     |                                           | 0     |
| chr19 | 33323122       | 33323122     | SNV          | G                             | G/T                                       | 1     |                                           | 0     |
| chr19 | 33358117       | 33358117     | SNV          | G                             | A/G                                       | 1     |                                           | 0     |
| chr19 | 33331687       | 33331687     | SNV          | G                             | G/T                                       | 2     |                                           | 0     |
| chr19 | 33323117       | 33323117     | SNV          | C                             | C/T                                       | 1     |                                           | 0     |
| chr19 | 33325885       | 33325885     | SNV          | A                             | A/G                                       | 1     |                                           | 0     |
| chr19 | 33346432       | 33346432     | SNV          | C                             | C/T                                       | 1     |                                           | 0     |
| chr19 | 33348079       | 33348079     | SNV          | G                             | A/G                                       | 1     |                                           | 0     |
| chr19 | 33331088       | 33331088     | SNV          | T                             | A/T                                       | 1     |                                           | 0     |
| chr19 | 33345942       | 33345942     | SNV          | A                             | C/C                                       | 1     |                                           | 0     |
| chr19 | 33324224       | 33324224     | SNV          | G P                           | A G P P                                   | 1     |                                           | 0     |
| chr19 | 33346629       | 33346629     | SNV          | C                             | C/T                                       | 2     |                                           | 0     |
| chr19 | 33360654       | 33360654     | SNV          | G                             | A/G                                       | 1     |                                           | 0     |
| chr19 | 33340109       | 33340109     | SNV          | A                             | A/G                                       | 1     |                                           | 0     |
| chr19 | 33346888       | 33346888     | SNV          | A                             | A/G                                       | 1     |                                           | 0     |
| chr19 | 33343417       | 33343417     | SNV          | C                             | C/T                                       | 1     |                                           | 0     |
| chr19 | 33350586       | 33350586     | SNV          | C                             | A/C                                       | 1     |                                           | 0     |
| chr19 | 33354898       | 33354898     | SNV          | T                             | C/T                                       | 1     |                                           | 0     |
